# Supplementary material for: Biochemical and Comparative Transcriptomic Analyses Identify Candidate Genes Related to Variegation Formation in Paeonia rockii
Source: PubMed Central journal article supplement (PMC6152351; doi:10.3390/molecules22081364), 2017-08-17
Supplement: molecules-22-01364-s001.pdf [file molecules-22-01364-s001.pdf]

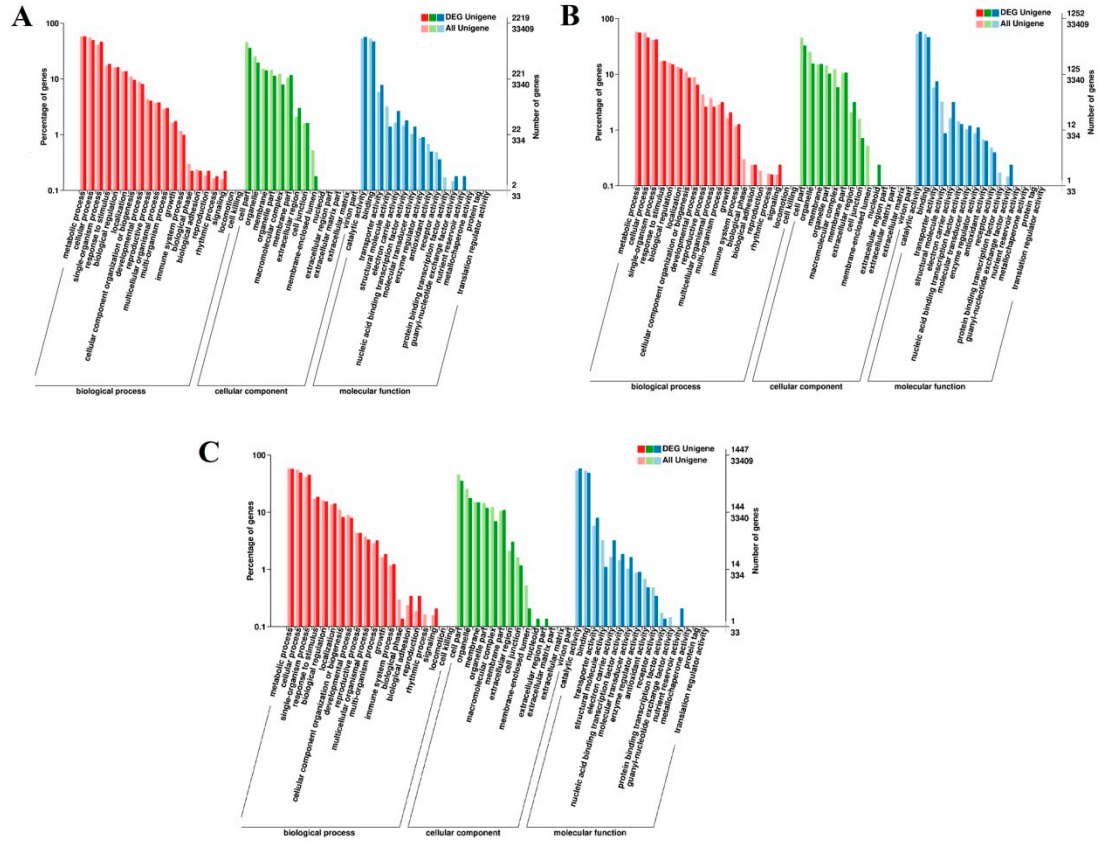

Figure S1. GO enrichment analysis of DEGs in the three groups. (A) GO enrichment analysis of DEGs for the PO and PR comparison; (B) GO enrichment analysis of DEGs for the PR and RO comparison; (C) GO enrichment analysis of DEGs for the PO and RO comparison.

**Table S1. Statistics of functional annotation.**

| <b>Annotated Database</b> | <b>Annotated_Number</b> | <b>300&lt;=length&lt;1000</b> | <b>length&gt;=1000</b> |
|---------------------------|-------------------------|-------------------------------|------------------------|
| nr Annotation             | 57913 (31.84%)          | 23699 (33.41%)                | 16502 (23.26%)         |
| Pfam Annotation           | 43307 (23.81%)          | 18082 (25.49%)                | 14968 (21.10%)         |
| Swissprot Annotation      | 34125 (18.76%)          | 13910 (19.61%)                | 11720 (16.52%)         |
| COG Annotation            | 18986 (10.44%)          | 7386 (10.41%)                 | 6848 (9.65%)           |
| GO Annotation             | 33409 (18.37%)          | 13150 (18.54%)                | 10150 (14.31%)         |
| KEGG Annotation           | 24154 (13.28%)          | 10433 (14.71%)                | 7102 (10.01%)          |
| KOG Annotation            | 47410 (26.07%)          | 20239 (28.53%)                | 11436 (16.12%)         |
| All Annotated             | 70944 (39.01%)          | 29535 (41.63%)                | 17361 (24.47%)         |
| All Unigenes              | 181866 (100.00%)        |                               |                        |

Table S2. KEGG pathway classification of Unigenes.

| #Pathway                      | ko_ID   | Unigene | gene  | Unigene_all | gene_all                                                                                                                                                                                                                                                                                                                                                                                                                                                                                                                                                                                                                                                                                                                                                                                                                                                                                                                                          |
|-------------------------------|---------|---------|-------|-------------|---------------------------------------------------------------------------------------------------------------------------------------------------------------------------------------------------------------------------------------------------------------------------------------------------------------------------------------------------------------------------------------------------------------------------------------------------------------------------------------------------------------------------------------------------------------------------------------------------------------------------------------------------------------------------------------------------------------------------------------------------------------------------------------------------------------------------------------------------------------------------------------------------------------------------------------------------|
| #KEGG_n                       | 715     | KEGG_N  | 13897 |             |                                                                                                                                                                                                                                                                                                                                                                                                                                                                                                                                                                                                                                                                                                                                                                                                                                                                                                                                                   |
| Starch and sucrose metabolism | ko00500 | 51      | 469   | 715         | 13897                                                                                                                                                                                                                                                                                                                                                                                                                                                                                                                                                                                                                                                                                                                                                                                                                                                                                                                                             |
|                               |         |         |       |             | c105513. graph_c1;c106004. graph_c0;c108042. graph_c0;c108790. graph_c0;c109140. graph_c0;c109671. graph_c0;c113248. graph_c0;c115504. graph_c0;c115711. graph_c0;c116417. graph_c0;c117822. graph_c0;c117851. graph_c0;c118665. graph_c0;c118816. graph_c0;c119325. graph_c0;c120249. graph_c0;c120576. graph_c0;c120604. graph_c0;c121742. graph_c0;c121995. graph_c0;c122721. graph_c0;c123210. graph_c0;c123220. graph_c0;c124410. graph_c0;c125155. graph_c1;c125781. graph_c0;c126509. graph_c1;c126580. graph_c0;c126605. graph_c0;c126811. graph_c0;c126934. graph_c0;c127309. graph_c0;c127792. graph_c0;c128185. graph_c0;c128547. graph_c0;c128547. graph_c1;c129333. graph_c0;c129750. graph_c0;c130060. graph_c0;c130068. graph_c0;c130187. graph_c0;c130477. graph_c0;c130684. graph_c0;c131646. graph_c1;c131799. graph_c0;c132238. graph_c0;c132359. graph_c1;c47395. graph_c0;c71123. graph_c0;c88845. graph_c0;c89200. graph_c0 |
|                               |         |         |       |             | K01188+K01188+K18447+K01188+K00844+K05350+K00012+K01177+K01176+K01051+K01051+K01051+K00847+K01188+K01184+K00844+K01051+K01188+K01051+K01188+K01835+K05350+K01188+K01051+K01176+K01051+K00012+K01177+K00975+K01193+K01187+K05349+K01188+K00705+K01188+K01188+K01193+K01051+K01087+K00688+K00847+K00688+K01193+K00688+K01176+K00696+K01051+K00847+K01051+K05350+K01188                                                                                                                                                                                                                                                                                                                                                                                                                                                                                                                                                                              |

|                                         |         |    |     |     |       |                                                                                                                                                                                                                                                                                                                                                                                                                                                                                                                                                                                                                                                                                                                                                                                                     |                                                                                                                                                                                                                                                                                                              |
|-----------------------------------------|---------|----|-----|-----|-------|-----------------------------------------------------------------------------------------------------------------------------------------------------------------------------------------------------------------------------------------------------------------------------------------------------------------------------------------------------------------------------------------------------------------------------------------------------------------------------------------------------------------------------------------------------------------------------------------------------------------------------------------------------------------------------------------------------------------------------------------------------------------------------------------------------|--------------------------------------------------------------------------------------------------------------------------------------------------------------------------------------------------------------------------------------------------------------------------------------------------------------|
| Plant hormone<br>signal<br>transduction | ko04075 | 43 | 403 | 715 | 13897 | c102167. graph_c0;c104874. graph_c0;c105109. graph_c0;c105815. graph_c0;c106087. graph_c0;c107593. graph_c0;c108427. graph_c0;c109272. graph_c0;c110148. graph_c0;c112138. graph_c0;c112179. graph_c0;c112371. graph_c0;c112578. graph_c0;c113017. graph_c0;c114656. graph_c0;c116573. graph_c0;c117033. graph_c0;c117096. graph_c0;c119187. graph_c0;c120105. graph_c1;c120546. graph_c0;c121149. graph_c0;c121691. graph_c0;c121961. graph_c0;c122051. graph_c0;c122394. graph_c0;c122713. graph_c0;c123048. graph_c0;c124285. graph_c0;c124691. graph_c0;c124750. graph_c1;c124826. graph_c0;c127036. graph_c1;c127278. graph_c0;c127580. graph_c0;c127695. graph_c0;c128432. graph_c0;c130168. graph_c0;c131976. graph_c0;c132781. graph_c0;c132990. graph_c0;c88326. graph_c0;c90004. graph_c0 | K14488+K14488+K14497+K14505+K14490+K14492+K14490+K14492+K14490+K13464+K14488+K14488+K14492+K14484+K13946+K14505+K14484+K14496+K13946+K14488+K14488+K14488+K14497+K14490+K13464+K14484+K14492+K14505+K14491+K14509+K14490+K14512+K14491+K14489+K14488+K14505+K14494+K14509+K14515+K14492+K14509+K14488+K14496 |
| Phenylpropanoid<br>biosynthesis         | ko00940 | 39 | 250 | 715 | 13897 | c101742. graph_c0;c101742. graph_c1;c105069. graph_c0;c105513. graph_c1;c106004. graph_c0;c107475. graph_c0;c108790. graph_c0;c109671. graph_c0;c111410. graph_c0;c111764. graph_c0;c114770. graph_c0;c116105. graph_c0;c116628. graph_c0;c117640. graph_c0;c118247. graph_c0;c118816. graph_c0;c119082. graph_c0;c120064. graph_c0;c120064. graph_c1;c120604. graph                                                                                                                                                                                                                                                                                                                                                                                                                                | K00083+K00083+K00430+K01188+K01188+K00430+K01188+K05350+K13065+K11188+K13066+K13065+K00430+K12356+K00430+K01188+K01904+K13066+K13066+K01188+K00430+K01188+K05350+K01188+K01904+K00430+K05349+K01188+K00083+K01188+K01188+K00430+K10775+K                                                                     |

|                   |         |    |     |     |       |                                                                                                                                                                                                                                                                                                                                                                                                                                                                                                                                                                                                                                                                                    |                                                                                                                                                                                                                                                                    |
|-------------------|---------|----|-----|-----|-------|------------------------------------------------------------------------------------------------------------------------------------------------------------------------------------------------------------------------------------------------------------------------------------------------------------------------------------------------------------------------------------------------------------------------------------------------------------------------------------------------------------------------------------------------------------------------------------------------------------------------------------------------------------------------------------|--------------------------------------------------------------------------------------------------------------------------------------------------------------------------------------------------------------------------------------------------------------------|
|                   |         |    |     |     |       | _c0;c121941. graph_c0;c121995. graph_c0;c123210. graph_c0;c123220. graph_c0;c125412. graph_c0;c125906. graph_c0;c127309. graph_c0;c127792. graph_c0;c128306. graph_c0;c128547. graph_c0;c128547. graph_c1;c130735. graph_c0;c133129. graph_c0;c133930. graph_c0;c50245. graph_c0;c86972. graph_c0;c88845. graph_c0;c89173. graph_c0;c89200. graph_c0                                                                                                                                                                                                                                                                                                                               | 00430+K00083+K11188+K05350+K09755+K01188                                                                                                                                                                                                                           |
|                   |         |    |     |     |       | c100613. graph_c0;c102566. graph_c0;c105373. graph_c0;c106243. graph_c0;c109140. graph_c0;c110055. graph_c0;c110315. graph_c0;c112914. graph_c0;c114199. graph_c0;c118522. graph_c0;c118802. graph_c0;c118938. graph_c0;c119204. graph_c0;c119582. graph_c1;c120124. graph_c0;c120249. graph_c0;c120317. graph_c0;c124334. graph_c0;c124752. graph_c0;c126079. graph_c0;c126578. graph_c0;c128281. graph_c0;c128366. graph_c0;c129490. graph_c0;c130262. graph_c0;c132024. graph_c0;c132202. graph_c0;c134376. graph_c0;c134598. graph_c0;c134680. graph_c0;c50718. graph_c0;c51688. graph_c0;c85077. graph_c0;c88872. graph_c0;c88948. graph_c0;c90012. graph_c0;c91675. graph_c0 | K00025+K00122+K00161+K00134+K00844+K01602+K00830+K00134+K01100+K00382+K00134+K05605+K05298+K01057+K01057+K00844+K01057+K01738+K00164+K00873+K00121+K01610+K01595+K00026+K13034+K01738+K02160+K01963+K01738+K00161+K01057+K01057+K00627+K01679+K13034+K01962+K00161 |
| Carbon metabolism | ko01200 | 37 | 955 | 715 | 13897 |                                                                                                                                                                                                                                                                                                                                                                                                                                                                                                                                                                                                                                                                                    |                                                                                                                                                                                                                                                                    |
|                   |         |    |     |     |       | c100604. graph_c0;c102269. graph_c0;c102533. graph_c0;c106833. graph_c0;c107031. graph_c0;c108526. graph_c1;c109164. graph_c0;c110436                                                                                                                                                                                                                                                                                                                                                                                                                                                                                                                                              | K02977+K02876+K02937+K02976+K02930+K02979+K02873+K02870+K02909+K02922+K02942+K02879+K02                                                                                                                                                                            |
| Ribosome          | ko03010 | 36 | 996 | 715 | 13897 |                                                                                                                                                                                                                                                                                                                                                                                                                                                                                                                                                                                                                                                                                    |                                                                                                                                                                                                                                                                    |

|                                             |         |    |     |     |       |                                                                                                                                                                                                                                                                                                                                                                                                                                                                                                                                                                                                    |                                                                                                                                                                                                                                                      |
|---------------------------------------------|---------|----|-----|-----|-------|----------------------------------------------------------------------------------------------------------------------------------------------------------------------------------------------------------------------------------------------------------------------------------------------------------------------------------------------------------------------------------------------------------------------------------------------------------------------------------------------------------------------------------------------------------------------------------------------------|------------------------------------------------------------------------------------------------------------------------------------------------------------------------------------------------------------------------------------------------------|
|                                             |         |    |     |     |       | . graph_c0;c113079. graph_c0;c114175. graph_c0;c117479. graph_c0;c118513. graph_c0;c119820. graph_c0;c120768. graph_c0;c123949. graph_c0;c124097. graph_c0;c124830. graph_c0;c125171. graph_c0;c125852. graph_c0;c125958. graph_c0;c129136. graph_c0;c130486. graph_c0;c131743. graph_c0;c132081. graph_c0;c132355. graph_c0;c133030. graph_c0;c133694. graph_c0;c133984. graph_c0;c134599. graph_c0;c49761. graph_c0;c55594. graph_c0;c74451. graph_c0;c77479. graph_c0;c86145. graph_c0;c90571. graph_c0;c92625. graph_c0                                                                        | 876+K02941+K02932+K02988+K02896+K02937+K02896+K02993+K02938+K02882+K02938+K02964+K02980+K02937+K02882+K02868+K02960+K02938+K02960+K02949+K02960+K02983+K02949+K02933                                                                                 |
| Protein processing in endoplasmic reticulum | ko04141 | 35 | 868 | 715 | 13897 | c102059. graph_c0;c102180. graph_c0;c106546. graph_c0;c108317. graph_c0;c108531. graph_c0;c110519. graph_c0;c110723. graph_c0;c111425. graph_c0;c115661. graph_c0;c115728. graph_c0;c116596. graph_c0;c118015. graph_c0;c120059. graph_c0;c122224. graph_c0;c122836. graph_c0;c123030. graph_c0;c123347. graph_c0;c124083. graph_c0;c125391. graph_c1;c125404. graph_c0;c129495. graph_c0;c131510. graph_c0;c131834. graph_c0;c131854. graph_c1;c132610. graph_c0;c133097. graph_c0;c134065. graph_c0;c23599. graph_c0;c23697. graph_c0;c51615. graph_c0;c52034. graph_c0;c71721. graph_c0;c71733. | K13993+K03094+K07342+K03283+K03094+K03283+K13993+K13993+K13993+K03094+K13993+K13993+K03237+K13993+K13993+K09503+K03094+K09503+K13993+K10575+K08852+K03283+K03283+K03283+K09503+K13993+K16196+K03283+K03283+K03868+K13993+K13993+K04079+K13993+K03868 |

|                             |         |    |     |     |       |                                                                                                                                                                                                                                                                                                                                                                                                                                                                                                                                                                                                                                                       |                                                                                                                                                                                                                                               |
|-----------------------------|---------|----|-----|-----|-------|-------------------------------------------------------------------------------------------------------------------------------------------------------------------------------------------------------------------------------------------------------------------------------------------------------------------------------------------------------------------------------------------------------------------------------------------------------------------------------------------------------------------------------------------------------------------------------------------------------------------------------------------------------|-----------------------------------------------------------------------------------------------------------------------------------------------------------------------------------------------------------------------------------------------|
| Plant-pathogen interaction  | ko04626 | 30 | 373 | 715 | 13897 | graph_c0;c90083. graph_c0;c97655. graph_c0<br>c100506. graph_c0;c108372. graph_c0;c108852.<br>graph_c0;c112144. graph_c0;c114370. graph_c0<br>;c115120. graph_c0;c118619. graph_c0;c118881<br>. graph_c0;c119307. graph_c0;c119888. graph_c<br>0;c121838. graph_c0;c122060. graph_c0;c12569<br>6. graph_c0;c125898. graph_c1;c127934. graph_<br>c0;c128760. graph_c0;c129591. graph_c0;c1307<br>86. graph_c0;c131652. graph_c1;c132003. graph<br>_c0;c132441. graph_c0;c132784. graph_c0;c132<br>982. graph_c1;c133874. graph_c0;c133916. grap<br>h_c0;c134003. graph_c0;c134348. graph_c0;c50<br>350. graph_c0;c71733. graph_c0;c91463. graph_<br>c0 | K13448+K13448+K13412+K02183+K<br>04368+K13448+K13448+K13448+K1<br>3412+K13412+K13459+K05391+K13<br>459+K13457+K13420+K13412+K053<br>91+K13429+K13420+K18835+K1341<br>2+K13447+K13447+K13412+K13448<br>+K05391+K13457+K13448+K04079+<br>K12795 |
| Biosynthesis of amino acids | ko01230 | 30 | 812 | 715 | 13897 | c100821. graph_c0;c102878. graph_c0;c106243.<br>graph_c0;c112408. graph_c0;c112914. graph_c0<br>;c114056. graph_c0;c117589. graph_c0;c118697<br>. graph_c0;c118802. graph_c0;c121031. graph_c<br>0;c121090. graph_c0;c122143. graph_c0;c12349<br>8. graph_c0;c123819. graph_c0;c123986. graph_<br>c0;c124334. graph_c0;c124635. graph_c0;c1259<br>56. graph_c0;c126079. graph_c0;c130262. graph<br>_c0;c132013. graph_c0;c132024. graph_c0;c133<br>161. graph_c0;c133226. graph_c0;c134598. grap<br>h_c0;c70627. graph_c0;c71676. graph_c0;c8894                                                                                                      | K00891+K15227+K00134+K13832+K<br>00134+K10206+K00620+K00611+K0<br>0134+K01817+K15227+K00052+K00<br>215+K00826+K01626+K01738+K019<br>15+K15227+K00873+K13034+K0081<br>5+K01738+K13832+K13832+K01738<br>+K01778+K15227+K13034+K01704+<br>K00891 |

|                                                    |         |    |     |     |       |                                                                                                                                                                                                                                                                                                                                                                                                                                                                                                                                                                                                                                                                                                                                                                                                                                                                                                                                                                                                                                                                                                                              |                                                                                                                                                                                                                      |
|----------------------------------------------------|---------|----|-----|-----|-------|------------------------------------------------------------------------------------------------------------------------------------------------------------------------------------------------------------------------------------------------------------------------------------------------------------------------------------------------------------------------------------------------------------------------------------------------------------------------------------------------------------------------------------------------------------------------------------------------------------------------------------------------------------------------------------------------------------------------------------------------------------------------------------------------------------------------------------------------------------------------------------------------------------------------------------------------------------------------------------------------------------------------------------------------------------------------------------------------------------------------------|----------------------------------------------------------------------------------------------------------------------------------------------------------------------------------------------------------------------|
| Glycolysis /<br>Gluconeogenesis                    | ko00010 | 27 | 448 | 715 | 13897 | 8. graph_c0;c93628. graph_c0;c95528. graph_c0<br>c102004. graph_c0;c105373. graph_c0;c106243.<br>graph_c0;c108564. graph_c0;c109130. graph_c0<br>;c109140. graph_c0;c109581. graph_c0;c111937<br>. graph_c0;c112914. graph_c0;c118522. graph_c<br>0;c118802. graph_c0;c120249. graph_c0;c12272<br>1. graph_c0;c122868. graph_c0;c126079. graph_<br>c0;c126467. graph_c0;c126578. graph_c0;c1282<br>81. graph_c0;c128735. graph_c0;c130417. graph<br>_c0;c130417. graph_c1;c132004. graph_c0;c132<br>004. graph_c1;c134543. graph_c0;c134680. grap<br>h_c0;c85077. graph_c0;c91675. graph_c0<br><br>c102361. graph_c0;c102552. graph_c0;c110588.<br>graph_c0;c112781. graph_c0;c113248. graph_c0<br>;c116417. graph_c0;c116832. graph_c0;c117822<br>. graph_c0;c117851. graph_c0;c119325. graph_c<br>0;c120576. graph_c0;c121742. graph_c0;c12285<br>6. graph_c0;c122868. graph_c0;c123853. graph_<br>c0;c124410. graph_c0;c124721. graph_c0;c1248<br>96. graph_c0;c125781. graph_c0;c126509. graph<br>_c1;c128735. graph_c0;c129750. graph_c0;c130<br>417. graph_c0;c130417. graph_c1;c132359. grap<br>h_c1;c71123. graph_c0 | K18857+K00161+K00134+K00001+K<br>01792+K00844+K18857+K01785+K0<br>0134+K00382+K00134+K00844+K01<br>835+K00128+K00873+K18857+K001<br>21+K01610+K00128+K00128+K0012<br>8+K01785+K01785+K01568+K00161<br>+K00627+K00161 |
| Pentose and<br>glucuronate<br>interconversion<br>s | ko00040 | 26 | 202 | 715 | 13897 | c102361. graph_c0;c102552. graph_c0;c110588.<br>graph_c0;c112781. graph_c0;c113248. graph_c0<br>;c116417. graph_c0;c116832. graph_c0;c117822<br>. graph_c0;c117851. graph_c0;c119325. graph_c<br>0;c120576. graph_c0;c121742. graph_c0;c12285<br>6. graph_c0;c122868. graph_c0;c123853. graph_<br>c0;c124410. graph_c0;c124721. graph_c0;c1248<br>96. graph_c0;c125781. graph_c0;c126509. graph<br>_c1;c128735. graph_c0;c129750. graph_c0;c130<br>417. graph_c0;c130417. graph_c1;c132359. grap<br>h_c1;c71123. graph_c0                                                                                                                                                                                                                                                                                                                                                                                                                                                                                                                                                                                                    | K01728+K01728+K01728+K01728+K<br>00012+K01051+K00008+K01051+K0<br>1051+K01184+K01051+K01051+K00<br>011+K00128+K01728+K01051+K017<br>28+K01728+K01051+K00012+K0012<br>8+K01051+K00128+K00128+K01051<br>+K01051        |





|                      |         |    |     |     |       |                                                                                                                                                                                                                                                                                                                                                                                                                                                                                                                                                                                                                                                                                                                                                                                                                                                                                                                                                                                                                                                                                                                                                     |                                                                                                                                                    |
|----------------------|---------|----|-----|-----|-------|-----------------------------------------------------------------------------------------------------------------------------------------------------------------------------------------------------------------------------------------------------------------------------------------------------------------------------------------------------------------------------------------------------------------------------------------------------------------------------------------------------------------------------------------------------------------------------------------------------------------------------------------------------------------------------------------------------------------------------------------------------------------------------------------------------------------------------------------------------------------------------------------------------------------------------------------------------------------------------------------------------------------------------------------------------------------------------------------------------------------------------------------------------|----------------------------------------------------------------------------------------------------------------------------------------------------|
| Purine metabolism    | ko00230 | 21 | 563 | 715 | 13897 | c0;c128678. graph_c0;c131878. graph_c0;c132914. graph_c0;c133973. graph_c0;c51066. graph_c0;c71042. graph_c0;c96247. graph_c0;c98149. graph_c0<br>c108042. graph_c0;c110950. graph_c0;c112573. graph_c0;c115938. graph_c0;c119983. graph_c0;c119994. graph_c0;c120834. graph_c0;c121893. graph_c0;c122370. graph_c0;c122721. graph_c0;c124206. graph_c0;c126079. graph_c0;c126983. graph_c0;c128678. graph_c0;c129051. graph_c0;c130274. graph_c0;c130689. graph_c1;c131570. graph_c0;c131878. graph_c0;c134357. graph_c0;c99075. graph_c0<br>c100425. graph_c0;c102019. graph_c0;c104836. graph_c0;c108164. graph_c0;c108317. graph_c0;c110519. graph_c0;c118765. graph_c0;c120921. graph_c0;c125321. graph_c0;c130121. graph_c0;c131510. graph_c0;c131834. graph_c0;c131854. graph_c1;c132365. graph_c0;c133691. graph_c0;c134621. graph_c0;c23599. graph_c0;c23697. graph_c0;c71357. graph_c0;c98951. graph_c0<br>c102094. graph_c0;c109140. graph_c0;c111937. graph_c0;c120249. graph_c0;c121255. graph_c1;c122721. graph_c0;c122856. graph_c0;c123062. graph_c0;c124235. graph_c0;c125626. graph_c0;c126811. graph_c0;c126934. graph_c0;c12933 | K18447+K10808+K03013+K03008+K03019+K03026+K01514+K01081+K00759+K01835+K03014+K00873+K10807+K10807+K02325+K01427+K00939+K01923+K10808+K02320+K00088 |
| Spliceosome          | ko03040 | 20 | 868 | 715 | 13897 | c100425. graph_c0;c102019. graph_c0;c104836. graph_c0;c108164. graph_c0;c108317. graph_c0;c110519. graph_c0;c118765. graph_c0;c120921. graph_c0;c125321. graph_c0;c130121. graph_c0;c131510. graph_c0;c131834. graph_c0;c131854. graph_c1;c132365. graph_c0;c133691. graph_c0;c134621. graph_c0;c23599. graph_c0;c23697. graph_c0;c71357. graph_c0;c98951. graph_c0<br>c102094. graph_c0;c109140. graph_c0;c111937. graph_c0;c120249. graph_c0;c121255. graph_c1;c122721. graph_c0;c122856. graph_c0;c123062. graph_c0;c124235. graph_c0;c125626. graph_c0;c126811. graph_c0;c126934. graph_c0;c12933                                                                                                                                                                                                                                                                                                                                                                                                                                                                                                                                               | K12874+K12882+K12830+K12874+K03283+K03283+K12662+K12874+K12858+K12830+K03283+K03283+K03283+K11097+K12833+K12882+K03283+K03283+K12833+K12813        |
| Galactose metabolism | ko00052 | 19 | 166 | 715 | 13897 | c100425. graph_c0;c102019. graph_c0;c104836. graph_c0;c108164. graph_c0;c108317. graph_c0;c110519. graph_c0;c118765. graph_c0;c120921. graph_c0;c125321. graph_c0;c130121. graph_c0;c131510. graph_c0;c131834. graph_c0;c131854. graph_c1;c132365. graph_c0;c133691. graph_c0;c134621. graph_c0;c23599. graph_c0;c23697. graph_c0;c71357. graph_c0;c98951. graph_c0<br>c102094. graph_c0;c109140. graph_c0;c111937. graph_c0;c120249. graph_c0;c121255. graph_c1;c122721. graph_c0;c122856. graph_c0;c123062. graph_c0;c124235. graph_c0;c125626. graph_c0;c126811. graph_c0;c126934. graph_c0;c12933                                                                                                                                                                                                                                                                                                                                                                                                                                                                                                                                               | K18819+K00844+K01785+K00844+K06617+K01835+K00011+K01784+K01784+K07407+K01193+K01187+K01193+K01193+K01785+K01785+K06617+K01784+K01784               |

|                                 |         |    |     |     |       |                                                                                                                                                                                                                                                                                                                                                                                                                                                                               |                                                                                                                               |
|---------------------------------|---------|----|-----|-----|-------|-------------------------------------------------------------------------------------------------------------------------------------------------------------------------------------------------------------------------------------------------------------------------------------------------------------------------------------------------------------------------------------------------------------------------------------------------------------------------------|-------------------------------------------------------------------------------------------------------------------------------|
| Cyanoamino acid metabolism      | ko00460 | 18 | 114 | 715 | 13897 | 3. graph_c0; c130684. graph_c0; c132004. graph_c0; c132004. graph_c1; c49856. graph_c0; c54775. graph_c0; c88590. graph_c0. c105513. graph_c1; c106004. graph_c0; c108790. graph_c0; c109671. graph_c0; c118816. graph_c0; c120604. graph_c0; c121995. graph_c0; c123210. graph_c0; c123220. graph_c0; c127309. graph_c0; c127792. graph_c0; c127844. graph_c0; c128547. graph_c0; c128547. graph_c1; c130262. graph_c0; c88845. graph_c0; c88948. graph_c0; c89200. graph_c0 | K01188+K01188+K01188+K05350+K01188+K01188+K01188+K05350+K01188+K05349+K01188+K18592+K01188+K01188+K13034+K05350+K13034+K01188 |
| alpha-Linolenic acid metabolism | ko00592 | 18 | 130 | 715 | 13897 | c102004. graph_c0; c102687. graph_c0; c109303. graph_c0; c109581. graph_c0; c115680. graph_c0; c115772. graph_c0; c118459. graph_c0; c120300. graph_c0; c121567. graph_c0; c123665. graph_c0; c124313. graph_c0; c125727. graph_c0; c126467. graph_c0; c128357. graph_c0; c129473. graph_c0; c134411. graph_c0; c134639. graph_c0; c23669. graph_c0                                                                                                                           | K18857+K00454+K08241+K18857+K10525+K01723+K01723+K05894+K01723+K10525+K10526+K08241+K18857+K10526+K00454+K00454+K00454+K00454 |
| Phenylalanine metabolism        | ko00360 | 18 | 171 | 715 | 13897 | c105069. graph_c0; c107475. graph_c0; c110715. graph_c0; c111764. graph_c0; c116628. graph_c0; c118247. graph_c0; c118423. graph_c0; c119082. graph_c0; c119172. graph_c0; c121941. graph_c0; c122229. graph_c0; c125412. graph_c0; c12590                                                                                                                                                                                                                                    | K00430+K00430+K07253+K11188+K00430+K00430+K00276+K01904+K00457+K00430+K07253+K01904+K00430+K00430+K00815+K10775+K00430+K11188 |

|                                |         |    |     |     |       |                                                                                                                                                                                                                                                                                                                                 |                                                                                                                               |
|--------------------------------|---------|----|-----|-----|-------|---------------------------------------------------------------------------------------------------------------------------------------------------------------------------------------------------------------------------------------------------------------------------------------------------------------------------------|-------------------------------------------------------------------------------------------------------------------------------|
|                                |         |    |     |     |       | 6. graph_c0;c130735. graph_c0;c132013. graph_c0;c133129. graph_c0;c133930. graph_c0;c86972. graph_c0                                                                                                                                                                                                                            |                                                                                                                               |
| Pyruvate metabolism            | ko00620 | 18 | 357 | 715 | 13897 | c100613. graph_c0;c105373. graph_c0;c118522. graph_c0;c122868. graph_c0;c126079. graph_c0;c128281. graph_c0;c128366. graph_c0;c128735. graph_c0;c129490. graph_c0;c130417. graph_c0;c130417. graph_c1;c132202. graph_c0;c134376. graph_c0;c134680. graph_c0;c85077. graph_c0;c88872. graph_c0;c90012. graph_c0;c91675. graph_c0 | K00025+K00161+K00382+K00128+K00873+K01610+K01595+K00128+K00026+K00128+K00128+K02160+K01963+K00161+K00627+K01679+K01962+K00161 |
| Ubiquitin mediated proteolysis | ko04120 | 17 | 468 | 715 | 13897 | c102180. graph_c0;c105963. graph_c0;c108531. graph_c0;c108920. graph_c0;c115011. graph_c0;c115728. graph_c0;c115856. graph_c0;c119129. graph_c0;c119687. graph_c0;c123347. graph_c0;c125404. graph_c0;c128987. graph_c0;c130696. graph_c0;c133559. graph_c0;c23919. graph_c0;c51615. graph_c0;c97655. graph_c0                  | K03094+K10144+K03094+K10144+K10144+K03094+K06688+K10583+K04506+K03094+K10575+K10581+K10581+K10144+K10573+K03868+K03868        |
| Pyrimidine metabolism          | ko00240 | 17 | 456 | 715 | 13897 | c102867. graph_c0;c110950. graph_c0;c112573. graph_c0;c114780. graph_c0;c115938. graph_c0;c119983. graph_c0;c119994. graph_c0;c119999. graph_c0;c121893. graph_c0;c123592. graph_c0;c124206. graph_c0;c126983. graph_c0;c128678. graph_c0;c129051. graph_c0;c131878. graph_c0;c134357. graph_c0;c93528. graph_c0                | K00857+K10808+K03013+K00876+K03008+K03019+K03026+K00761+K101081+K00857+K03014+K10807+K10807+K02325+K10808+K02320+K01520       |

|                                    |         |    |     |     |       |                                                                                                                                                                                                                                                                                                |                                                                                                                 |
|------------------------------------|---------|----|-----|-----|-------|------------------------------------------------------------------------------------------------------------------------------------------------------------------------------------------------------------------------------------------------------------------------------------------------|-----------------------------------------------------------------------------------------------------------------|
| Cysteine and methionine metabolism | ko00270 | 16 | 289 | 715 | 13897 | c100613. graph_c0;c108515. graph_c0;c120855. graph_c0;c121636. graph_c0;c123728. graph_c0;c124334. graph_c0;c125581. graph_c0;c125674. graph_c0;c125789. graph_c0;c129490. graph_c0;c130262. graph_c0;c130924. graph_c0;c132013. graph_c0;c132024. graph_c0;c134598. graph_c0;c88948. graph_c0 | K00025+K05933+K01761+K08963+K01762+K01738+K00547+K00547+K05933+K00026+K13034+K00558+K00815+K01738+K01738+K13034 |
| Fatty acid metabolism              | ko01212 | 16 | 268 | 715 | 13897 | c100226. graph_c0;c108824. graph_c0;c111947. graph_c0;c115084. graph_c0;c117490. graph_c0;c120878. graph_c0;c121978. graph_c0;c125610. graph_c0;c127942. graph_c0;c128312. graph_c0;c128974. graph_c0;c132202. graph_c0;c132570. graph_c0;c134376. graph_c0;c71372. graph_c0;c90012. graph_c0  | K09458+K01074+K10256+K10251+K10255+K10703+K10257+K10781+K10703+K09458+K01897+K02160+K00059+K01963+K01897+K01962 |
| mRNA surveillance pathway          | ko03015 | 16 | 452 | 715 | 13897 | c101917. graph_c0;c101974. graph_c0;c102019. graph_c0;c106824. graph_c0;c111578. graph_c0;c118482. graph_c0;c120023. graph_c0;c122748. graph_c0;c124542. graph_c0;c126315. graph_c0;c126899. graph_c0;c127188. graph_c0;c129634. graph_c0;c132292. graph_c2;c134621. graph_c0;c97867. graph_c0 | K11583+K14376+K12882+K14376+K06269+K03456+K13126+K11584+K14400+K13126+K13126+K14400+K03265+K03456+K12882+K14324 |
| Endocytosis                        | ko04144 | 16 | 472 | 715 | 13897 | c108317. graph_c0;c110519. graph_c0;c111700. graph_c0;c111740. graph_c0;c117146. graph_c0;c119051. graph_c0;c127088. graph_c0;c128997. graph_c0;c130583. graph_c1;c131314. graph_c0;c131510. graph_c0;c131834. graph_c0;c13185                                                                 | K03283+K03283+K01115+K07904+K04646+K07897+K00889+K01115+K01115+K12483+K03283+K03283+K03283+K01115+K03283+K03283 |

|                     |         |    |     |     |       |                                                                                                                                                                                                                                                                                                                                                                                                                                                                                                                                                                                                                                                                                                                                                                                                                                                                                                                                                                                                                                                                                                                                              |                                                                                                                 |
|---------------------|---------|----|-----|-----|-------|----------------------------------------------------------------------------------------------------------------------------------------------------------------------------------------------------------------------------------------------------------------------------------------------------------------------------------------------------------------------------------------------------------------------------------------------------------------------------------------------------------------------------------------------------------------------------------------------------------------------------------------------------------------------------------------------------------------------------------------------------------------------------------------------------------------------------------------------------------------------------------------------------------------------------------------------------------------------------------------------------------------------------------------------------------------------------------------------------------------------------------------------|-----------------------------------------------------------------------------------------------------------------|
| RNA transport       | ko03013 | 16 | 630 | 715 | 13897 | 4. graph_c1;c133450. graph_c0;c23599. graph_c0;c23697. graph_c0<br>c102019. graph_c0;c110008. graph_c0;c114119. graph_c0;c120023. graph_c0;c120059. graph_c0;c120893. graph_c0;c125991. graph_c0;c126315. graph_c0;c126899. graph_c0;c131315. graph_c0;c131752. graph_c0;c132224. graph_c2;c133101. graph_c0;c134621. graph_c0;c97352. graph_c0;c97867. graph_c0<br>c100128. graph_c0;c107088. graph_c0;c107179. graph_c0;c120141. graph_c0;c122529. graph_c0;c124921. graph_c0;c125492. graph_c0;c126976. graph_c0;c130722. graph_c0;c131924. graph_c1;c50756. graph_c0;c71236. graph_c0;c71464. graph_c0;c95758. graph_c0;c97392. graph_c0<br>c108872. graph_c0;c116129. graph_c0;c118291. graph_c0;c118790. graph_c0;c121683. graph_c0;c126496. graph_c0;c128517. graph_c0;c129051. graph_c0;c130511. graph_c1;c133355. graph_c0;c133907. graph_c0;c133947. graph_c0;c134357. graph_c0;c92680. graph_c0<br>c102004. graph_c0;c108564. graph_c0;c109581. graph_c0;c110715. graph_c0;c118423. graph_c0;c119172. graph_c0;c122229. graph_c0;c126467. graph_c0;c126578. graph_c0;c130866. graph_c0;c131275. graph_c0;c132013. graph_c0;c23725 | K12882+K03251+K14298+K13126+K03237+K12160+K03231+K13126+K13126+K14312+K03250+K14288+K18213+K12882+K12160+K14324 |
| Photosynthesis      | ko00195 | 15 | 144 | 715 | 13897 | K02115+K03542+K02115+K02707+K02109+K02694+K02109+K02113+K02710+K02693+K02721+K02695+K08905+K02636+K02717                                                                                                                                                                                                                                                                                                                                                                                                                                                                                                                                                                                                                                                                                                                                                                                                                                                                                                                                                                                                                                     |                                                                                                                 |
| DNA replication     | ko03030 | 14 | 216 | 715 | 13897 | K10745+K10755+K02541+K10740+K10745+K02212+K07466+K02325+K02542+K10747+K02210+K02209+K02320+K10740                                                                                                                                                                                                                                                                                                                                                                                                                                                                                                                                                                                                                                                                                                                                                                                                                                                                                                                                                                                                                                            |                                                                                                                 |
| Tyrosine metabolism | ko00350 | 14 | 121 | 715 | 13897 | K18857+K00001+K18857+K07253+K00276+K00457+K07253+K18857+K00121+K01592+K00451+K00815+K01592+K01592                                                                                                                                                                                                                                                                                                                                                                                                                                                                                                                                                                                                                                                                                                                                                                                                                                                                                                                                                                                                                                            |                                                                                                                 |

|                                      |         |    |     |     |       |                                                                                                                                                                                                                                                                                                                                                                                                                                                                                                                                                                                                                                                                                                                                                                                                                                                                                                                                                                                                                                                                                                                                                                                        |                                                                                                                                                                                                                                                                                                                                                                                                                                                                                                               |
|--------------------------------------|---------|----|-----|-----|-------|----------------------------------------------------------------------------------------------------------------------------------------------------------------------------------------------------------------------------------------------------------------------------------------------------------------------------------------------------------------------------------------------------------------------------------------------------------------------------------------------------------------------------------------------------------------------------------------------------------------------------------------------------------------------------------------------------------------------------------------------------------------------------------------------------------------------------------------------------------------------------------------------------------------------------------------------------------------------------------------------------------------------------------------------------------------------------------------------------------------------------------------------------------------------------------------|---------------------------------------------------------------------------------------------------------------------------------------------------------------------------------------------------------------------------------------------------------------------------------------------------------------------------------------------------------------------------------------------------------------------------------------------------------------------------------------------------------------|
| Terpenoid backbone biosynthesis      | ko00900 | 13 | 155 | 715 | 13897 | . graph_c0;c23725. graph_c1<br>c108010. graph_c1;c108150. graph_c0;c112284.<br>graph_c0;c122587. graph_c0;c123354. graph_c0<br>;c123699. graph_c0;c124462. graph_c0;c124505<br>. graph_c0;c125410. graph_c0;c127716. graph_c<br>0;c127762. graph_c1;c81933. graph_c0;c88832.<br>graph_c0<br>c109491. graph_c0;c116122. graph_c0;c116599.<br>graph_c1;c116900. graph_c0;c120023. graph_c0<br>;c122547. graph_c0;c126315. graph_c0;c126899<br>. graph_c0;c127472. graph_c0;c128434. graph_c<br>0;c130826. graph_c0;c131538. graph_c1;c13421<br>3. graph_c0<br>c105872. graph_c0;c111700. graph_c0;c120920.<br>graph_c0;c121925. graph_c0;c124631. graph_c0<br>;c127052. graph_c0;c128997. graph_c0;c130294<br>. graph_c0;c130583. graph_c1;c133450. graph_c<br>0;c70983. graph_c0;c93485. graph_c0<br>c100231. graph_c0;c115679. graph_c0;c119134.<br>graph_c1;c124424. graph_c0;c124583. graph_c0<br>;c125472. graph_c0;c127594. graph_c0;c131711<br>. graph_c0;c86343. graph_c0;c88162. graph_c0;<br>c97209. graph_c0;c99637. graph_c1<br>c104104. graph_c0;c108042. graph_c0;c109140.<br>graph_c0;c114913. graph_c0;c116832. graph_c0<br>;c118665. graph_c0;c118742. graph_c0;c120249 | K00787+K01662+K01641+K15889+K<br>11778+K05955+K13789+K00869+K1<br>0960+K00587+K11778+K00021+K00<br>021<br>K04077+K12602+K12593+K12619+K<br>13126+K14442+K13126+K13126+K0<br>4043+K12580+K12603+K12619+K04<br>077<br>K06130+K01115+K08730+K06130+K<br>06129+K13508+K01115+K13508+K0<br>1115+K01115+K13508+K06130<br>K13356+K17991+K15400+K15404+K<br>15398+K15403+K17991+K15404+K1<br>5398+K13356+K13356+K13356<br>K00895+K18447+K00844+K00895+K<br>00008+K00847+K00895+K00844+K0<br>0011+K00847+K00966+K00847 |
| RNA degradation                      | ko03018 | 13 | 419 | 715 | 13897 |                                                                                                                                                                                                                                                                                                                                                                                                                                                                                                                                                                                                                                                                                                                                                                                                                                                                                                                                                                                                                                                                                                                                                                                        |                                                                                                                                                                                                                                                                                                                                                                                                                                                                                                               |
| Glycerophospholipid metabolism       | ko00564 | 12 | 243 | 715 | 13897 |                                                                                                                                                                                                                                                                                                                                                                                                                                                                                                                                                                                                                                                                                                                                                                                                                                                                                                                                                                                                                                                                                                                                                                                        |                                                                                                                                                                                                                                                                                                                                                                                                                                                                                                               |
| Cutin, suberine and wax biosynthesis | ko00073 | 12 | 60  | 715 | 13897 |                                                                                                                                                                                                                                                                                                                                                                                                                                                                                                                                                                                                                                                                                                                                                                                                                                                                                                                                                                                                                                                                                                                                                                                        |                                                                                                                                                                                                                                                                                                                                                                                                                                                                                                               |
| Fructose and mannose metabolism      | ko00051 | 12 | 201 | 715 | 13897 |                                                                                                                                                                                                                                                                                                                                                                                                                                                                                                                                                                                                                                                                                                                                                                                                                                                                                                                                                                                                                                                                                                                                                                                        |                                                                                                                                                                                                                                                                                                                                                                                                                                                                                                               |

|                                                     |         |    |     |     |       |                                                                                                                                                                                                                                                                                                                                                                                                                                                                                                                                                                                                                                                                                                                                                                                                                                                                                                                                                                                                                                                                                                                    |                                                                                     |
|-----------------------------------------------------|---------|----|-----|-----|-------|--------------------------------------------------------------------------------------------------------------------------------------------------------------------------------------------------------------------------------------------------------------------------------------------------------------------------------------------------------------------------------------------------------------------------------------------------------------------------------------------------------------------------------------------------------------------------------------------------------------------------------------------------------------------------------------------------------------------------------------------------------------------------------------------------------------------------------------------------------------------------------------------------------------------------------------------------------------------------------------------------------------------------------------------------------------------------------------------------------------------|-------------------------------------------------------------------------------------|
| Arginine and proline metabolism                     | ko00330 | 12 | 287 | 715 | 13897 | . graph_c0;c122856. graph_c0;c130187. graph_c0;c130464. graph_c0;c47395. graph_c0c117589. graph_c0;c118697. graph_c0;c119465. graph_c0;c122868. graph_c0;c124635. graph_c0;c126751. graph_c0;c128735. graph_c0;c129144. graph_c0;c130274. graph_c0;c130417. graph_c0;c130417. graph_c1;c132914. graph_c0c100821. graph_c0;c102878. graph_c0;c112408. graph_c0;c121031. graph_c0;c121090. graph_c0;c123986. graph_c0;c125956. graph_c0;c132013. graph_c0;c133161. graph_c0;c133226. graph_c0;c71676. graph_c0;c95528. graph_c0c100613. graph_c0;c105373. graph_c0;c118522. graph_c0;c120797. graph_c0;c124752. graph_c0;c128281. graph_c0;c129490. graph_c0;c134680. graph_c0;c85077. graph_c0;c88872. graph_c0;c91675. graph_c0c100231. graph_c0;c110315. graph_c0;c122610. graph_c0;c123153. graph_c0;c124505. graph_c0;c125133. graph_c0;c128974. graph_c0;c71372. graph_c0;c88162. graph_c0;c97209. graph_c0;c99637. graph_c1c102004. graph_c0;c108564. graph_c0;c109581. graph_c0;c122868. graph_c0;c126467. graph_c0;c126578. graph_c0;c128735. graph_c0;c128974. graph_c0;c130417. graph_c0;c130417. graph_c | K00620+K00611+K00261+K00128+K01915+K00294+K00128+K01583+K01427+K00128+K00128+K01581 |
| Phenylalanine, tyrosine and tryptophan biosynthesis | ko00400 | 12 | 117 | 715 | 13897 | . graph_c0;c122856. graph_c0;c130187. graph_c0;c130464. graph_c0;c47395. graph_c0c117589. graph_c0;c118697. graph_c0;c119465. graph_c0;c122868. graph_c0;c124635. graph_c0;c126751. graph_c0;c128735. graph_c0;c129144. graph_c0;c130274. graph_c0;c130417. graph_c0;c130417. graph_c1;c132914. graph_c0c100821. graph_c0;c102878. graph_c0;c112408. graph_c0;c121031. graph_c0;c121090. graph_c0;c123986. graph_c0;c125956. graph_c0;c132013. graph_c0;c133161. graph_c0;c133226. graph_c0;c71676. graph_c0;c95528. graph_c0c100613. graph_c0;c105373. graph_c0;c118522. graph_c0;c120797. graph_c0;c124752. graph_c0;c128281. graph_c0;c129490. graph_c0;c134680. graph_c0;c85077. graph_c0;c88872. graph_c0;c91675. graph_c0c100231. graph_c0;c110315. graph_c0;c122610. graph_c0;c123153. graph_c0;c124505. graph_c0;c125133. graph_c0;c128974. graph_c0;c71372. graph_c0;c88162. graph_c0;c97209. graph_c0;c99637. graph_c1c102004. graph_c0;c108564. graph_c0;c109581. graph_c0;c122868. graph_c0;c126467. graph_c0;c126578. graph_c0;c128735. graph_c0;c128974. graph_c0;c130417. graph_c0;c130417. graph_c | K00891+K15227+K13832+K01817+K15227+K01626+K15227+K00815+K13832+K13832+K15227+K00891 |
| Citrate cycle (TCA cycle)                           | ko00020 | 11 | 304 | 715 | 13897 | . graph_c0;c122856. graph_c0;c130187. graph_c0;c130464. graph_c0;c47395. graph_c0c117589. graph_c0;c118697. graph_c0;c119465. graph_c0;c122868. graph_c0;c124635. graph_c0;c126751. graph_c0;c128735. graph_c0;c129144. graph_c0;c130274. graph_c0;c130417. graph_c0;c130417. graph_c1;c132914. graph_c0c100821. graph_c0;c102878. graph_c0;c112408. graph_c0;c121031. graph_c0;c121090. graph_c0;c123986. graph_c0;c125956. graph_c0;c132013. graph_c0;c133161. graph_c0;c133226. graph_c0;c71676. graph_c0;c95528. graph_c0c100613. graph_c0;c105373. graph_c0;c118522. graph_c0;c120797. graph_c0;c124752. graph_c0;c128281. graph_c0;c129490. graph_c0;c134680. graph_c0;c85077. graph_c0;c88872. graph_c0;c91675. graph_c0c100231. graph_c0;c110315. graph_c0;c122610. graph_c0;c123153. graph_c0;c124505. graph_c0;c125133. graph_c0;c128974. graph_c0;c71372. graph_c0;c88162. graph_c0;c97209. graph_c0;c99637. graph_c1c102004. graph_c0;c108564. graph_c0;c109581. graph_c0;c122868. graph_c0;c126467. graph_c0;c126578. graph_c0;c128735. graph_c0;c128974. graph_c0;c130417. graph_c0;c130417. graph_c | K00025+K00161+K00382+K01648+K00164+K01610+K00026+K00161+K00627+K01679+K00161        |
| Peroxisome                                          | ko04146 | 11 | 287 | 715 | 13897 | . graph_c0;c122856. graph_c0;c130187. graph_c0;c130464. graph_c0;c47395. graph_c0c117589. graph_c0;c118697. graph_c0;c119465. graph_c0;c122868. graph_c0;c124635. graph_c0;c126751. graph_c0;c128735. graph_c0;c129144. graph_c0;c130274. graph_c0;c130417. graph_c0;c130417. graph_c1;c132914. graph_c0c100821. graph_c0;c102878. graph_c0;c112408. graph_c0;c121031. graph_c0;c121090. graph_c0;c123986. graph_c0;c125956. graph_c0;c132013. graph_c0;c133161. graph_c0;c133226. graph_c0;c71676. graph_c0;c95528. graph_c0c100613. graph_c0;c105373. graph_c0;c118522. graph_c0;c120797. graph_c0;c124752. graph_c0;c128281. graph_c0;c129490. graph_c0;c134680. graph_c0;c85077. graph_c0;c88872. graph_c0;c91675. graph_c0c100231. graph_c0;c110315. graph_c0;c122610. graph_c0;c123153. graph_c0;c124505. graph_c0;c125133. graph_c0;c128974. graph_c0;c71372. graph_c0;c88162. graph_c0;c97209. graph_c0;c99637. graph_c1c102004. graph_c0;c108564. graph_c0;c109581. graph_c0;c122868. graph_c0;c126467. graph_c0;c126578. graph_c0;c128735. graph_c0;c128974. graph_c0;c130417. graph_c0;c130417. graph_c | K13356+K00830+K01640+K13346+K00869+K13348+K01897+K01897+K13356+K13356+K13356        |
| Fatty acid degradation                              | ko00071 | 11 | 197 | 715 | 13897 | . graph_c0;c122856. graph_c0;c130187. graph_c0;c130464. graph_c0;c47395. graph_c0c117589. graph_c0;c118697. graph_c0;c119465. graph_c0;c122868. graph_c0;c124635. graph_c0;c126751. graph_c0;c128735. graph_c0;c129144. graph_c0;c130274. graph_c0;c130417. graph_c0;c130417. graph_c1;c132914. graph_c0c100821. graph_c0;c102878. graph_c0;c112408. graph_c0;c121031. graph_c0;c121090. graph_c0;c123986. graph_c0;c125956. graph_c0;c132013. graph_c0;c133161. graph_c0;c133226. graph_c0;c71676. graph_c0;c95528. graph_c0c100613. graph_c0;c105373. graph_c0;c118522. graph_c0;c120797. graph_c0;c124752. graph_c0;c128281. graph_c0;c129490. graph_c0;c134680. graph_c0;c85077. graph_c0;c88872. graph_c0;c91675. graph_c0c100231. graph_c0;c110315. graph_c0;c122610. graph_c0;c123153. graph_c0;c124505. graph_c0;c125133. graph_c0;c128974. graph_c0;c71372. graph_c0;c88162. graph_c0;c97209. graph_c0;c99637. graph_c1c102004. graph_c0;c108564. graph_c0;c109581. graph_c0;c122868. graph_c0;c126467. graph_c0;c126578. graph_c0;c128735. graph_c0;c128974. graph_c0;c130417. graph_c0;c130417. graph_c | K18857+K00001+K18857+K00128+K18857+K00121+K00128+K01897+K00128+K00128+K01897        |



|                                                      |         |    |     |     |       |                                                                                                                                                                                                                                                                                                                                                                                                                                                                                                                                                                                                                                                                                                                                                                                                                                                                                                                                                                                                                                                                                                                                                                                                                                                                               |                                                                                                                                                                                                                                                                                                                                                                                                                                                                                                                        |
|------------------------------------------------------|---------|----|-----|-----|-------|-------------------------------------------------------------------------------------------------------------------------------------------------------------------------------------------------------------------------------------------------------------------------------------------------------------------------------------------------------------------------------------------------------------------------------------------------------------------------------------------------------------------------------------------------------------------------------------------------------------------------------------------------------------------------------------------------------------------------------------------------------------------------------------------------------------------------------------------------------------------------------------------------------------------------------------------------------------------------------------------------------------------------------------------------------------------------------------------------------------------------------------------------------------------------------------------------------------------------------------------------------------------------------|------------------------------------------------------------------------------------------------------------------------------------------------------------------------------------------------------------------------------------------------------------------------------------------------------------------------------------------------------------------------------------------------------------------------------------------------------------------------------------------------------------------------|
| Photosynthesis                                       |         |    |     |     |       | 1; c71372. graph_c0<br>c102634. graph_c0; c105640. graph_c0; c106848.<br>graph_c0; c109210. graph_c0; c114287. graph_c0<br>; c123544. graph_c0; c46372. graph_c0; c71681. g<br>raph_c0; c89853. graph_c0; c89965. graph_c0<br>c112284. graph_c0; c118522. graph_c0; c118938.<br>graph_c0; c122610. graph_c0; c122868. graph_c0<br>; c123819. graph_c0; c128735. graph_c0; c130417<br>. graph_c0; c130417. graph_c1; c97615. graph_c0<br>c102035. graph_c0; c102425. graph_c0; c105653.<br>graph_c0; c111410. graph_c0; c116105. graph_c0<br>; c124882. graph_c0; c128275. graph_c0; c129786<br>. graph_c1; c93168. graph_c0; c94554. graph_c0<br>c122856. graph_c0; c122868. graph_c0; c125264.<br>graph_c0; c125626. graph_c0; c127052. graph_c0<br>; c128735. graph_c0; c130294. graph_c0; c130417<br>. graph_c0; c130417. graph_c1; c70983. graph_c0<br>c100589. graph_c0; c105010. graph_c0; c106546.<br>graph_c0; c113632. graph_c0; c119051. graph_c0<br>; c121921. graph_c0; c132440. graph_c0; c70889.<br>graph_c0; c89047. graph_c0; c97672. graph_c0<br>c100613. graph_c0; c106243. graph_c0; c110055.<br>graph_c0; c112914. graph_c0; c114199. graph_c0<br>; c118802. graph_c0; c119204. graph_c0; c128281<br>. graph_c0; c128366. graph_c0; c129490. graph_c<br>0 | K14172+K08917+K08909+K08912+K<br>08908+K08912+K08913+K08913+K0<br>8908+K08913<br><br>K01641+K00382+K05605+K01640+K<br>00128+K00826+K00128+K00128+K0<br>0128+K00253<br><br>K05278+K00660+K01859+K13065+K<br>13065+K05277+K05280+K00475+K0<br>0660+K05278<br><br>K00011+K00128+K11155+K07407+K<br>13508+K00128+K13508+K00128+K0<br>0128+K13508<br><br>K04392+K02152+K07342+K07375+K<br>07897+K02150+K08492+K07374+K0<br>7374+K07375<br><br>K00025+K00134+K01602+K00134+K<br>01100+K00134+K05298+K01610+K0<br>1595+K00026 |
| - antenna<br>proteins                                | ko00196 | 10 | 52  | 715 | 13897 |                                                                                                                                                                                                                                                                                                                                                                                                                                                                                                                                                                                                                                                                                                                                                                                                                                                                                                                                                                                                                                                                                                                                                                                                                                                                               |                                                                                                                                                                                                                                                                                                                                                                                                                                                                                                                        |
| Valine, leucine<br>and isoleucine<br>degradation     | ko00280 | 10 | 223 | 715 | 13897 |                                                                                                                                                                                                                                                                                                                                                                                                                                                                                                                                                                                                                                                                                                                                                                                                                                                                                                                                                                                                                                                                                                                                                                                                                                                                               |                                                                                                                                                                                                                                                                                                                                                                                                                                                                                                                        |
| Flavonoid<br>biosynthesis                            | ko00941 | 10 | 64  | 715 | 13897 |                                                                                                                                                                                                                                                                                                                                                                                                                                                                                                                                                                                                                                                                                                                                                                                                                                                                                                                                                                                                                                                                                                                                                                                                                                                                               |                                                                                                                                                                                                                                                                                                                                                                                                                                                                                                                        |
| Glycerolipid<br>metabolism                           | ko00561 | 10 | 191 | 715 | 13897 |                                                                                                                                                                                                                                                                                                                                                                                                                                                                                                                                                                                                                                                                                                                                                                                                                                                                                                                                                                                                                                                                                                                                                                                                                                                                               |                                                                                                                                                                                                                                                                                                                                                                                                                                                                                                                        |
| Phagosome                                            | ko04145 | 10 | 348 | 715 | 13897 |                                                                                                                                                                                                                                                                                                                                                                                                                                                                                                                                                                                                                                                                                                                                                                                                                                                                                                                                                                                                                                                                                                                                                                                                                                                                               |                                                                                                                                                                                                                                                                                                                                                                                                                                                                                                                        |
| Carbon fixation<br>in<br>photosynthetic<br>organisms | ko00710 | 10 | 282 | 715 | 13897 |                                                                                                                                                                                                                                                                                                                                                                                                                                                                                                                                                                                                                                                                                                                                                                                                                                                                                                                                                                                                                                                                                                                                                                                                                                                                               |                                                                                                                                                                                                                                                                                                                                                                                                                                                                                                                        |

|                                   |         |   |     |     |       |                                                                                                                                                                 |                                                                |
|-----------------------------------|---------|---|-----|-----|-------|-----------------------------------------------------------------------------------------------------------------------------------------------------------------|----------------------------------------------------------------|
| Nucleotide excision repair        | ko03420 | 9 | 225 | 715 | 13897 | c116129. graph_c0;c118790. graph_c0;c128517. graph_c0;c129051. graph_c0;c133355. graph_c0;c134063. graph_c0;c51615. graph_c0;c92680. graph_c0;c97655. graph_c0  | K10755+K10740+K07466+K02325+K10747+K10848+K03868+K10740+K03868 |
| Fatty acid biosynthesis           | ko00061 | 9 | 136 | 715 | 13897 | c100226. graph_c0;c125610. graph_c0;c128312. graph_c0;c128974. graph_c0;c132202. graph_c0;c132570. graph_c0;c134376. graph_c0;c71372. graph_c0;c90012. graph_c0 | K09458+K10781+K09458+K01897+K02160+K00059+K01963+K01897+K01962 |
| Ascorbate and aldarate metabolism | ko00053 | 8 | 134 | 715 | 13897 | c113248. graph_c0;c117257. graph_c0;c119013. graph_c0;c122868. graph_c0;c126509. graph_c1;c128735. graph_c0;c130417. graph_c0;c130417. graph_c1                 | K00012+K10046+K00469+K00128+K00012+K00128+K00128+K00128        |
| Ribosome biogenesis in eukaryotes | ko03008 | 8 | 379 | 715 | 13897 | c101856. graph_c0;c102431. graph_c0;c102485. graph_c0;c116289. graph_c0;c116900. graph_c0;c130536. graph_c0;c131538. graph_c1;c132640. graph_c1                 | K13288+K03115+K14568+K14521+K12619+K11131+K12619+K14567        |
| Circadian rhythm - plant          | ko04712 | 8 | 88  | 715 | 13897 | c102425. graph_c0;c102431. graph_c0;c112186. graph_c0;c125387. graph_c0;c126452. graph_c1;c130328. graph_c0;c130482. graph_c0;c93168. graph_c0                  | K00660+K03115+K16166+K12127+K12130+K12129+K12118+K00660        |
| Homologous recombination          | ko03440 | 8 | 157 | 715 | 13897 | c118790. graph_c0;c123433. graph_c0;c124099. graph_c0;c128517. graph_c0;c129332. graph_c0;c133309. graph_c0;c133809. graph_c0;c92680. graph_c0                  | K10740+K10875+K03553+K07466+K10879+K08775+K08775+K10740        |
| Sulfur metabolism                 | ko00920 | 7 | 92  | 715 | 13897 | c122665. graph_c0;c124334. graph_c0;c126398. graph_c0;c130262. graph_c0;c132024. graph_c0                                                                       | K05907+K01738+K05907+K13034+K01738+K01738+K13034               |

|                                                     |         |   |     |     |       |                                                                                                                                                                     |                                                      |
|-----------------------------------------------------|---------|---|-----|-----|-------|---------------------------------------------------------------------------------------------------------------------------------------------------------------------|------------------------------------------------------|
| Nitrogen metabolism                                 | ko00910 | 7 | 100 | 715 | 13897 | ;c134598.graph_c0;c88948.graph_c0<br>c107127.graph_c0;c112691.graph_c0;c119465.<br>graph_c0;c122414.graph_c0;c124635.graph_c0<br>;c124742.graph_c0;c130648.graph_c0 | K01674+K01725+K00261+K02575+K<br>01915+K00366+K02575 |
| Biosynthesis of unsaturated fatty acids             | ko01040 | 7 | 111 | 715 | 13897 | c111947.graph_c0;c115084.graph_c0;c117490.<br>graph_c0;c120878.graph_c0;c121978.graph_c0<br>;c127942.graph_c0;c132570.graph_c0                                      | K10256+K10251+K10255+K10703+K<br>10257+K10703+K00059 |
| Fatty acid elongation                               | ko00062 | 7 | 86  | 715 | 13897 | c108824.graph_c0;c115084.graph_c0;c120878.<br>graph_c0;c123016.graph_c0;c126407.graph_c0<br>;c127942.graph_c0;c70542.graph_c0                                       | K01074+K10251+K10703+K15397+K<br>15397+K10703+K15397 |
| Tryptophan metabolism                               | ko00380 | 7 | 126 | 715 | 13897 | c118570.graph_c0;c122868.graph_c0;c124752.<br>graph_c0;c127788.graph_c0;c128735.graph_c0<br>;c130417.graph_c0;c130417.graph_c1                                      | K11816+K00128+K00164+K11816+K<br>00128+K00128+K00128 |
| Ubiquinone and other terpenoid-quinone biosynthesis | ko00130 | 7 | 74  | 715 | 13897 | c110889.graph_c0;c118844.graph_c0;c119082.<br>graph_c0;c119172.graph_c0;c123577.graph_c0<br>;c125412.graph_c0;c132013.graph_c0                                      | K03183+K14760+K01904+K00457+K<br>02552+K01904+K00815 |
| Glyoxylate and dicarboxylate metabolism             | ko00630 | 7 | 252 | 715 | 13897 | c100613.graph_c0;c102566.graph_c0;c110055.<br>graph_c0;c110315.graph_c0;c117685.graph_c0<br>;c124635.graph_c0;c129490.graph_c0                                      | K00025+K00122+K01602+K00830+K<br>15919+K01915+K00026 |
| beta-Alanine metabolism                             | ko00410 | 7 | 176 | 715 | 13897 | c118423.graph_c0;c118938.graph_c0;c122868.<br>graph_c0;c128735.graph_c0;c129360.graph_c0<br>;c130417.graph_c0;c130417.graph_c1                                      | K00276+K05605+K00128+K00128+K<br>01918+K00128+K00128 |
| Pentose phosphate pathway                           | ko00030 | 6 | 196 | 715 | 13897 | c119582.graph_c1;c120124.graph_c0;c120317.<br>graph_c0;c122721.graph_c0;c50718.graph_c0;<br>c51688.graph_c0                                                         | K01057+K01057+K01057+K01835+K<br>01057+K01057        |

|                                                      |         |   |     |     |       |                                                                                                               |                                               |
|------------------------------------------------------|---------|---|-----|-----|-------|---------------------------------------------------------------------------------------------------------------|-----------------------------------------------|
| Lysine<br>degradation                                | ko00310 | 6 | 136 | 715 | 13897 | c109846.graph_c0;c122868.graph_c0;c124752.<br>graph_c0;c128735.graph_c0;c130417.graph_c0<br>;c130417.graph_c1 | K14157+K00128+K00164+K00128+K<br>00128+K00128 |
| Mismatch repair                                      | ko03430 | 6 | 132 | 715 | 13897 | c116129.graph_c0;c118790.graph_c0;c128517.<br>graph_c0;c132924.graph_c0;c133355.graph_c0<br>;c92680.graph_c0  | K10755+K10740+K07466+K10858+K<br>10747+K10740 |
| Porphyrin and<br>chlorophyll<br>metabolism           | ko00860 | 6 | 131 | 715 | 13897 | c123143.graph_c1;c125410.graph_c0;c127890.<br>graph_c0;c127890.graph_c1;c130025.graph_c0<br>;c98055.graph_c0  | K03428+K10960+K03403+K03403+K<br>13071+K03428 |
| Thiamine<br>metabolism                               | ko00730 | 6 | 45  | 715 | 13897 | c108150.graph_c0;c112666.graph_c0;c117167.<br>graph_c0;c121244.graph_c0;c127214.graph_c1<br>;c127921.graph_c0 | K01662+K03146+K04487+K03146+K<br>04487+K00878 |
| Proteasome                                           | ko03050 | 5 | 264 | 715 | 13897 | c116158.graph_c0;c118618.graph_c0;c121189.<br>graph_c0;c130122.graph_c0;c88678.graph_c0                       | K02728+K02727+K03062+K03062+K<br>02734        |
| Linoleic acid<br>metabolism                          | ko00591 | 5 | 39  | 715 | 13897 | c102687.graph_c0;c129473.graph_c0;c134411.<br>graph_c0;c134639.graph_c0;c23669.graph_c0                       | K00454+K00454+K00454+K00454+K<br>00454        |
| Glycine, serine<br>and threonine<br>metabolism       | ko00260 | 5 | 226 | 715 | 13897 | c110315.graph_c0;c116989.graph_c0;c117685.<br>graph_c0;c118423.graph_c0;c118522.graph_c0                      | K00830+K00827+K15919+K00276+K<br>00382        |
| Alanine,<br>aspartate and<br>glutamate<br>metabolism | ko00250 | 5 | 240 | 715 | 13897 | c110315.graph_c0;c116989.graph_c0;c119465.<br>graph_c0;c124635.graph_c0;c126751.graph_c0                      | K00830+K00827+K00261+K01915+K<br>00294        |
| Carotenoid<br>biosynthesis                           | ko00906 | 5 | 64  | 715 | 13897 | c116858.graph_c0;c121850.graph_c0;c122440.<br>graph_c0;c91224.graph_c0;c95941.graph_c0                        | K02291+K02293+K09840+K09843+K<br>09843        |
| Brassinosteroid                                      | ko00905 | 5 | 20  | 715 | 13897 | c105790.graph_c0;c118316.graph_c0;c119899.                                                                    | K12637+K09587+K12638+K15639+K                 |

|                                              |         |   |     |     |       |                                                                                          |                                        |
|----------------------------------------------|---------|---|-----|-----|-------|------------------------------------------------------------------------------------------|----------------------------------------|
| biosynthesis                                 |         |   |     |     |       | graph_c0;c120722.graph_c0;c131529.graph_c0                                               | 15639                                  |
| Isoquinoline<br>alkaloid<br>biosynthesis     | ko00950 | 5 | 54  | 715 | 13897 | c118423.graph_c0;c130866.graph_c0;c132013.<br>graph_c0;c23725.graph_c0;c23725.graph_c1   | K00276+K01592+K00815+K01592+K<br>01592 |
| Folate<br>biosynthesis                       | ko00790 | 5 | 47  | 715 | 13897 | c117198.graph_c0;c125242.graph_c0;c126629.<br>graph_c0;c131644.graph_c0;c86038.graph_c0  | K03635+K03639+K18482+K13950+K<br>13941 |
| Other glycan<br>degradation                  | ko00511 | 5 | 81  | 715 | 13897 | c104972.graph_c0;c123951.graph_c0;c129180.<br>graph_c0;c133065.graph_c0;c94189.graph_c0  | K15923+K01191+K01191+K01191+K<br>01191 |
| ABC<br>transporters                          | ko02010 | 5 | 155 | 715 | 13897 | c119157.graph_c0;c126614.graph_c0;c130859.<br>graph_c0;c132418.graph_c0;c134352.graph_c0 | K05658+K05658+K05658+K05658+K<br>05658 |
| RNA polymerase                               | ko03020 | 5 | 150 | 715 | 13897 | c112573.graph_c0;c115938.graph_c0;c119983.<br>graph_c0;c119994.graph_c0;c124206.graph_c0 | K03013+K03008+K03019+K03026+K<br>03014 |
| Zeatin<br>biosynthesis                       | ko00908 | 5 | 19  | 715 | 13897 | c124810.graph_c0;c130317.graph_c0;c130652.<br>graph_c1;c131011.graph_c0;c93206.graph_c0  | K00279+K00279+K10717+K00279+K<br>13495 |
| Biotin<br>metabolism                         | ko00780 | 5 | 39  | 715 | 13897 | c100226.graph_c0;c111496.graph_c0;c124338.<br>graph_c0;c128312.graph_c0;c132570.graph_c0 | K09458+K01012+K00652+K09458+K<br>00059 |
| Steroid<br>biosynthesis                      | ko00100 | 4 | 81  | 715 | 13897 | c101929.graph_c0;c124637.graph_c0;c125112.<br>graph_c0;c127277.graph_c0                  | K01824+K01853+K14423+K00511            |
| Inositol<br>phosphate<br>metabolism          | ko00562 | 4 | 196 | 715 | 13897 | c106470.graph_c0;c119013.graph_c0;c120471.<br>graph_c0;c127088.graph_c0                  | K05857+K00469+K00915+K00889            |
| Phosphatidylyno<br>sitol signaling<br>system | ko04070 | 4 | 194 | 715 | 13897 | c106470.graph_c0;c112144.graph_c0;c120471.<br>graph_c0;c127088.graph_c0                  | K05857+K02183+K00915+K00889            |
| 2-Oxocarboxylic<br>acid metabolism           | ko01210 | 4 | 216 | 715 | 13897 | c117589.graph_c0;c122143.graph_c0;c123819.<br>graph_c0;c93628.graph_c0                   | K00620+K00052+K00826+K01704            |

|                                                        |         |   |     |     |       |                                                                         |                             |
|--------------------------------------------------------|---------|---|-----|-----|-------|-------------------------------------------------------------------------|-----------------------------|
| Sulfur relay system                                    | ko04122 | 4 | 37  | 715 | 13897 | c117167. graph_c0;c117198. graph_c0;c125242. graph_c0;c127214. graph_c1 | K04487+K03635+K03639+K04487 |
| Sphingolipid metabolism                                | ko00600 | 4 | 111 | 715 | 13897 | c116191. graph_c0;c125626. graph_c0;c132695. graph_c0;c133691. graph_c1 | K00654+K07407+K00654+K04713 |
| Ether lipid metabolism                                 | ko00565 | 4 | 87  | 715 | 13897 | c111700. graph_c0;c128997. graph_c0;c130583. graph_c1;c133450. graph_c0 | K01115+K01115+K01115+K01115 |
| Histidine metabolism                                   | ko00340 | 4 | 81  | 715 | 13897 | c122868. graph_c0;c128735. graph_c0;c130417. graph_c0;c130417. graph_c1 | K00128+K00128+K00128+K00128 |
| Riboflavin metabolism                                  | ko00740 | 4 | 26  | 715 | 13897 | c112285. graph_c0;c112874. graph_c0;c125704. graph_c0;c129304. graph_c0 | K14652+K14652+K14379+K14652 |
| Tropane, piperidine and pyridine alkaloid biosynthesis | ko00960 | 4 | 67  | 715 | 13897 | c118423. graph_c0;c122496. graph_c0;c125213. graph_c1;c132013. graph_c0 | K00276+K08081+K08081+K00815 |
| Propanoate metabolism                                  | ko00640 | 4 | 140 | 715 | 13897 | c118938. graph_c0;c132202. graph_c0;c134376. graph_c0;c90012. graph_c0  | K05605+K02160+K01963+K01962 |
| SNARE interactions in vesicular transport              | ko04130 | 4 | 99  | 715 | 13897 | c113095. graph_c0;c116715. graph_c0;c122899. graph_c0;c132440. graph_c0 | K08506+K08486+K08506+K08492 |
| Base excision repair                                   | ko03410 | 4 | 137 | 715 | 13897 | c110971. graph_c0;c129051. graph_c0;c133355. graph_c0;c97798. graph_c0  | K10798+K02325+K10747+K10798 |
| Regulation of autophagy                                | ko04140 | 3 | 134 | 715 | 13897 | c120184. graph_c0;c125459. graph_c0;c128260. graph_c0                   | K07198+K07198+K07198        |
| Arachidonic                                            | ko00590 | 3 | 51  | 715 | 13897 | c108187. graph_c0;c118215. graph_c0;c127844.                            | K00432+K00079+K18592        |

|                                               |         |   |     |     |       |                                                       |                      |
|-----------------------------------------------|---------|---|-----|-----|-------|-------------------------------------------------------|----------------------|
| acid metabolism                               |         |   |     |     |       | graph_c0                                              |                      |
| Monoterpenoid biosynthesis                    | ko00902 | 3 | 6   | 715 | 13897 | c102174. graph_c0;c119420. graph_c0;c122797. graph_c0 | K15086+K15095+K15086 |
| Aminoacyl-tRNA biosynthesis                   | ko00970 | 3 | 289 | 715 | 13897 | c129854. graph_c0;c131414. graph_c0;c78250. graph_c0  | K14164+K01866+K01893 |
| Sesquiterpenoid and triterpenoid biosynthesis | ko00909 | 3 | 22  | 715 | 13897 | c122391. graph_c0;c124467. graph_c0;c127277. graph_c0 | K15813+K15803+K00511 |
| Basal transcription factors                   | ko03022 | 3 | 135 | 715 | 13897 | c114404. graph_c0;c124056. graph_c0;c133777. graph_c0 | K03139+K03120+K03131 |
| Lysine biosynthesis                           | ko00300 | 3 | 42  | 715 | 13897 | c114056. graph_c0;c123498. graph_c0;c70627. graph_c0  | K10206+K00215+K01778 |
| Limonene and pinene degradation               | ko00903 | 3 | 28  | 715 | 13897 | c122868. graph_c0;c130417. graph_c0;c130417. graph_c1 | K00128+K00128+K00128 |
| Pantothenate and CoA biosynthesis             | ko00770 | 3 | 80  | 715 | 13897 | c114123. graph_c0;c123819. graph_c0;c129360. graph_c0 | K02201+K00826+K01918 |
| Valine, leucine and isoleucine biosynthesis   | ko00290 | 3 | 58  | 715 | 13897 | c122143. graph_c0;c123819. graph_c0;c93628. graph_c0  | K00052+K00826+K01704 |
| C5-Branched dibasic acid metabolism           | ko00660 | 2 | 28  | 715 | 13897 | c122143. graph_c0;c93628. graph_c0                    | K00052+K01704        |

|                                                        |         |   |     |     |       |                                   |               |
|--------------------------------------------------------|---------|---|-----|-----|-------|-----------------------------------|---------------|
| Glycosylphosphatidylinositol (GPI)-anchor biosynthesis | ko00563 | 2 | 58  | 715 | 13897 | c105535.graph_c0;c118365.graph_c0 | K11001+K07541 |
| Flavone and flavonol biosynthesis                      | ko00944 | 2 | 6   | 715 | 13897 | c128275.graph_c0;c92897.graph_c0  | K05280+K13272 |
| Protein export                                         | ko03060 | 2 | 165 | 715 | 13897 | c106546.graph_c0;c129331.graph_c0 | K07342+K12948 |
| Degradation of aromatic compounds                      | ko01220 | 2 | 27  | 715 | 13897 | c108564.graph_c0;c126578.graph_c0 | K00001+K00121 |
| Synthesis and degradation of ketone bodies             | ko00072 | 2 | 27  | 715 | 13897 | c112284.graph_c0;c122610.graph_c0 | K01641+K01640 |
| Butanoate metabolism                                   | ko00650 | 2 | 85  | 715 | 13897 | c112284.graph_c0;c122610.graph_c0 | K01641+K01640 |
| Diterpenoid biosynthesis                               | ko00904 | 2 | 25  | 715 | 13897 | c113336.graph_c0;c130968.graph_c0 | K04125+K04121 |
| Stilbenoid, diarylheptanoid and gingerol biosynthesis  | ko00945 | 2 | 34  | 715 | 13897 | c111410.graph_c0;c116105.graph_c0 | K13065+K13065 |
| Taurine and hypotaurine metabolism                     | ko00430 | 2 | 26  | 715 | 13897 | c121597.graph_c0;c127844.graph_c0 | K10712+K18592 |



|                                                      |         |   |     |     |       |                  |        |
|------------------------------------------------------|---------|---|-----|-----|-------|------------------|--------|
| Vitamin B6<br>metabolism                             | ko00750 | 1 | 38  | 715 | 13897 | c90381.graph_c0  | K13248 |
| Glycosphingolip<br>id biosynthesis<br>- globo series | ko00603 | 1 | 21  | 715 | 13897 | c125626.graph_c0 | K07407 |
| Other types of<br>O-glycan<br>biosynthesis           | ko00514 | 1 | 18  | 715 | 13897 | c88959.graph_c0  | K09667 |
| Selenocompound<br>metabolism                         | ko00450 | 1 | 89  | 715 | 13897 | c120855.graph_c0 | K01761 |
| N-Glycan<br>biosynthesis                             | ko00510 | 1 | 156 | 715 | 13897 | c117730.graph_c0 | K00737 |
| Nicotinate and<br>nicotinamide<br>metabolism         | ko00760 | 1 | 43  | 715 | 13897 | c121893.graph_c0 | K01081 |
| Anthocyanin<br>biosynthesis                          | ko00942 | 1 | 4   | 715 | 13897 | c117163.graph_c0 | K12338 |
| Non-homologous<br>end-joining                        | ko03450 | 1 | 24  | 715 | 13897 | c109375.graph_c0 | K10884 |
| Vancomycin<br>resistance                             | ko01502 | 1 | 2   | 715 | 13897 | c108176.graph_c0 | K02563 |

Table S3. Putative unigenes related to flower pigmentation.

| Pathway                      | Gene        | Enzyme                              | Unigene number |
|------------------------------|-------------|-------------------------------------|----------------|
| phenylpropanoid biosynthesis | <i>PAL</i>  | Phenylalanine ammonia-lyase         | 44             |
|                              | <i>CHS</i>  | Chalcone synthase                   | 6              |
|                              | <i>CHI</i>  | Chalcone isomerase                  | 5              |
|                              | <i>F3H</i>  | Flavanone 3-hydroxylase             | 2              |
| Flavonoid biosynthesis       | <i>F3'H</i> | Flavanone 3'-hydroxylase            | 5              |
|                              | <i>FLS</i>  | Flavonol synthase                   | 2              |
|                              | <i>DFR</i>  | Dihydroflavonol-4-reductase         | 3              |
|                              | <i>ANS</i>  | Anthocyanidin synthase              | 4              |
|                              | <i>AOMT</i> | Anthocyanin O-methyltransferase     | 4              |
| Anthocyanin biosynthesis     | <i>3GT</i>  | Anthocyanin 3-O-glycosyltransferase | 3              |
|                              | <i>5GT</i>  | Anthocyanin 5-O-glycosyltransferase | 1              |

Table S4. Putative unigenes related to transcriptional regulation and transferase activity.

| Function                   | Gene        | Enzyme                    | Unigene number |
|----------------------------|-------------|---------------------------|----------------|
| Transcriptional regulation | <i>MYB</i>  | MYB transcription factor  | 88             |
|                            | <i>bHLH</i> | bHLH transcription factor | 16             |
|                            | <i>WD</i>   | WD-repeat protein         | 44             |
| Transferase activity       | <i>GST</i>  | Glutathione S-transferase | 64             |

Table S5. KEGG pathway classification of DEGs in PO vs PR comparison.

| #Pathway                          | ko_ID   | Unigene | gene  | Unigene_all | gene_all |                                                                                                                                                                                                                                                                                                                                                                                                                                                                                                                                                                                                                                                                                                                                                                                                                                                                                                                                                                                                                                                                                                                                                                           |
|-----------------------------------|---------|---------|-------|-------------|----------|---------------------------------------------------------------------------------------------------------------------------------------------------------------------------------------------------------------------------------------------------------------------------------------------------------------------------------------------------------------------------------------------------------------------------------------------------------------------------------------------------------------------------------------------------------------------------------------------------------------------------------------------------------------------------------------------------------------------------------------------------------------------------------------------------------------------------------------------------------------------------------------------------------------------------------------------------------------------------------------------------------------------------------------------------------------------------------------------------------------------------------------------------------------------------|
| #KEGG_n                           | 477     | KEGG_N  | 13897 |             |          |                                                                                                                                                                                                                                                                                                                                                                                                                                                                                                                                                                                                                                                                                                                                                                                                                                                                                                                                                                                                                                                                                                                                                                           |
| Starch and sucrose metabolism     | ko00500 | 36      | 469   | 477         | 13897    | c105513. graph_c1;c106004. graph_c0;c108042. graph_c0;c108790. graph_c0;c109671. graph_c0;c115711. graph_c0;c117587. graph_c0;c117822. graph_c0;c118113. graph_c0;c118816. graph_c0;c119141. graph_c0;c119325. graph_c0;c120576. graph_c0;c121742. graph_c0;c122721. graph_c0;c123210. graph_c0;c123220. graph_c0;c125155. graph_c1;c126580. graph_c0;c126811. graph_c0;c126934. graph_c0;c127107. graph_c0;c127792. graph_c0;c129616. graph_c0;c129750. graph_c0;c130158. graph_c0;c130187. graph_c0;c130727. graph_c1;c131002. graph_c1;c131646. graph_c1;c131799. graph_c0;c23686. graph_c0;c71123. graph_c0;c86535. graph_c0;c88845. graph_c0;c97687. graph_c0;c100991. graph_c0;c105815. graph_c0;c106087. graph_c0;c107593. graph_c0;c108427. graph_c0;c109272. graph_c0;c109646. graph_c0;c112138. graph_c0;c112179. graph_c0;c113017. graph_c0;c116573. graph_c0;c116665. graph_c0;c116968. graph_c0;c118188+K01188+K18447+K01188+K05350+K01176+K00695+K01051+K01188+K01188+K00696+K01184+K01051+K01051+K01835+K05350+K01188+K01176+K01177+K01193+K01187+K00847+K01188+K01051+K01051+K01087+K00847+K01176+K00696+K00688+K01176+K01177+K01051+K01188+K05350+K01188 |
| Plant hormone signal transduction | ko04075 | 33      | 403   | 477         | 13897    | K14487+K14505+K14490+K14492+K14490+K14492+K14488+K13464+K14488+K14484+K14505+K14488+K14432+K14487+K14488+K14496+K14488+K14488+K14497+K14498+K13464+K14484+K14505+K14490+K14512+K14491+K14491+K14488+K14488+K14505+                                                                                                                                                                                                                                                                                                                                                                                                                                                                                                                                                                                                                                                                                                                                                                                                                                                                                                                                                        |

|                              |         |    |     |     |       |                                                                                                                                                                                                                                                                                                                                                                                                                                                                                                                                                                                                                                                                                                                                                                                                                                                                                                                  |                                                                                                                                                                                                            |
|------------------------------|---------|----|-----|-----|-------|------------------------------------------------------------------------------------------------------------------------------------------------------------------------------------------------------------------------------------------------------------------------------------------------------------------------------------------------------------------------------------------------------------------------------------------------------------------------------------------------------------------------------------------------------------------------------------------------------------------------------------------------------------------------------------------------------------------------------------------------------------------------------------------------------------------------------------------------------------------------------------------------------------------|------------------------------------------------------------------------------------------------------------------------------------------------------------------------------------------------------------|
|                              |         |    |     |     |       | h_c0;c117784. graph_c0;c120105. graph_c0;c120345. graph_c0;c120847. graph_c0;c121149. graph_c0;c121691. graph_c0;c121767. graph_c0;c122051. graph_c0;c122394. graph_c0;c123048. graph_c0;c124750. graph_c1;c124826. graph_c0;c125541. graph_c0;c127036. graph_c1;c127324. graph_c0;c127580. graph_c0;c127695. graph_c0;c130168. graph_c0;c132781. graph_c0;c133064. graph_c0;c101742. graph_c0;c105513. graph_c1;c106004. graph_c0;c107475. graph_c0;c108790. graph_c0;c109671. graph_c0;c111428. graph_c0;c111764. graph_c0;c114770. graph_c0;c116628. graph_c0;c117640. graph_c0;c118113. graph_c0;c118247. graph_c0;c118816. graph_c0;c120064. graph_c0;c120064. graph_c1;c123210. graph_c0;c123220. graph_c0;c125412. graph_c0;c127792. graph_c0;c129902. graph_c0;c130735. graph_c0;c133930. graph_c0;c50245. graph_c0;c86535. graph_c0;c86972. graph_c0;c88845. graph_c0;c89173. graph_c0;c97687. graph_c0 | K14509+K14492+K14491                                                                                                                                                                                       |
| Phenylpropanoid biosynthesis | ko00940 | 29 | 250 | 477 | 13897 | h_c0;c118816. graph_c0;c120064. graph_c0;c120064. graph_c1;c123210. graph_c0;c123220. graph_c0;c125412. graph_c0;c127792. graph_c0;c129902. graph_c0;c130735. graph_c0;c133930. graph_c0;c50245. graph_c0;c86535. graph_c0;c86972. graph_c0;c88845. graph_c0;c89173. graph_c0;c97687. graph_c0                                                                                                                                                                                                                                                                                                                                                                                                                                                                                                                                                                                                                   | K00083+K01188+K01188+K00430+K01188+K05350+K00430+K11188+K13066+K00430+K12356+K01188+K00430+K01188+K13066+K13066+K05350+K01188+K01904+K01188+K13066+K00430+K00430+K00083+K01188+K11188+K05350+K09755+K01188 |
| Ribosome                     | ko03010 | 24 | 996 | 477 | 13897 | c102478. graph_c0;c102533. graph_c0;c105246. graph_c0;c108452. graph_c1;c111                                                                                                                                                                                                                                                                                                                                                                                                                                                                                                                                                                                                                                                                                                                                                                                                                                     | K02939+K02937+K02940+K02922+K02866+K02922+K02988+K02880+K02959+K02896+                                                                                                                                     |

|                   |         |    |     |     |       |                                           |                                     |
|-------------------|---------|----|-----|-----|-------|-------------------------------------------|-------------------------------------|
|                   |         |    |     |     |       | 222. graph_c0; c114175. graph_c0; c11808  | K02937+K02896+K02993+K02938+K02882+ |
|                   |         |    |     |     |       | 5. graph_c0; c119933. graph_c0; c122506.  | K02980+K02992+K02937+K02882+K02868+ |
|                   |         |    |     |     |       | graph_c0; c124830. graph_c0; c125171. gr  | K02960+K02938+K02949+K02894         |
|                   |         |    |     |     |       | aph_c0; c125852. graph_c0; c125958. grap  |                                     |
|                   |         |    |     |     |       | h_c0; c129136. graph_c0; c130486. graph_  |                                     |
|                   |         |    |     |     |       | c0; c132355. graph_c0; c132848. graph_c0  |                                     |
|                   |         |    |     |     |       | ; c133030. graph_c0; c133694. graph_c0; c |                                     |
|                   |         |    |     |     |       | 133984. graph_c0; c134599. graph_c0; c49  |                                     |
|                   |         |    |     |     |       | 761. graph_c0; c90571. graph_c0; c95596.  |                                     |
|                   |         |    |     |     |       | graph_c0                                  |                                     |
|                   |         |    |     |     |       | c101979. graph_c0; c102878. graph_c0; c1  |                                     |
|                   |         |    |     |     |       | 14056. graph_c0; c117589. graph_c0; c117  |                                     |
|                   |         |    |     |     |       | 781. graph_c1; c118697. graph_c0; c12109  |                                     |
|                   |         |    |     |     |       | 0. graph_c0; c121536. graph_c0; c122230.  | K05359+K15227+K10206+K00620+K06001+ |
|                   |         |    |     |     |       | graph_c0; c123819. graph_c0; c124334. gr  | K00611+K15227+K00815+K01695+K00826+ |
| Biosynthesis of   | ko01230 | 23 | 812 | 477 | 13897 | aph_c0; c124635. graph_c0; c124834. grap  | K01738+K01915+K00615+K13832+K01738+ |
| amino acids       |         |    |     |     |       | h_c0; c129927. graph_c0; c132024. graph_  | K13832+K00030+K00789+K00600+K15227+ |
|                   |         |    |     |     |       | c0; c133226. graph_c0; c49644. graph_c0;  | K13034+K01704+K00891                |
|                   |         |    |     |     |       | c51012. graph_c0; c51284. graph_c0; c716  |                                     |
|                   |         |    |     |     |       | 76. graph_c0; c88948. graph_c0; c93628. g |                                     |
|                   |         |    |     |     |       | raph_c0; c95528. graph_c0                 |                                     |
|                   |         |    |     |     |       | c100613. graph_c0; c102566. graph_c0; c1  | K00025+K00122+K00830+K05605+K01057+ |
|                   |         |    |     |     |       | 10315. graph_c0; c118938. graph_c0; c120  | K00855+K01738+K00615+K00121+K01610+ |
| Carbon metabolism | ko01200 | 22 | 955 | 477 | 13897 | 124. graph_c0; c123772. graph_c0; c12433  | K01595+K00026+K01738+K01963+K01610+ |
|                   |         |    |     |     |       | 4. graph_c0; c124834. graph_c0; c126578.  | K00030+K00600+K01895+K00627+K01679+ |
|                   |         |    |     |     |       | graph_c0; c128281. graph_c0; c128366. gr  | K13034+K01962                       |



|                                 |         |    |     |     |       |                                                                                                                                                                                                                                                                                                                                                                                                                                                                                                                                                                                                                                                                                                                                                                                                                                                                                                                                                                                                                                                           |                                                                                                                                      |
|---------------------------------|---------|----|-----|-----|-------|-----------------------------------------------------------------------------------------------------------------------------------------------------------------------------------------------------------------------------------------------------------------------------------------------------------------------------------------------------------------------------------------------------------------------------------------------------------------------------------------------------------------------------------------------------------------------------------------------------------------------------------------------------------------------------------------------------------------------------------------------------------------------------------------------------------------------------------------------------------------------------------------------------------------------------------------------------------------------------------------------------------------------------------------------------------|--------------------------------------------------------------------------------------------------------------------------------------|
| Plant-pathogen interaction      | ko04626 | 19 | 373 | 477 | 13897 | c112144. graph_c0; c112507. graph_c0; c115120. graph_c0; c119307. graph_c0; c119888. graph_c0; c121838. graph_c0; c122045. graph_c0; c125898. graph_c1; c129591. graph_c0; c130786. graph_c0; c131652. graph_c1; c132441. graph_c0; c132982. graph_c1; c133136. graph_c0; c134348. graph_c0; c134380. graph_c0; c50350. graph_c0; c88346. graph_c0; c91463. graph_c0; c102004. graph_c0; c102687. graph_c0; c109303. graph_c0; c109581. graph_c0; c115772. graph_c0; c117008. graph_c0; c118104. graph_c0; c118459. graph_c0; c120300. graph_c0; c121567. graph_c0; c123502. graph_c0; c123665. graph_c0; c125727. graph_c0; c133558. graph_c0; c134411. graph_c0; c134639. graph_c0; c23669. graph_c0; c98181. graph_c0; c100128. graph_c0; c101644. graph_c0; c104922. graph_c0; c105700. graph_c0; c108958. graph_c0; c109514. graph_c0; c109836. graph_c0; c111404. graph_c0; c120141. graph_c0; c124921. graph_c0; c125492. graph_c0; c126976. graph_c0; c128494. graph_c0; c130722. graph_c0; c132793. graph_c0; c95982. graph_c0; c97392. graph_c0 | K02183+K13448+K13448+K13412+K13412+K13459+K18875+K13457+K05391+K13429+K13420+K13412+K13447+K13447+K13457+K13459+K13448+K13412+K12795 |
| alpha-Linolenic acid metabolism | ko00592 | 18 | 130 | 477 | 13897 | c100128. graph_c0; c101644. graph_c0; c104922. graph_c0; c105700. graph_c0; c108958. graph_c0; c109514. graph_c0; c109836. graph_c0; c111404. graph_c0; c120141. graph_c0; c124921. graph_c0; c125492. graph_c0; c126976. graph_c0; c128494. graph_c0; c130722. graph_c0; c132793. graph_c0; c95982. graph_c0; c97392. graph_c0                                                                                                                                                                                                                                                                                                                                                                                                                                                                                                                                                                                                                                                                                                                           | K18857+K00454+K08241+K18857+K01723+K10525+K18857+K01723+K05894+K01723+K00232+K10525+K08241+K00232+K00454+K00454+K00454+K01047        |
| Photosynthesis                  | ko00195 | 17 | 144 | 477 | 13897 | c100128. graph_c0; c101644. graph_c0; c104922. graph_c0; c105700. graph_c0; c108958. graph_c0; c109514. graph_c0; c109836. graph_c0; c111404. graph_c0; c120141. graph_c0; c124921. graph_c0; c125492. graph_c0; c126976. graph_c0; c128494. graph_c0; c130722. graph_c0; c132793. graph_c0; c95982. graph_c0; c97392. graph_c0                                                                                                                                                                                                                                                                                                                                                                                                                                                                                                                                                                                                                                                                                                                           | K02115+K02638+K02639+K08902+K02641+K02692+K02115+K14332+K02707+K02694+K02109+K02113+K02691+K02710+K02705+K02641+K02717               |





|                                    |         |    |     |     |       |                                                                                                                                                                                                                                                                                                                                                                                                                                                                                                                                                                                                                                                                                                                                                                                                                                                                                                                                      |                                                                                                                                                                                                                                                                                                                                                                                      |
|------------------------------------|---------|----|-----|-----|-------|--------------------------------------------------------------------------------------------------------------------------------------------------------------------------------------------------------------------------------------------------------------------------------------------------------------------------------------------------------------------------------------------------------------------------------------------------------------------------------------------------------------------------------------------------------------------------------------------------------------------------------------------------------------------------------------------------------------------------------------------------------------------------------------------------------------------------------------------------------------------------------------------------------------------------------------|--------------------------------------------------------------------------------------------------------------------------------------------------------------------------------------------------------------------------------------------------------------------------------------------------------------------------------------------------------------------------------------|
| Ubiquitin mediated proteolysis     | ko04120 | 14 | 468 | 477 | 13897 | aph_c0;c131042. graph_c0;c133930. graph_c0;c86972. graph_c0<br>c100543. graph_c0;c108531. graph_c0;c108920. graph_c0;c115011. graph_c0;c117552. graph_c0;c119129. graph_c0;c123174. graph_c0;c123347. graph_c0;c123525. graph_c0;c128987. graph_c0;c131884. graph_c0;c133559. graph_c0;c97655. graph_c0;c97880. graph_c0<br>c100613. graph_c0;c117302. graph_c0;c120405. graph_c1;c120855. graph_c0;c121536. graph_c0;c123728. graph_c0;c124334. graph_c0;c125674. graph_c0;c125789. graph_c0;c129490. graph_c0;c132024. graph_c0;c51012. graph_c0;c88948. graph_c0<br>c102004. graph_c0;c109581. graph_c0;c111937. graph_c0;c118104. graph_c0;c120405. graph_c1;c122721. graph_c0;c126578. graph_c0;c128281. graph_c0;c128735. graph_c0;c134543. graph_c0;c134605. graph_c0;c62501. graph_c0;c85077. graph_c0<br>c100613. graph_c0;c120405. graph_c1;c128281. graph_c0;c128366. graph_c0;c128735. graph_c0;c129490. graph_c0;c13437 | K10579+K03094+K10144+K10144+K03347+K10583+K03354+K03094+K03363+K10581+K12456+K10144+K03868+K06689<br>K00025+K00797+K00016+K01761+K00815+K01762+K01738+K00547+K05933+K00026+K01738+K00789+K13034<br>K18857+K18857+K01785+K18857+K00016+K01835+K00121+K01610+K00128+K01568+K01610+K01895+K00627<br>K00025+K00016+K01610+K01595+K00128+K00026+K01963+K01610+K01895+K00627+K01679+K01962 |
| Cysteine and methionine metabolism | ko00270 | 13 | 289 | 477 | 13897 |                                                                                                                                                                                                                                                                                                                                                                                                                                                                                                                                                                                                                                                                                                                                                                                                                                                                                                                                      |                                                                                                                                                                                                                                                                                                                                                                                      |
| Glycolysis / Gluconeogenesis       | ko00010 | 13 | 448 | 477 | 13897 |                                                                                                                                                                                                                                                                                                                                                                                                                                                                                                                                                                                                                                                                                                                                                                                                                                                                                                                                      |                                                                                                                                                                                                                                                                                                                                                                                      |
| Pyruvate metabolism                | ko00620 | 12 | 357 | 477 | 13897 |                                                                                                                                                                                                                                                                                                                                                                                                                                                                                                                                                                                                                                                                                                                                                                                                                                                                                                                                      |                                                                                                                                                                                                                                                                                                                                                                                      |

|                                          |         |    |     |     |       |                                                                                                                                                                                                                                                                                                                                                                                                                                                                                                                                                                                                                                                                                                                                                                                                                                                                                                                                            |                                                                                                                                                                         |
|------------------------------------------|---------|----|-----|-----|-------|--------------------------------------------------------------------------------------------------------------------------------------------------------------------------------------------------------------------------------------------------------------------------------------------------------------------------------------------------------------------------------------------------------------------------------------------------------------------------------------------------------------------------------------------------------------------------------------------------------------------------------------------------------------------------------------------------------------------------------------------------------------------------------------------------------------------------------------------------------------------------------------------------------------------------------------------|-------------------------------------------------------------------------------------------------------------------------------------------------------------------------|
| Tyrosine metabolism                      | ko00350 | 12 | 121 | 477 | 13897 | 6. graph_c0;c134605. graph_c0;c62501. graph_c0;c85077. graph_c0;c88872. graph_c0;c90012. graph_c0<br>c102004. graph_c0;c109581. graph_c0;c110715. graph_c0;c118104. graph_c0;c118423. graph_c0;c119172. graph_c0;c121536. graph_c0;c126578. graph_c0;c130866. graph_c0;c131042. graph_c0;c23725. graph_c0;c23725. graph_c1<br>c108935. graph_c0;c111700. graph_c0;c112162. graph_c0;c114229. graph_c0;c118376. graph_c0;c127088. graph_c0;c131641. graph_c0;c131641. graph_c1;c131854. graph_c1;c133450. graph_c0;c23697. graph_c0<br>c124424. graph_c0;c124583. graph_c0;c127594. graph_c0;c128040. graph_c0;c131711. graph_c0;c132698. graph_c0;c133529. graph_c0;c86343. graph_c0;c88162. graph_c0;c97209. graph_c0;c99637. graph_c1<br>c117822. graph_c0;c119325. graph_c0;c120576. graph_c0;c121742. graph_c0;c122856. graph_c0;c124896. graph_c0;c128735. graph_c0;c129616. graph_c0;c129750. graph_c0;c23628. graph_c0;c71123. grap | K18857+K18857+K07253+K18857+K00276+K00457+K00815+K00121+K01592+K00276+K01592+K01592<br><br>K07904+K01115+K07904+K12489+K01115+K00889+K12489+K12489+K03283+K01115+K03283 |
| Endocytosis                              | ko04144 | 11 | 472 | 477 | 13897 |                                                                                                                                                                                                                                                                                                                                                                                                                                                                                                                                                                                                                                                                                                                                                                                                                                                                                                                                            |                                                                                                                                                                         |
| Cutin, suberine and wax biosynthesis     | ko00073 | 11 | 60  | 477 | 13897 |                                                                                                                                                                                                                                                                                                                                                                                                                                                                                                                                                                                                                                                                                                                                                                                                                                                                                                                                            | K15404+K15398+K17991+K13356+K15404+K15398+K13407+K15398+K13356+K13356+K13356                                                                                            |
| Pentose and glucuronate interconversions | ko00040 | 11 | 202 | 477 | 13897 |                                                                                                                                                                                                                                                                                                                                                                                                                                                                                                                                                                                                                                                                                                                                                                                                                                                                                                                                            | K01051+K01184+K01051+K01051+K00011+K01728+K00128+K01051+K01051+K01728+K01051                                                                                            |

|                                                     |         |    |     |     |       |                                                                                                                                                                                                                                                                                                                                                                                                                                                                                                                                                                                                                                                                                                                                                                                                                                                                                                                                                |                                                                                                                                                                                                                                                                                                                                                                           |
|-----------------------------------------------------|---------|----|-----|-----|-------|------------------------------------------------------------------------------------------------------------------------------------------------------------------------------------------------------------------------------------------------------------------------------------------------------------------------------------------------------------------------------------------------------------------------------------------------------------------------------------------------------------------------------------------------------------------------------------------------------------------------------------------------------------------------------------------------------------------------------------------------------------------------------------------------------------------------------------------------------------------------------------------------------------------------------------------------|---------------------------------------------------------------------------------------------------------------------------------------------------------------------------------------------------------------------------------------------------------------------------------------------------------------------------------------------------------------------------|
| RNA degradation                                     | ko03018 | 10 | 419 | 477 | 13897 | h_c0<br>c109491. graph_c0;c116941. graph_c0;c120290. graph_c0;c125901. graph_c0;c126315. graph_c0;c130826. graph_c0;c131538. graph_c1;c134322. graph_c0;c134441. graph_c0;c93753. graph_c0<br>c111454. graph_c0;c113927. graph_c0;c121595. graph_c0;c121595. graph_c1;c122587. graph_c0;c124462. graph_c0;c125410. graph_c0;c127762. graph_c1;c81933. graph_c0;c88832. graph_c0<br>c101979. graph_c0;c102878. graph_c0;c117781. graph_c1;c121090. graph_c0;c121536. graph_c0;c122230. graph_c0;c129927. graph_c0;c133226. graph_c0;c71676. graph_c0;c95528. graph_c0<br>c106554. graph_c0;c122721. graph_c0;c123063. graph_c0;c124607. graph_c0;c127107. graph_c0;c130187. graph_c0;c131811. graph_c0;c54775. graph_c0;c88590. graph_c0;c89832. graph_c0<br>c100226. graph_c0;c108824. graph_c0;c115084. graph_c0;c121978. graph_c0;c123502. graph_c0;c124335. graph_c0;c132570. graph_c0;c133558. graph_c0;c134376. graph_c0;c90012. graph_c0 | K04077+K12606+K12608+K04077+K13126+K12603+K12619+K14442+K12619+K14442<br>K13789+K05356+K01662+K01662+K15889+K13789+K10960+K11778+K00021+K00021<br>K05359+K15227+K06001+K15227+K00815+K01695+K13832+K13832+K15227+K00891<br>K01183+K01835+K01183+K01209+K00847+K00847+K01183+K01784+K01784+K12449<br>K09458+K01074+K10251+K10257+K00232+K10781+K00059+K00232+K01963+K01962 |
| Terpenoid backbone biosynthesis                     | ko00900 | 10 | 155 | 477 | 13897 |                                                                                                                                                                                                                                                                                                                                                                                                                                                                                                                                                                                                                                                                                                                                                                                                                                                                                                                                                |                                                                                                                                                                                                                                                                                                                                                                           |
| Phenylalanine, tyrosine and tryptophan biosynthesis | ko00400 | 10 | 117 | 477 | 13897 |                                                                                                                                                                                                                                                                                                                                                                                                                                                                                                                                                                                                                                                                                                                                                                                                                                                                                                                                                |                                                                                                                                                                                                                                                                                                                                                                           |
| Amino sugar and nucleotide sugar metabolism         | ko00520 | 10 | 335 | 477 | 13897 |                                                                                                                                                                                                                                                                                                                                                                                                                                                                                                                                                                                                                                                                                                                                                                                                                                                                                                                                                |                                                                                                                                                                                                                                                                                                                                                                           |
| Fatty acid metabolism                               | ko01212 | 10 | 268 | 477 | 13897 |                                                                                                                                                                                                                                                                                                                                                                                                                                                                                                                                                                                                                                                                                                                                                                                                                                                                                                                                                |                                                                                                                                                                                                                                                                                                                                                                           |

|                                |         |    |     |     |       |                                                                                                                                                                                   |                                                                       |
|--------------------------------|---------|----|-----|-----|-------|-----------------------------------------------------------------------------------------------------------------------------------------------------------------------------------|-----------------------------------------------------------------------|
| Pyrimidine metabolism          | ko00240 | 10 | 456 | 477 | 13897 | c102867. graph_c0;c110950. graph_c0;c114780. graph_c0;c124206. graph_c0;c125604. graph_c0;c128678. graph_c0;c129051. graph_c0;c131878. graph_c0;c64367. graph_c0;c93528. graph_c0 | K00857+K10808+K00876+K03014+K03040+K10807+K02325+K10808+K02326+K01520 |
| Glycerophospholipid metabolism | ko00564 | 9  | 243 | 477 | 13897 | c105872. graph_c0;c111700. graph_c0;c118376. graph_c0;c124631. graph_c0;c127052. graph_c0;c128220. graph_c0;c130294. graph_c0;c133450. graph_c0;c98181. graph_c0                  | K06130+K01115+K01115+K06129+K13508+K13513+K13508+K01115+K01047        |
| Galactose metabolism           | ko00052 | 9  | 166 | 477 | 13897 | c111937. graph_c0;c121255. graph_c1;c122721. graph_c0;c122856. graph_c0;c126811. graph_c0;c126934. graph_c0;c127648. graph_c0;c54775. graph_c0;c88590. graph_c0                   | K01785+K06617+K01835+K00011+K01193+K01187+K18819+K01784+K01784        |
| Peroxisome                     | ko04146 | 9  | 287 | 477 | 13897 | c110315. graph_c0;c123153. graph_c0;c123502. graph_c0;c128040. graph_c0;c129908. graph_c0;c133558. graph_c0;c88162. graph_c0;c97209. graph_c0;c99637. graph_c1                    | K00830+K13346+K00232+K13356+K11517+K00232+K13356+K13356+K13356        |
| RNA transport                  | ko03013 | 8  | 630 | 477 | 13897 | c102019. graph_c0;c116762. graph_c0;c117960. graph_c0;c120059. graph_c0;c125991. graph_c0;c126315. graph_c0;c130438. graph_c0;c131752. graph_c0                                   | K12882+K03257+K03260+K03237+K03231+K13126+K14293+K03250               |
| Thiamine metabolism            | ko00730 | 8  | 45  | 477 | 13897 | c112666. graph_c0;c117167. graph_c0;c117973. graph_c0;c121244. graph_c0;c121                                                                                                      | K03146+K04487+K06928+K03146+K01662+K01662+K04487+K00878               |

|                                         |         |   |     |     |       |                                                                                                                                                                                                                                                                                                                                                                                                                                                                                                                                                                                                                                                                                                                                                                                                                                                                                                                                                                                                           |                                                                                                                                                                                                                                                                                                                                                     |
|-----------------------------------------|---------|---|-----|-----|-------|-----------------------------------------------------------------------------------------------------------------------------------------------------------------------------------------------------------------------------------------------------------------------------------------------------------------------------------------------------------------------------------------------------------------------------------------------------------------------------------------------------------------------------------------------------------------------------------------------------------------------------------------------------------------------------------------------------------------------------------------------------------------------------------------------------------------------------------------------------------------------------------------------------------------------------------------------------------------------------------------------------------|-----------------------------------------------------------------------------------------------------------------------------------------------------------------------------------------------------------------------------------------------------------------------------------------------------------------------------------------------------|
| Glyoxylate and dicarboxylate metabolism | ko00630 | 8 | 252 | 477 | 13897 | 595. graph_c0; c121595. graph_c1; c12721<br>4. graph_c1; c127921. graph_c0<br>c100613. graph_c0; c102566. graph_c0; c1<br>10315. graph_c0; c124635. graph_c0; c129<br>490. graph_c0; c129908. graph_c0; c51284<br>. graph_c0; c96010. graph_c0<br>c105010. graph_c0; c113632. graph_c0; c1<br>21921. graph_c0; c123483. graph_c0; c132<br>440. graph_c0; c70889. graph_c0; c97672.<br>graph_c0<br>c102019. graph_c0; c118482. graph_c0; c1<br>24542. graph_c0; c126315. graph_c0; c129<br>634. graph_c0; c132292. graph_c2; c88662<br>. graph_c0<br>c108042. graph_c0; c114913. graph_c0; c1<br>18742. graph_c0; c122856. graph_c0; c127<br>107. graph_c0; c130187. graph_c0; c13097<br>8. graph_c0<br>c124810. graph_c0; c125250. graph_c0; c1<br>29356. graph_c0; c130317. graph_c0; c130<br>652. graph_c1; c131511. graph_c0; c13202<br>5. graph_c0<br>c102004. graph_c0; c109581. graph_c0; c1<br>18104. graph_c0; c123502. graph_c0; c126<br>578. graph_c0; c128735. graph_c0; c13355<br>8. graph_c0 | K00025+K00122+K00830+K01915+K00026+<br>K11517+K00600+K02437<br>K02152+K07375+K02150+K04392+K08492+<br>K07374+K07375<br>K12882+K03456+K14400+K13126+K03265+<br>K03456+K03265<br>K18447+K00895+K00895+K00011+K00847+<br>K00847+K00895<br>K00279+K10760+K13495+K00279+K10717+<br>K00791+K00279<br>K18857+K18857+K18857+K00232+K00121+<br>K00128+K00232 |
| Phagosome                               | ko04145 | 7 | 348 | 477 | 13897 |                                                                                                                                                                                                                                                                                                                                                                                                                                                                                                                                                                                                                                                                                                                                                                                                                                                                                                                                                                                                           |                                                                                                                                                                                                                                                                                                                                                     |
| mRNA surveillance pathway               | ko03015 | 7 | 452 | 477 | 13897 |                                                                                                                                                                                                                                                                                                                                                                                                                                                                                                                                                                                                                                                                                                                                                                                                                                                                                                                                                                                                           |                                                                                                                                                                                                                                                                                                                                                     |
| Fructose and mannose metabolism         | ko00051 | 7 | 201 | 477 | 13897 |                                                                                                                                                                                                                                                                                                                                                                                                                                                                                                                                                                                                                                                                                                                                                                                                                                                                                                                                                                                                           |                                                                                                                                                                                                                                                                                                                                                     |
| Zeatin biosynthesis                     | ko00908 | 7 | 19  | 477 | 13897 |                                                                                                                                                                                                                                                                                                                                                                                                                                                                                                                                                                                                                                                                                                                                                                                                                                                                                                                                                                                                           |                                                                                                                                                                                                                                                                                                                                                     |
| Fatty acid degradation                  | ko00071 | 7 | 197 | 477 | 13897 |                                                                                                                                                                                                                                                                                                                                                                                                                                                                                                                                                                                                                                                                                                                                                                                                                                                                                                                                                                                                           |                                                                                                                                                                                                                                                                                                                                                     |

|                                                   |         |   |     |     |       |                                                                                                                                    |                                                      |
|---------------------------------------------------|---------|---|-----|-----|-------|------------------------------------------------------------------------------------------------------------------------------------|------------------------------------------------------|
| Glycine, serine<br>and threonine<br>metabolism    | ko00260 | 7 | 226 | 477 | 13897 | c110315.graph_c0;c117781.graph_c1;c1<br>18423.graph_c0;c122230.graph_c0;c131<br>042.graph_c0;c51284.graph_c0;c96010.<br>graph_c0   | K00830+K06001+K00276+K01695+K00276+<br>K00600+K02437 |
| Citrate cycle (TCA<br>cycle)                      | ko00020 | 7 | 304 | 477 | 13897 | c100613.graph_c0;c128281.graph_c0;c1<br>29490.graph_c0;c134605.graph_c0;c496<br>44.graph_c0;c85077.graph_c0;c88872.g<br>raph_c0    | K00025+K01610+K00026+K01610+K00030+<br>K00627+K01679 |
| Carbon fixation in<br>photosynthetic<br>organisms | ko00710 | 7 | 282 | 477 | 13897 | c100613.graph_c0;c123772.graph_c0;c1<br>24834.graph_c0;c128281.graph_c0;c128<br>366.graph_c0;c129490.graph_c0;c13460<br>5.graph_c0 | K00025+K00855+K00615+K01610+K01595+<br>K00026+K01610 |
| Isoquinoline<br>alkaloid<br>biosynthesis          | ko00950 | 6 | 54  | 477 | 13897 | c118423.graph_c0;c121536.graph_c0;c1<br>30866.graph_c0;c131042.graph_c0;c237<br>25.graph_c0;c23725.graph_c1                        | K00276+K00815+K01592+K00276+K01592+<br>K01592        |
| Porphyrin and<br>chlorophyll<br>metabolism        | ko00860 | 6 | 131 | 477 | 13897 | c121882.graph_c0;c123884.graph_c0;c1<br>25410.graph_c0;c127890.graph_c0;c127<br>890.graph_c1;c130025.graph_c0                      | K04035+K00218+K10960+K03403+K03403+<br>K13071        |
| ABC transporters                                  | ko02010 | 6 | 155 | 477 | 13897 | c119157.graph_c0;c126614.graph_c0;c1<br>30859.graph_c0;c131196.graph_c0;c132<br>418.graph_c0;c134352.graph_c0                      | K05658+K05658+K05658+K05658+K05658+<br>K05658        |
| Base excision<br>repair                           | ko03410 | 6 | 137 | 477 | 13897 | c110971.graph_c0;c121800.graph_c0;c1<br>24043.graph_c0;c129051.graph_c0;c643<br>67.graph_c0;c97798.graph_c0                        | K10798+K01142+K10798+K02325+K02326+<br>K10798        |
| Arginine and<br>proline metabolism                | ko00330 | 6 | 287 | 477 | 13897 | c117302.graph_c0;c117589.graph_c0;c1<br>18697.graph_c0;c124635.graph_c0;c128                                                       | K00797+K00620+K00611+K01915+K00128+<br>K01427        |

|                                               |         |   |     |     |       |                                                                                                                                                            |                                               |
|-----------------------------------------------|---------|---|-----|-----|-------|------------------------------------------------------------------------------------------------------------------------------------------------------------|-----------------------------------------------|
| Photosynthesis -<br>antenna proteins          | ko00196 | 6 | 52  | 477 | 13897 | 735. graph_c0; c130274. graph_c0<br>c100527. graph_c0; c106848. graph_c0; c1<br>09381. graph_c0; c114287. graph_c0; c716<br>81. graph_c0; c89965. graph_c0 | K08910+K08909+K08916+K08908+K08913+<br>K08913 |
| Circadian rhythm -<br>plant                   | ko04712 | 6 | 88  | 477 | 13897 | c112186. graph_c0; c126452. graph_c1; c1<br>27832. graph_c0; c130328. graph_c0; c132<br>912. graph_c0; c93168. graph_c0                                    | K16166+K12130+K16241+K12129+K12129+<br>K00660 |
| Spliceosome                                   | ko03040 | 6 | 868 | 477 | 13897 | c102019. graph_c0; c120047. graph_c0; c1<br>31854. graph_c1; c23697. graph_c0; c7135<br>7. graph_c0; c91908. graph_c0                                      | K12882+K12830+K03283+K03283+K12833+<br>K12833 |
| Brassinosteroid<br>biosynthesis               | ko00905 | 5 | 20  | 477 | 13897 | c105790. graph_c0; c118316. graph_c0; c1<br>19899. graph_c0; c120722. graph_c0; c973<br>61. graph_c0                                                       | K12637+K09587+K12638+K15639+K15639            |
| Biosynthesis of<br>unsaturated fatty<br>acids | ko01040 | 5 | 111 | 477 | 13897 | c115084. graph_c0; c121978. graph_c0; c1<br>23502. graph_c0; c132570. graph_c0; c133<br>558. graph_c0                                                      | K10251+K10257+K00232+K00059+K00232            |
| Linoleic acid<br>metabolism                   | ko00591 | 5 | 39  | 477 | 13897 | c102687. graph_c0; c134411. graph_c0; c1<br>34639. graph_c0; c23669. graph_c0; c9818<br>1. graph_c0                                                        | K00454+K00454+K00454+K00454+K01047            |
| beta-Alanine<br>metabolism                    | ko00410 | 5 | 176 | 477 | 13897 | c117302. graph_c0; c118423. graph_c0; c1<br>18938. graph_c0; c128735. graph_c0; c131<br>042. graph_c0                                                      | K00797+K00276+K05605+K00128+K00276            |
| Propanoate<br>metabolism                      | ko00640 | 5 | 140 | 477 | 13897 | c118938. graph_c0; c120405. graph_c1; c1<br>34376. graph_c0; c62501. graph_c0; c9001<br>2. graph_c0                                                        | K05605+K00016+K01963+K01895+K01962            |
| Glycerolipid                                  | ko00561 | 5 | 191 | 477 | 13897 | c122856. graph_c0; c127052. graph_c0; c1                                                                                                                   | K00011+K13508+K13513+K00128+K13508            |

|                                                     |         |   |     |     |       |                                                                                           |                                    |
|-----------------------------------------------------|---------|---|-----|-----|-------|-------------------------------------------------------------------------------------------|------------------------------------|
| metabolism                                          |         |   |     |     |       | 28220. graph_c0;c128735. graph_c0;c130294. graph_c0                                       |                                    |
| Nitrogen metabolism                                 | ko00910 | 5 | 100 | 477 | 13897 | c107127. graph_c0;c112691. graph_c0;c122099. graph_c0;c124635. graph_c0;c130648. graph_c0 | K01674+K01725+K01673+K01915+K02575 |
| Fatty acid biosynthesis                             | ko00061 | 5 | 136 | 477 | 13897 | c100226. graph_c0;c124335. graph_c0;c132570. graph_c0;c134376. graph_c0;c90012. graph_c0  | K09458+K10781+K00059+K01963+K01962 |
| Fatty acid elongation                               | ko00062 | 4 | 86  | 477 | 13897 | c101374. graph_c0;c108824. graph_c0;c115084. graph_c0;c70542. graph_c0                    | K15397+K01074+K10251+K15397        |
| Ether lipid metabolism                              | ko00565 | 4 | 87  | 477 | 13897 | c111700. graph_c0;c118376. graph_c0;c133450. graph_c0;c98181. graph_c0                    | K01115+K01115+K01115+K01047        |
| Ubiquinone and other terpenoid-quinone biosynthesis | ko00130 | 4 | 74  | 477 | 13897 | c119172. graph_c0;c121536. graph_c0;c123577. graph_c0;c125412. graph_c0                   | K00457+K00815+K02552+K01904        |
| DNA replication                                     | ko03030 | 4 | 216 | 477 | 13897 | c118790. graph_c0;c121683. graph_c0;c129051. graph_c0;c64367. graph_c0                    | K10740+K10745+K02325+K02326        |
| Nucleotide excision repair                          | ko03420 | 4 | 225 | 477 | 13897 | c118790. graph_c0;c129051. graph_c0;c64367. graph_c0;c97655. graph_c0                     | K10740+K02325+K02326+K03868        |
| Alanine, aspartate and glutamate metabolism         | ko00250 | 4 | 240 | 477 | 13897 | c110315. graph_c0;c120459. graph_c0;c124635. graph_c0;c130166. graph_c0                   | K00830+K00278+K01915+K01953        |
| 2-Oxocarboxylic acid metabolism                     | ko01210 | 4 | 216 | 477 | 13897 | c117589. graph_c0;c123819. graph_c0;c49644. graph_c0;c93628. graph_c0                     | K00620+K00826+K00030+K01704        |
| Ribosome                                            | ko03008 | 4 | 379 | 477 | 13897 | c116289. graph_c0;c122033. graph_c0;c1                                                    | K14521+K14538+K12619+K12619        |



|                                                        |         |   |     |     |       |                                                                         |                             |
|--------------------------------------------------------|---------|---|-----|-----|-------|-------------------------------------------------------------------------|-----------------------------|
| biogenesis in eukaryotes                               |         |   |     |     |       | 31538. graph_c1;c134441. graph_c0                                       |                             |
| SNARE interactions in vesicular transport              | ko04130 | 4 | 99  | 477 | 13897 | c109420. graph_c0;c113095. graph_c0;c122232. graph_c1;c132440. graph_c0 | K08486+K08506+K08486+K08492 |
| Flavonoid biosynthesis                                 | ko00941 | 4 | 64  | 477 | 13897 | c105653. graph_c0;c126380. graph_c0;c93168. graph_c0;c94554. graph_c0   | K01859+K13082+K00660+K05278 |
| Tropane, piperidine and pyridine alkaloid biosynthesis | ko00960 | 4 | 67  | 477 | 13897 | c118423. graph_c0;c121536. graph_c0;c122496. graph_c0;c131042. graph_c0 | K00276+K00815+K08081+K00276 |
| Pentose phosphate pathway                              | ko00030 | 3 | 196 | 477 | 13897 | c120124. graph_c0;c122721. graph_c0;c124834. graph_c0                   | K01057+K01835+K00615        |
| Valine, leucine and isoleucine degradation             | ko00280 | 3 | 223 | 477 | 13897 | c118938. graph_c0;c123819. graph_c0;c128735. graph_c0                   | K05605+K00826+K00128        |
| Riboflavin metabolism                                  | ko00740 | 3 | 26  | 477 | 13897 | c112874. graph_c0;c125704. graph_c0;c129304. graph_c0                   | K14652+K14379+K14652        |
| Sulfur relay system                                    | ko04122 | 3 | 37  | 477 | 13897 | c117167. graph_c0;c125242. graph_c0;c127214. graph_c1                   | K04487+K03639+K04487        |
| Sulfur metabolism                                      | ko00920 | 3 | 92  | 477 | 13897 | c124334. graph_c0;c132024. graph_c0;c88948. graph_c0                    | K01738+K01738+K13034        |
| Tryptophan metabolism                                  | ko00380 | 3 | 126 | 477 | 13897 | c125003. graph_c0;c127788. graph_c0;c128735. graph_c0                   | K07408+K11816+K00128        |
| Diterpenoid biosynthesis                               | ko00904 | 3 | 25  | 477 | 13897 | c113336. graph_c0;c130968. graph_c0;c89332. graph_c0                    | K04125+K04121+K17982        |

|                                             |         |   |     |     |       |                                                      |                      |
|---------------------------------------------|---------|---|-----|-----|-------|------------------------------------------------------|----------------------|
| Folate biosynthesis                         | ko00790 | 3 | 47  | 477 | 13897 | c125242. graph_c0;c126629. graph_c0;c86038. graph_c0 | K03639+K18482+K13941 |
| Steroid biosynthesis                        | ko00100 | 3 | 81  | 477 | 13897 | c125112. graph_c0;c130196. graph_c0;c97018. graph_c0 | K14423+K14423+K01853 |
| Monoterpenoid biosynthesis                  | ko00902 | 2 | 6   | 477 | 13897 | c102174. graph_c0;c122797. graph_c0                  | K15086+K15086        |
| Valine, leucine and isoleucine biosynthesis | ko00290 | 2 | 58  | 477 | 13897 | c123819. graph_c0;c93628. graph_c0                   | K00826+K01704        |
| Ascorbate and aldarate metabolism           | ko00053 | 2 | 134 | 477 | 13897 | c119013. graph_c0;c128735. graph_c0                  | K00469+K00128        |
| Pantothenate and CoA biosynthesis           | ko00770 | 2 | 80  | 477 | 13897 | c114123. graph_c0;c123819. graph_c0                  | K02201+K00826        |
| Biotin metabolism                           | ko00780 | 2 | 39  | 477 | 13897 | c100226. graph_c0;c132570. graph_c0                  | K09458+K00059        |
| Inositol phosphate metabolism               | ko00562 | 2 | 196 | 477 | 13897 | c119013. graph_c0;c127088. graph_c0                  | K00469+K00889        |
| Regulation of autophagy                     | ko04140 | 2 | 134 | 477 | 13897 | c117024. graph_c0;c117516. graph_c0                  | K07198+K08269        |
| One carbon pool by folate                   | ko00670 | 2 | 75  | 477 | 13897 | c112704. graph_c0;c51284. graph_c0                   | K01934+K00600        |
| Arachidonic acid metabolism                 | ko00590 | 2 | 51  | 477 | 13897 | c127844. graph_c0;c98181. graph_c0                   | K18592+K01047        |
| RNA polymerase                              | ko03020 | 2 | 150 | 477 | 13897 | c124206. graph_c0;c125604. graph_c0                  | K03014+K03040        |
| Sphingolipid metabolism                     | ko00600 | 2 | 111 | 477 | 13897 | c116191. graph_c0;c133691. graph_c1                  | K00654+K04713        |

|                                                        |         |   |     |     |       |                                     |               |
|--------------------------------------------------------|---------|---|-----|-----|-------|-------------------------------------|---------------|
| Carotenoid biosynthesis                                | ko00906 | 2 | 64  | 477 | 13897 | c122440. graph_c0;c91224. graph_c0  | K09840+K09843 |
| Phosphatidylinositol signaling system                  | ko04070 | 2 | 194 | 477 | 13897 | c112144. graph_c0;c127088. graph_c0 | K02183+K00889 |
| Lysine degradation                                     | ko00310 | 2 | 136 | 477 | 13897 | c109846. graph_c0;c128735. graph_c0 | K14157+K00128 |
| Proteasome                                             | ko03050 | 2 | 264 | 477 | 13897 | c121189. graph_c0;c88678. graph_c0  | K03062+K02734 |
| Taurine and hypotaurine metabolism                     | ko00430 | 1 | 26  | 477 | 13897 | c127844. graph_c0                   | K18592        |
| Non-homologous end-joining                             | ko03450 | 1 | 24  | 477 | 13897 | c124068. graph_c0                   | K10885        |
| Histidine metabolism                                   | ko00340 | 1 | 81  | 477 | 13897 | c128735. graph_c0                   | K00128        |
| Degradation of aromatic compounds                      | ko01220 | 1 | 27  | 477 | 13897 | c126578. graph_c0                   | K00121        |
| Lysine biosynthesis                                    | ko00300 | 1 | 42  | 477 | 13897 | c114056. graph_c0                   | K10206        |
| Glycosylphosphatidylinositol (GPI)-anchor biosynthesis | ko00563 | 1 | 58  | 477 | 13897 | c117847. graph_c0                   | K05283        |
| Homologous recombination                               | ko03440 | 1 | 157 | 477 | 13897 | c118790. graph_c0                   | K10740        |
| Mismatch repair                                        | ko03430 | 1 | 132 | 477 | 13897 | c118790. graph_c0                   | K10740        |

|                                              |         |   |     |     |       |                  |        |
|----------------------------------------------|---------|---|-----|-----|-------|------------------|--------|
| Other glycan<br>degradation                  | ko00511 | 1 | 81  | 477 | 13897 | c94189.graph_c0  | K01191 |
| Basal<br>transcription<br>factors            | ko03022 | 1 | 135 | 477 | 13897 | c133777.graph_c0 | K03131 |
| Aminoacyl-tRNA<br>biosynthesis               | ko00970 | 1 | 289 | 477 | 13897 | c131414.graph_c0 | K01866 |
| Nicotinate and<br>nicotinamide<br>metabolism | ko00760 | 1 | 43  | 477 | 13897 | c120459.graph_c0 | K00278 |
| Anthocyanin<br>biosynthesis                  | ko00942 | 1 | 4   | 477 | 13897 | c132750.graph_c0 | K12930 |
| C5-Branched<br>dibasic acid<br>metabolism    | ko00660 | 1 | 28  | 477 | 13897 | c93628.graph_c0  | K01704 |
| Selenocompound<br>metabolism                 | ko00450 | 1 | 89  | 477 | 13897 | c120855.graph_c0 | K01761 |

Table S6. KEGG pathway classification of DEGs in PR vs RO comparison.

| #Pathway                          | ko_ID   | Unigene | gene  | Unigene_all | gene_all                                                                                                                                                                                                                                                                                                                                                                                                                                                                                                                                                                                                                                                                                                                                                                                                                                                                                                             |                                                                                                                                                                                                                                                             |                                                                                                                                                                                                  |
|-----------------------------------|---------|---------|-------|-------------|----------------------------------------------------------------------------------------------------------------------------------------------------------------------------------------------------------------------------------------------------------------------------------------------------------------------------------------------------------------------------------------------------------------------------------------------------------------------------------------------------------------------------------------------------------------------------------------------------------------------------------------------------------------------------------------------------------------------------------------------------------------------------------------------------------------------------------------------------------------------------------------------------------------------|-------------------------------------------------------------------------------------------------------------------------------------------------------------------------------------------------------------------------------------------------------------|--------------------------------------------------------------------------------------------------------------------------------------------------------------------------------------------------|
| #KEGG_n                           | 477     | KEGG_N  | 13897 |             |                                                                                                                                                                                                                                                                                                                                                                                                                                                                                                                                                                                                                                                                                                                                                                                                                                                                                                                      |                                                                                                                                                                                                                                                             |                                                                                                                                                                                                  |
| Starch and sucrose metabolism     | ko00500 | 36      | 469   | 477         | 13897                                                                                                                                                                                                                                                                                                                                                                                                                                                                                                                                                                                                                                                                                                                                                                                                                                                                                                                |                                                                                                                                                                                                                                                             |                                                                                                                                                                                                  |
| Plant hormone signal transduction | ko04075 | 33      | 403   | 477         | 13897                                                                                                                                                                                                                                                                                                                                                                                                                                                                                                                                                                                                                                                                                                                                                                                                                                                                                                                |                                                                                                                                                                                                                                                             |                                                                                                                                                                                                  |
|                                   |         |         |       |             | c105513. graph_c1;c106004. graph_c0;c108042. graph_c0;c108790. graph_c0;c109671. graph_c0;c115711. graph_c0;c117587. graph_c0;c117822. graph_c0;c118113. graph_c0;c118816. graph_c0;c119141. graph_c0;c119325. graph_c0;c120576. graph_c0;c121742. graph_c0;c122721. graph_c0;c123210. graph_c0;c123220. graph_c0;c125155. graph_c1;c126580. graph_c0;c126811. graph_c0;c126934. graph_c0;c127107. graph_c0;c127792. graph_c0;c129616. graph_c0;c129750. graph_c0;c130158. graph_c0;c130187. graph_c0;c130727. graph_c1;c131002. graph_c1;c131646. graph_c1;c131799. graph_c0;c23686. graph_c0;c71123. graph_c0;c86535. graph_c0;c88845. graph_c0;c97687. graph_c0;c100991. graph_c0;c105815. graph_c0;c106087. graph_c0;c107593. graph_c0;c108427. graph_c0;c109272. graph_c0;c109646. graph_c0;c112138. graph_c0;c112179. graph_c0;c113017. graph_c0;c116573. graph_c0;c116665. graph_c0;c116968. graph_c0;c117784 | K01188+K01188+K18447+K01188+K05350+K01176+K00695+K01051+K01188+K01188+K00696+K01184+K01051+K01051+K01835+K05350+K01188+K01176+K01177+K01193+K01187+K00847+K01188+K01051+K01051+K01087+K00847+K01176+K00696+K00688+K01176+K01177+K01051+K01188+K05350+K01188 | K14487+K14505+K14490+K14492+K14490+K14492+K14488+K13464+K14488+K14484+K14505+K14488+K14432+K14487+K14488+K14496+K14488+K14488+K14497+K14498+K13464+K14484+K14505+K14490+K14512+K14491+K14491+K14 |

|                                 |         |    |     |     |       |                                                                                                                                                                                                                                                                                                                                                                                                                                                                                                                                                                                                                                                                                                                                                                                                                                                                                                                                                                                                                                                                                                                                                                        |                                                                                                                                                                                                                                                                                                                                                                                                                                  |
|---------------------------------|---------|----|-----|-----|-------|------------------------------------------------------------------------------------------------------------------------------------------------------------------------------------------------------------------------------------------------------------------------------------------------------------------------------------------------------------------------------------------------------------------------------------------------------------------------------------------------------------------------------------------------------------------------------------------------------------------------------------------------------------------------------------------------------------------------------------------------------------------------------------------------------------------------------------------------------------------------------------------------------------------------------------------------------------------------------------------------------------------------------------------------------------------------------------------------------------------------------------------------------------------------|----------------------------------------------------------------------------------------------------------------------------------------------------------------------------------------------------------------------------------------------------------------------------------------------------------------------------------------------------------------------------------------------------------------------------------|
|                                 |         |    |     |     |       | . graph_c0;c120105. graph_c1;c120345. gra<br>ph_c0;c120847. graph_c0;c121149. graph_c<br>0;c121691. graph_c0;c121767. graph_c0;c1<br>22051. graph_c0;c122394. graph_c0;c12304<br>8. graph_c0;c124750. graph_c1;c124826. gr<br>aph_c0;c125541. graph_c0;c127036. graph_<br>c1;c127324. graph_c0;c127580. graph_c0;c<br>127695. graph_c0;c130168. graph_c0;c1327<br>81. graph_c0;c133064. graph_c0<br>c101742. graph_c0;c105513. graph_c1;c106<br>004. graph_c0;c107475. graph_c0;c108790.<br>graph_c0;c109671. graph_c0;c111428. grap<br>h_c0;c111764. graph_c0;c114770. graph_c0<br>;c116628. graph_c0;c117640. graph_c0;c11<br>8113. graph_c0;c118247. graph_c0;c118816<br>. graph_c0;c120064. graph_c0;c120064. gra<br>ph_c1;c123210. graph_c0;c123220. graph_c<br>0;c125412. graph_c0;c127792. graph_c0;c1<br>29902. graph_c0;c130735. graph_c0;c13393<br>0. graph_c0;c50245. graph_c0;c86535. grap<br>h_c0;c86972. graph_c0;c88845. graph_c0;c<br>89173. graph_c0;c97687. graph_c0<br>c102478. graph_c0;c102533. graph_c0;c105<br>246. graph_c0;c108452. graph_c1;c111222.<br>graph_c0;c114175. graph_c0;c118085. grap<br>h_c0;c119933. graph_c0;c122506. graph_c0 | 488+K14488+K14505+K14509+K14492+<br>K14491<br>K00083+K01188+K01188+K00430+K011<br>88+K05350+K00430+K11188+K13066+K<br>00430+K12356+K01188+K00430+K0118<br>8+K13066+K13066+K05350+K01188+K0<br>1904+K01188+K13066+K00430+K00430<br>+K00083+K01188+K11188+K05350+K09<br>755+K01188<br>K02939+K02937+K02940+K02922+K028<br>66+K02922+K02988+K02880+K02959+K<br>02896+K02937+K02896+K02993+K0293<br>8+K02882+K02980+K02992+K02937+K0 |
| Phenylpropanoid<br>biosynthesis | ko00940 | 29 | 250 | 477 | 13897 |                                                                                                                                                                                                                                                                                                                                                                                                                                                                                                                                                                                                                                                                                                                                                                                                                                                                                                                                                                                                                                                                                                                                                                        |                                                                                                                                                                                                                                                                                                                                                                                                                                  |
| Ribosome                        | ko03010 | 24 | 996 | 477 | 13897 |                                                                                                                                                                                                                                                                                                                                                                                                                                                                                                                                                                                                                                                                                                                                                                                                                                                                                                                                                                                                                                                                                                                                                                        |                                                                                                                                                                                                                                                                                                                                                                                                                                  |







|                                 |         |    |     |     |       |                                                                                                                                                                                                                                                                                                                                                                                                                                                                                 |                                                                                                                               |
|---------------------------------|---------|----|-----|-----|-------|---------------------------------------------------------------------------------------------------------------------------------------------------------------------------------------------------------------------------------------------------------------------------------------------------------------------------------------------------------------------------------------------------------------------------------------------------------------------------------|-------------------------------------------------------------------------------------------------------------------------------|
| alpha-Linolenic acid metabolism | ko00592 | 18 | 130 | 477 | 13897 | 2441. graph_c0;c132982. graph_c1;c133136 . graph_c0;c134348. graph_c0;c134380. graph_c0;c50350. graph_c0;c88346. graph_c0;c91463. graph_c0 c102004. graph_c0;c102687. graph_c0;c109303. graph_c0;c109581. graph_c0;c115772. graph_c0;c117008. graph_c0;c118104. graph_h_c0;c118459. graph_c0;c120300. graph_c0;c121567. graph_c0;c123502. graph_c0;c123665. graph_c0;c125727. graph_c0;c133558 . graph_c0;c134411. graph_c0;c134639. graph_c0;c23669. graph_c0;c98181. graph_c0 | K18857+K00454+K08241+K18857+K01723+K10525+K18857+K01723+K05894+K01723+K00232+K10525+K08241+K00232+K00454+K00454+K00454+K01047 |
| Photosynthesis                  | ko00195 | 17 | 144 | 477 | 13897 | c100128. graph_c0;c101644. graph_c0;c104922. graph_c0;c105700. graph_c0;c108958. graph_c0;c109514. graph_c0;c109836. graph_h_c0;c111404. graph_c0;c120141. graph_c0;c124921. graph_c0;c125492. graph_c0;c126976. graph_c0;c128494. graph_c0;c130722 . graph_c0;c132793. graph_c0;c95982. graph_h_c0;c97392. graph_c0                                                                                                                                                            | K02115+K02638+K02639+K08902+K02641+K02692+K02115+K14332+K02707+K02694+K02109+K02113+K02691+K02710+K02705+K02641+K02717        |
| Oxidative phosphorylation       | ko00190 | 15 | 552 | 477 | 13897 | c100128. graph_c0;c105010. graph_c0;c109836. graph_c0;c112664. graph_c0;c120026. graph_c0;c121921. graph_c0;c125492. graph_h_c0;c126524. graph_c0;c126976. graph_c0                                                                                                                                                                                                                                                                                                             | K02115+K02152+K02115+K01535+K05577+K02150+K02109+K05582+K02113+K03883+K03881+K02132+K05579+K01535+K01535                      |

|                            |         |    |     |     |       |                                                                                                                                                                                                                                                                                                                                                                                                 |
|----------------------------|---------|----|-----|-----|-------|-------------------------------------------------------------------------------------------------------------------------------------------------------------------------------------------------------------------------------------------------------------------------------------------------------------------------------------------------------------------------------------------------|
|                            |         |    |     |     |       | <p>;c129271. graph_c0;c132160. graph_c0;c132549. graph_c0;c133939. graph_c0;c28152. graph_c0;c71577. graph_c0</p>                                                                                                                                                                                                                                                                               |
| Cyanoamino acid metabolism | ko00460 | 15 | 114 | 477 | 13897 | <p>c105513. graph_c1;c106004. graph_c0;c108790. graph_c0;c109671. graph_c0;c118113. graph_c0;c118816. graph_c0;c123210. graph_c0;c123220. graph_c0;c127792. graph_c0;c127844. graph_c0;c51284. graph_c0;c86535. graph_c0;c88845. graph_c0;c88948. graph_c0;c97687. graph_c0</p> <p>K01188+K01188+K01188+K05350+K01188+K01188+K05350+K01188+K01188+K18592+K00600+K01188+K05350+K13034+K01188</p> |
| Glutathione metabolism     | ko00480 | 14 | 235 | 477 | 13897 | <p>c110950. graph_c0;c111372. graph_c0;c112965. graph_c0;c117302. graph_c0;c122681. graph_c0;c125111. graph_c0;c125826. graph_c0;c127844. graph_c0;c128678. graph_c0;c131878. graph_c0;c51066. graph_c0;c71042. graph_c0;c96247. graph_c0;c98149. graph_c0</p> <p>K10808+K00799+K00799+K00797+K00799+K00799+K00799+K18592+K10807+K10808+K00799+K00799+K00799+K00799</p>                         |
| Phenylalanine metabolism   | ko00360 | 14 | 171 | 477 | 13897 | <p>c107475. graph_c0;c110715. graph_c0;c111428. graph_c0;c111764. graph_c0;c116628. graph_c0;c118247. graph_c0;c118423. graph_c0;c119172. graph_c0;c121536. graph_c0;c125412. graph_c0;c130735. graph_c0;c131042. graph_c0;c133930. graph_c0;c86972.</p> <p>K00430+K07253+K00430+K11188+K00430+K00430+K00276+K00457+K00815+K01904+K00430+K00276+K00430+K11188</p>                               |

|                                    |         |    |     |     |       |                                                                                                                                                                                                                                                           |                                                                                                   |
|------------------------------------|---------|----|-----|-----|-------|-----------------------------------------------------------------------------------------------------------------------------------------------------------------------------------------------------------------------------------------------------------|---------------------------------------------------------------------------------------------------|
|                                    |         |    |     |     |       | graph_c0                                                                                                                                                                                                                                                  |                                                                                                   |
|                                    |         |    |     |     |       | c100543. graph_c0;c108531. graph_c0;c108920. graph_c0;c115011. graph_c0;c117552. graph_c0;c119129. graph_c0;c123174. graph_c0;c123347. graph_c0;c123525. graph_c0;c128987. graph_c0;c131884. graph_c0;c133559. graph_c0;c97655. graph_c0;c97880. graph_c0 | K10579+K03094+K10144+K10144+K03347+K10583+K03354+K03094+K03363+K10581+K12456+K10144+K03868+K06689 |
| Ubiquitin mediated proteolysis     | ko04120 | 14 | 468 | 477 | 13897 |                                                                                                                                                                                                                                                           |                                                                                                   |
|                                    |         |    |     |     |       | c100613. graph_c0;c117302. graph_c0;c120405. graph_c1;c120855. graph_c0;c121536. graph_c0;c123728. graph_c0;c124334. graph_c0;c125674. graph_c0;c125789. graph_c0;c129490. graph_c0;c132024. graph_c0;c51012. graph_c0;c88948. graph_c0                   | K00025+K00797+K00016+K01761+K00815+K01762+K01738+K00547+K05933+K00026+K01738+K00789+K13034        |
| Cysteine and methionine metabolism | ko00270 | 13 | 289 | 477 | 13897 |                                                                                                                                                                                                                                                           |                                                                                                   |
|                                    |         |    |     |     |       | c102004. graph_c0;c109581. graph_c0;c111937. graph_c0;c118104. graph_c0;c120405. graph_c1;c122721. graph_c0;c126578. graph_c0;c128281. graph_c0;c128735. graph_c0;c134543. graph_c0;c134605. graph_c0;c62501. graph_c0;c85077. graph_c0                   | K18857+K18857+K01785+K18857+K00016+K01835+K00121+K01610+K00128+K01568+K01610+K01895+K00627        |
| Glycolysis / Gluconeogenesis       | ko00010 | 13 | 448 | 477 | 13897 |                                                                                                                                                                                                                                                           |                                                                                                   |
|                                    |         |    |     |     |       | c100613. graph_c0;c120405. graph_c1;c128281. graph_c0;c128366. graph_c0;c128735. graph_c0;c129490. graph_c0;c134376. graph_c0                                                                                                                             | K00025+K00016+K01610+K01595+K00128+K00026+K01963+K01610+K01895+K00627+K01679+K01962               |
| Pyruvate metabolism                | ko00620 | 12 | 357 | 477 | 13897 |                                                                                                                                                                                                                                                           |                                                                                                   |

|                                          |         |    |     |     |       |                                                                                                                                                                                                                                                                                                    |                                                                                     |
|------------------------------------------|---------|----|-----|-----|-------|----------------------------------------------------------------------------------------------------------------------------------------------------------------------------------------------------------------------------------------------------------------------------------------------------|-------------------------------------------------------------------------------------|
| Tyrosine metabolism                      | ko00350 | 12 | 121 | 477 | 13897 | h_c0;c134605.graph_c0;c62501.graph_c0;c85077.graph_c0;c88872.graph_c0;c90012.graph_c0<br>c102004.graph_c0;c109581.graph_c0;c110715.graph_c0;c118104.graph_c0;c118423.graph_c0;c119172.graph_c0;c121536.graph_c0;c126578.graph_c0;c130866.graph_c0;c131042.graph_c0;c23725.graph_c0;c23725.graph_c1 | K18857+K18857+K07253+K18857+K00276+K00457+K00815+K00121+K01592+K00276+K01592+K01592 |
| Endocytosis                              | ko04144 | 11 | 472 | 477 | 13897 | c108935.graph_c0;c111700.graph_c0;c112162.graph_c0;c114229.graph_c0;c118376.graph_c0;c127088.graph_c0;c131641.graph_c0;c131641.graph_c1;c131854.graph_c1;c133450.graph_c0;c23697.graph_c0                                                                                                          | K07904+K01115+K07904+K12489+K0115+K00889+K12489+K12489+K03283+K01115+K03283         |
| Cutin, suberine and wax biosynthesis     | ko00073 | 11 | 60  | 477 | 13897 | c124424.graph_c0;c124583.graph_c0;c127594.graph_c0;c128040.graph_c0;c131711.graph_c0;c132698.graph_c0;c133529.graph_c0;c86343.graph_c0;c88162.graph_c0;c97209.graph_c0;c99637.graph_c1                                                                                                             | K15404+K15398+K17991+K13356+K15404+K15398+K13407+K15398+K13356+K13356+K13356        |
| Pentose and glucuronate interconversions | ko00040 | 11 | 202 | 477 | 13897 | c117822.graph_c0;c119325.graph_c0;c120576.graph_c0;c121742.graph_c0;c122856.graph_c0;c124896.graph_c0;c128735.graph_c0;c129616.graph_c0;c129750.graph_c0                                                                                                                                           | K01051+K01184+K01051+K01051+K00011+K01728+K00128+K01051+K01051+K01728+K01051        |

|                                                              |         |    |     |     |       |                                                                                                                                                                                          |                                                                               |
|--------------------------------------------------------------|---------|----|-----|-----|-------|------------------------------------------------------------------------------------------------------------------------------------------------------------------------------------------|-------------------------------------------------------------------------------|
|                                                              |         |    |     |     |       | ;c23628.graph_c0;c71123.graph_c0<br>c109491.graph_c0;c116941.graph_c0;c120<br>290.graph_c0;c125901.graph_c0;c126315.                                                                     | K04077+K12606+K12608+K04077+K131                                              |
| RNA degradation                                              | ko03018 | 10 | 419 | 477 | 13897 | graph_c0;c130826.graph_c0;c131538.grap<br>h_c1;c134322.graph_c0;c134441.graph_c0<br>;c93753.graph_c0<br>c111454.graph_c0;c113927.graph_c0;c121<br>595.graph_c0;c121595.graph_c1;c122587. | 26+K12603+K12619+K14442+K12619+K<br>14442                                     |
| Terpenoid backbone<br>biosynthesis                           | ko00900 | 10 | 155 | 477 | 13897 | graph_c0;c124462.graph_c0;c125410.grap<br>h_c0;c127762.graph_c1;c81933.graph_c0;<br>c88832.graph_c0<br>c101979.graph_c0;c102878.graph_c0;c117<br>781.graph_c1;c121090.graph_c0;c121536.  | K13789+K05356+K01662+K01662+K158<br>89+K13789+K10960+K11778+K00021+K<br>00021 |
| Phenylalanine,<br>tyrosine and<br>tryptophan<br>biosynthesis | ko00400 | 10 | 117 | 477 | 13897 | graph_c0;c122230.graph_c0;c129927.grap<br>h_c0;c133226.graph_c0;c71676.graph_c0;<br>c95528.graph_c0<br>c106554.graph_c0;c122721.graph_c0;c123<br>063.graph_c0;c124607.graph_c0;c127107.  | K05359+K15227+K06001+K15227+K008<br>15+K01695+K13832+K13832+K15227+K<br>00891 |
| Amino sugar and<br>nucleotide sugar<br>metabolism            | ko00520 | 10 | 335 | 477 | 13897 | graph_c0;c130187.graph_c0;c131811.grap<br>h_c0;c54775.graph_c0;c88590.graph_c0;c<br>89832.graph_c0<br>c100226.graph_c0;c108824.graph_c0;c115<br>084.graph_c0;c121978.graph_c0;c123502.   | K01183+K01835+K01183+K01209+K008<br>47+K00847+K01183+K01784+K01784+K<br>12449 |
| Fatty acid<br>metabolism                                     | ko01212 | 10 | 268 | 477 | 13897 | graph_c0;c124335.graph_c0;c132570.grap<br>h_c0;c133558.graph_c0;c134376.graph_c0<br>;c90012.graph_c0                                                                                     | K09458+K01074+K10251+K10257+K002<br>32+K10781+K00059+K00232+K01963+K<br>01962 |

|                                |         |    |     |     |       |                                                                                                                                                                                                                     |                                                                       |
|--------------------------------|---------|----|-----|-----|-------|---------------------------------------------------------------------------------------------------------------------------------------------------------------------------------------------------------------------|-----------------------------------------------------------------------|
| Pyrimidine metabolism          | ko00240 | 10 | 456 | 477 | 13897 | c102867. graph_c0; c110950. graph_c0; c114780. graph_c0; c124206. graph_c0; c125604. graph_c0; c128678. graph_c0; c129051. graph_c0; c131878. graph_c0; c64367. graph_c0; c93528. graph_c0                          | K00857+K10808+K00876+K03014+K03040+K10807+K02325+K10808+K02326+K01520 |
| Glycerophospholipid metabolism | ko00564 | 9  | 243 | 477 | 13897 | c105872. graph_c0; c111700. graph_c0; c118376. graph_c0; c124631. graph_c0; c127052. graph_c0; c128220. graph_c0; c130294. graph_c0; c133450. graph_c0; c98181. graph_c0 c111937. graph_c0; c121255. graph_c1; c122 | K06130+K01115+K01115+K06129+K13508+K13513+K13508+K01115+K01047        |
| Galactose metabolism           | ko00052 | 9  | 166 | 477 | 13897 | 721. graph_c0; c122856. graph_c0; c126811. graph_c0; c126934. graph_c0; c127648. graph_c0; c54775. graph_c0; c88590. graph_c0 c110315. graph_c0; c123153. graph_c0; c123                                            | K01785+K06617+K01835+K00011+K01193+K01187+K18819+K01784+K01784        |
| Peroxisome                     | ko04146 | 9  | 287 | 477 | 13897 | 502. graph_c0; c128040. graph_c0; c129908. graph_c0; c133558. graph_c0; c88162. graph_c0; c97209. graph_c0; c99637. graph_c1 c102019. graph_c0; c116762. graph_c0; c117                                             | K00830+K13346+K00232+K13356+K11517+K00232+K13356+K13356+K13356        |
| RNA transport                  | ko03013 | 8  | 630 | 477 | 13897 | 960. graph_c0; c120059. graph_c0; c125991. graph_c0; c126315. graph_c0; c130438. graph_c0; c131752. graph_c0 c112666. graph_c0; c117167. graph_c0; c117                                                             | K12882+K03257+K03260+K03237+K03231+K13126+K14293+K03250               |
| Thiamine metabolism            | ko00730 | 8  | 45  | 477 | 13897 | 973. graph_c0; c121244. graph_c0; c121595. graph_c0; c121595. graph_c1; c127214. graph_c1; c127921. graph_c0                                                                                                        | K03146+K04487+K06928+K03146+K01662+K01662+K04487+K00878               |
| Glyoxylate and                 | ko00630 | 8  | 252 | 477 | 13897 | c100613. graph_c0; c102566. graph_c0; c110                                                                                                                                                                          | K00025+K00122+K00830+K01915+K000                                      |

|                                          |         |   |     |     |       |                                                                                                                                     |                                                  |
|------------------------------------------|---------|---|-----|-----|-------|-------------------------------------------------------------------------------------------------------------------------------------|--------------------------------------------------|
| dicarboxylate metabolism                 |         |   |     |     |       | 315. graph_c0; c124635. graph_c0; c129490. graph_c0; c129908. graph_c0; c51284. graph_c0; c96010. graph_c0                          | 26+K11517+K00600+K02437                          |
| Phagosome                                | ko04145 | 7 | 348 | 477 | 13897 | c105010. graph_c0; c113632. graph_c0; c121921. graph_c0; c123483. graph_c0; c132440. graph_c0; c70889. graph_c0; c97672. graph_c0   | K02152+K07375+K02150+K04392+K08492+K07374+K07375 |
| mRNA surveillance pathway                | ko03015 | 7 | 452 | 477 | 13897 | c102019. graph_c0; c118482. graph_c0; c124542. graph_c0; c126315. graph_c0; c129634. graph_c0; c132292. graph_c2; c88662. graph_c0  | K12882+K03456+K14400+K13126+K03265+K03456+K03265 |
| Fructose and mannose metabolism          | ko00051 | 7 | 201 | 477 | 13897 | c108042. graph_c0; c114913. graph_c0; c118742. graph_c0; c122856. graph_c0; c127107. graph_c0; c130187. graph_c0; c130978. graph_c0 | K18447+K00895+K00895+K00011+K00847+K00847+K00895 |
| Zeatin biosynthesis                      | ko00908 | 7 | 19  | 477 | 13897 | c124810. graph_c0; c125250. graph_c0; c129356. graph_c0; c130317. graph_c0; c130652. graph_c1; c131511. graph_c0; c132025. graph_c0 | K00279+K10760+K13495+K00279+K10717+K00791+K00279 |
| Fatty acid degradation                   | ko00071 | 7 | 197 | 477 | 13897 | c102004. graph_c0; c109581. graph_c0; c118104. graph_c0; c123502. graph_c0; c126578. graph_c0; c128735. graph_c0; c133558. graph_c0 | K18857+K18857+K18857+K00232+K00121+K00128+K00232 |
| Glycine, serine and threonine metabolism | ko00260 | 7 | 226 | 477 | 13897 | c110315. graph_c0; c117781. graph_c1; c118423. graph_c0; c122230. graph_c0; c131042. graph_c0; c51284. graph_c0; c96010. graph_c0   | K00830+K06001+K00276+K01695+K00276+K00600+K02437 |

|                                             |         |   |     |     |       |                                                                                                                                  |                                                  |
|---------------------------------------------|---------|---|-----|-----|-------|----------------------------------------------------------------------------------------------------------------------------------|--------------------------------------------------|
| Citrate cycle (TCA cycle)                   | ko00020 | 7 | 304 | 477 | 13897 | c0<br>c100613. graph_c0;c128281. graph_c0;c129490. graph_c0;c134605. graph_c0;c49644. graph_c0;c85077. graph_c0;c88872. graph_c0 | K00025+K01610+K00026+K01610+K00030+K00627+K01679 |
| Carbon fixation in photosynthetic organisms | ko00710 | 7 | 282 | 477 | 13897 | c100613. graph_c0;c123772. graph_c0;c124834. graph_c0;c128281. graph_c0;c128366. graph_c0;c129490. graph_c0;c134605. graph_c0    | K00025+K00855+K00615+K01610+K01595+K00026+K01610 |
| Isoquinoline alkaloid biosynthesis          | ko00950 | 6 | 54  | 477 | 13897 | c118423. graph_c0;c121536. graph_c0;c130866. graph_c0;c131042. graph_c0;c23725. graph_c0;c23725. graph_c1                        | K00276+K00815+K01592+K00276+K01592+K01592        |
| Porphyrin and chlorophyll metabolism        | ko00860 | 6 | 131 | 477 | 13897 | c121882. graph_c0;c123884. graph_c0;c125410. graph_c0;c127890. graph_c0;c127890. graph_c1;c130025. graph_c0                      | K04035+K00218+K10960+K03403+K03403+K13071        |
| ABC transporters                            | ko02010 | 6 | 155 | 477 | 13897 | c119157. graph_c0;c126614. graph_c0;c130859. graph_c0;c131196. graph_c0;c132418. graph_c0;c134352. graph_c0                      | K05658+K05658+K05658+K05658+K05658+K05658        |
| Base excision repair                        | ko03410 | 6 | 137 | 477 | 13897 | c110971. graph_c0;c121800. graph_c0;c124043. graph_c0;c129051. graph_c0;c64367. graph_c0;c97798. graph_c0                        | K10798+K01142+K10798+K02325+K02326+K10798        |
| Arginine and proline metabolism             | ko00330 | 6 | 287 | 477 | 13897 | c117302. graph_c0;c117589. graph_c0;c118697. graph_c0;c124635. graph_c0;c128735. graph_c0;c130274. graph_c0                      | K00797+K00620+K00611+K01915+K00128+K01427        |
| Photosynthesis - antenna proteins           | ko00196 | 6 | 52  | 477 | 13897 | c100527. graph_c0;c106848. graph_c0;c109381. graph_c0;c114287. graph_c0;c71681. g                                                | K08910+K08909+K08916+K08908+K08913+K08913        |



|                                         |         |   |     |     |       |                                                                                                                                               |                                           |
|-----------------------------------------|---------|---|-----|-----|-------|-----------------------------------------------------------------------------------------------------------------------------------------------|-------------------------------------------|
| Circadian rhythm - plant                | ko04712 | 6 | 88  | 477 | 13897 | raph_c0;c89965. graph_c0<br>c112186. graph_c0;c126452. graph_c1;c127<br>832. graph_c0;c130328. graph_c0;c132912.<br>graph_c0;c93168. graph_c0 | K16166+K12130+K16241+K12129+K12129+K00660 |
| Spliceosome                             | ko03040 | 6 | 868 | 477 | 13897 | c102019. graph_c0;c120047. graph_c0;c131<br>854. graph_c1;c23697. graph_c0;c71357. gr<br>aph_c0;c91908. graph_c0                              | K12882+K12830+K03283+K03283+K12833+K12833 |
| Brassinosteroid biosynthesis            | ko00905 | 5 | 20  | 477 | 13897 | c105790. graph_c0;c118316. graph_c0;c119<br>899. graph_c0;c120722. graph_c0;c97361. g<br>raph_c0                                              | K12637+K09587+K12638+K15639+K15639        |
| Biosynthesis of unsaturated fatty acids | ko01040 | 5 | 111 | 477 | 13897 | c115084. graph_c0;c121978. graph_c0;c123<br>502. graph_c0;c132570. graph_c0;c133558.<br>graph_c0                                              | K10251+K10257+K00232+K00059+K00232        |
| Linoleic acid metabolism                | ko00591 | 5 | 39  | 477 | 13897 | c102687. graph_c0;c134411. graph_c0;c134<br>639. graph_c0;c23669. graph_c0;c98181. gr<br>aph_c0                                               | K00454+K00454+K00454+K00454+K01047        |
| beta-Alanine metabolism                 | ko00410 | 5 | 176 | 477 | 13897 | c117302. graph_c0;c118423. graph_c0;c118<br>938. graph_c0;c128735. graph_c0;c131042.<br>graph_c0                                              | K00797+K00276+K05605+K00128+K00276        |
| Propanoate metabolism                   | ko00640 | 5 | 140 | 477 | 13897 | c118938. graph_c0;c120405. graph_c1;c134<br>376. graph_c0;c62501. graph_c0;c90012. gr<br>aph_c0                                               | K05605+K00016+K01963+K01895+K01962        |
| Glycerolipid metabolism                 | ko00561 | 5 | 191 | 477 | 13897 | c122856. graph_c0;c127052. graph_c0;c128<br>220. graph_c0;c128735. graph_c0;c130294.<br>graph_c0                                              | K00011+K13508+K13513+K00128+K13508        |
| Nitrogen                                | ko00910 | 5 | 100 | 477 | 13897 | c107127. graph_c0;c112691. graph_c0;c122                                                                                                      | K01674+K01725+K01673+K01915+K025          |

|                                                     |         |   |     |     |       |                                                                                              |                                    |
|-----------------------------------------------------|---------|---|-----|-----|-------|----------------------------------------------------------------------------------------------|------------------------------------|
| metabolism                                          |         |   |     |     |       | 099. graph_c0; c124635. graph_c0; c130648. graph_c0                                          | 75                                 |
| Fatty acid biosynthesis                             | ko00061 | 5 | 136 | 477 | 13897 | c100226. graph_c0; c124335. graph_c0; c132570. graph_c0; c134376. graph_c0; c90012. graph_c0 | K09458+K10781+K00059+K01963+K01962 |
| Fatty acid elongation                               | ko00062 | 4 | 86  | 477 | 13897 | c101374. graph_c0; c108824. graph_c0; c115084. graph_c0; c70542. graph_c0                    | K15397+K01074+K10251+K15397        |
| Ether lipid metabolism                              | ko00565 | 4 | 87  | 477 | 13897 | c111700. graph_c0; c118376. graph_c0; c133450. graph_c0; c98181. graph_c0                    | K01115+K01115+K01115+K01047        |
| Ubiquinone and other terpenoid-quinone biosynthesis | ko00130 | 4 | 74  | 477 | 13897 | c119172. graph_c0; c121536. graph_c0; c123577. graph_c0; c125412. graph_c0                   | K00457+K00815+K02552+K01904        |
| DNA replication                                     | ko03030 | 4 | 216 | 477 | 13897 | c118790. graph_c0; c121683. graph_c0; c129051. graph_c0; c64367. graph_c0                    | K10740+K10745+K02325+K02326        |
| Nucleotide excision repair                          | ko03420 | 4 | 225 | 477 | 13897 | c118790. graph_c0; c129051. graph_c0; c64367. graph_c0; c97655. graph_c0                     | K10740+K02325+K02326+K03868        |
| Alanine, aspartate and glutamate metabolism         | ko00250 | 4 | 240 | 477 | 13897 | c110315. graph_c0; c120459. graph_c0; c124635. graph_c0; c130166. graph_c0                   | K00830+K00278+K01915+K01953        |
| 2-Oxocarboxylic acid metabolism                     | ko01210 | 4 | 216 | 477 | 13897 | c117589. graph_c0; c123819. graph_c0; c49644. graph_c0; c93628. graph_c0                     | K00620+K00826+K00030+K01704        |
| Ribosome biogenesis in eukaryotes                   | ko03008 | 4 | 379 | 477 | 13897 | c116289. graph_c0; c122033. graph_c0; c131538. graph_c1; c134441. graph_c0                   | K14521+K14538+K12619+K12619        |
| SNARE interactions                                  | ko04130 | 4 | 99  | 477 | 13897 | c109420. graph_c0; c113095. graph_c0; c122                                                   | K08486+K08506+K08486+K08492        |

|                                                        |         |   |     |     |       |                                                                            |                             |
|--------------------------------------------------------|---------|---|-----|-----|-------|----------------------------------------------------------------------------|-----------------------------|
| in vesicular transport                                 |         |   |     |     |       | 232. graph_c1; c132440. graph_c0                                           |                             |
| Flavonoid biosynthesis                                 | ko00941 | 4 | 64  | 477 | 13897 | c105653. graph_c0; c126380. graph_c0; c93168. graph_c0; c94554. graph_c0   | K01859+K13082+K00660+K05278 |
| Tropane, piperidine and pyridine alkaloid biosynthesis | ko00960 | 4 | 67  | 477 | 13897 | c118423. graph_c0; c121536. graph_c0; c122496. graph_c0; c131042. graph_c0 | K00276+K00815+K08081+K00276 |
| Pentose phosphate pathway                              | ko00030 | 3 | 196 | 477 | 13897 | c120124. graph_c0; c122721. graph_c0; c124834. graph_c0                    | K01057+K01835+K00615        |
| Valine, leucine and isoleucine degradation             | ko00280 | 3 | 223 | 477 | 13897 | c118938. graph_c0; c123819. graph_c0; c128735. graph_c0                    | K05605+K00826+K00128        |
| Riboflavin metabolism                                  | ko00740 | 3 | 26  | 477 | 13897 | c112874. graph_c0; c125704. graph_c0; c129304. graph_c0                    | K14652+K14379+K14652        |
| Sulfur relay system                                    | ko04122 | 3 | 37  | 477 | 13897 | c117167. graph_c0; c125242. graph_c0; c127214. graph_c1                    | K04487+K03639+K04487        |
| Sulfur metabolism                                      | ko00920 | 3 | 92  | 477 | 13897 | c124334. graph_c0; c132024. graph_c0; c88948. graph_c0                     | K01738+K01738+K13034        |
| Tryptophan metabolism                                  | ko00380 | 3 | 126 | 477 | 13897 | c125003. graph_c0; c127788. graph_c0; c128735. graph_c0                    | K07408+K11816+K00128        |
| Diterpenoid biosynthesis                               | ko00904 | 3 | 25  | 477 | 13897 | c113336. graph_c0; c130968. graph_c0; c89332. graph_c0                     | K04125+K04121+K17982        |
| Folate biosynthesis                                    | ko00790 | 3 | 47  | 477 | 13897 | c125242. graph_c0; c126629. graph_c0; c86038. graph_c0                     | K03639+K18482+K13941        |
| Steroid                                                | ko00100 | 3 | 81  | 477 | 13897 | c125112. graph_c0; c130196. graph_c0; c970                                 | K14423+K14423+K01853        |

|                                             |         |   |     |     |       |                                     |               |
|---------------------------------------------|---------|---|-----|-----|-------|-------------------------------------|---------------|
| biosynthesis                                |         |   |     |     |       | 18. graph_c0                        |               |
| Monoterpenoid biosynthesis                  | ko00902 | 2 | 6   | 477 | 13897 | c102174. graph_c0;c122797. graph_c0 | K15086+K15086 |
| Valine, leucine and isoleucine biosynthesis | ko00290 | 2 | 58  | 477 | 13897 | c123819. graph_c0;c93628. graph_c0  | K00826+K01704 |
| Ascorbate and aldarate metabolism           | ko00053 | 2 | 134 | 477 | 13897 | c119013. graph_c0;c128735. graph_c0 | K00469+K00128 |
| Pantothenate and CoA biosynthesis           | ko00770 | 2 | 80  | 477 | 13897 | c114123. graph_c0;c123819. graph_c0 | K02201+K00826 |
| Biotin metabolism                           | ko00780 | 2 | 39  | 477 | 13897 | c100226. graph_c0;c132570. graph_c0 | K09458+K00059 |
| Inositol phosphate metabolism               | ko00562 | 2 | 196 | 477 | 13897 | c119013. graph_c0;c127088. graph_c0 | K00469+K00889 |
| Regulation of autophagy                     | ko04140 | 2 | 134 | 477 | 13897 | c117024. graph_c0;c117516. graph_c0 | K07198+K08269 |
| One carbon pool by folate                   | ko00670 | 2 | 75  | 477 | 13897 | c112704. graph_c0;c51284. graph_c0  | K01934+K00600 |
| Arachidonic acid metabolism                 | ko00590 | 2 | 51  | 477 | 13897 | c127844. graph_c0;c98181. graph_c0  | K18592+K01047 |
| RNA polymerase                              | ko03020 | 2 | 150 | 477 | 13897 | c124206. graph_c0;c125604. graph_c0 | K03014+K03040 |
| Sphingolipid metabolism                     | ko00600 | 2 | 111 | 477 | 13897 | c116191. graph_c0;c133691. graph_c1 | K00654+K04713 |
| Carotenoid biosynthesis                     | ko00906 | 2 | 64  | 477 | 13897 | c122440. graph_c0;c91224. graph_c0  | K09840+K09843 |
| Phosphatidylinosi                           | ko04070 | 2 | 194 | 477 | 13897 | c112144. graph_c0;c127088. graph_c0 | K02183+K00889 |

---

|                                                        |         |   |     |     |       |                                   |               |
|--------------------------------------------------------|---------|---|-----|-----|-------|-----------------------------------|---------------|
| tol signaling system                                   |         |   |     |     |       |                                   |               |
| Lysine degradation                                     | ko00310 | 2 | 136 | 477 | 13897 | c109846.graph_c0;c128735.graph_c0 | K14157+K00128 |
| Proteasome                                             | ko03050 | 2 | 264 | 477 | 13897 | c121189.graph_c0;c88678.graph_c0  | K03062+K02734 |
| Taurine and hypotaurine metabolism                     | ko00430 | 1 | 26  | 477 | 13897 | c127844.graph_c0                  | K18592        |
| Non-homologous end-joining                             | ko03450 | 1 | 24  | 477 | 13897 | c124068.graph_c0                  | K10885        |
| Histidine metabolism                                   | ko00340 | 1 | 81  | 477 | 13897 | c128735.graph_c0                  | K00128        |
| Degradation of aromatic compounds                      | ko01220 | 1 | 27  | 477 | 13897 | c126578.graph_c0                  | K00121        |
| Lysine biosynthesis                                    | ko00300 | 1 | 42  | 477 | 13897 | c114056.graph_c0                  | K10206        |
| Glycosylphosphatidylinositol (GPI)-anchor biosynthesis | ko00563 | 1 | 58  | 477 | 13897 | c117847.graph_c0                  | K05283        |
| Homologous recombination                               | ko03440 | 1 | 157 | 477 | 13897 | c118790.graph_c0                  | K10740        |
| Mismatch repair                                        | ko03430 | 1 | 132 | 477 | 13897 | c118790.graph_c0                  | K10740        |
| Other glycan degradation                               | ko00511 | 1 | 81  | 477 | 13897 | c94189.graph_c0                   | K01191        |
| Basal                                                  | ko03022 | 1 | 135 | 477 | 13897 | c133777.graph_c0                  | K03131        |

---

---

|                                        |         |   |     |     |       |                  |  |        |
|----------------------------------------|---------|---|-----|-----|-------|------------------|--|--------|
| transcription factors                  |         |   |     |     |       |                  |  |        |
| Aminoacyl-tRNA biosynthesis            | ko00970 | 1 | 289 | 477 | 13897 | c131414.graph_c0 |  | K01866 |
| Nicotinate and nicotinamide metabolism | ko00760 | 1 | 43  | 477 | 13897 | c120459.graph_c0 |  | K00278 |
| Anthocyanin biosynthesis               | ko00942 | 1 | 4   | 477 | 13897 | c132750.graph_c0 |  | K12930 |
| C5-Branched dibasic acid metabolism    | ko00660 | 1 | 28  | 477 | 13897 | c93628.graph_c0  |  | K01704 |
| Selenocompound metabolism              | ko00450 | 1 | 89  | 477 | 13897 | c120855.graph_c0 |  | K01761 |

---

Table S7. KEGG pathway classification of DEGs in PO vs RO comparison.

| #Pathway                                | ko_ID       | Unigene | gene  | Unigene_<br>all | gene_all |                                                                                                                                                                                                                                                                                                                                                                                                                                                                                                                                                                                                                                                                                     |
|-----------------------------------------|-------------|---------|-------|-----------------|----------|-------------------------------------------------------------------------------------------------------------------------------------------------------------------------------------------------------------------------------------------------------------------------------------------------------------------------------------------------------------------------------------------------------------------------------------------------------------------------------------------------------------------------------------------------------------------------------------------------------------------------------------------------------------------------------------|
| #KEGG_n                                 |             | KEGG_N  | 13897 |                 |          |                                                                                                                                                                                                                                                                                                                                                                                                                                                                                                                                                                                                                                                                                     |
| Starch and sucrose<br>metabolism        | ko005<br>00 | 37      | 469   | 408             | 13897    | c112594. graph_c0;c113248. graph_c0;c115504. graph_c0;c115711. graph_c0;c117587. graph_c0;c117851. graph_c0;c117966. graph_c0;c118113. graph_c0;c118816. graph_c0;c119325. graph_c0;c120249. graph_c0;c120576. graph_c0;c120604. graph_c0;c121742. graph_c0;c121995. graph_c0;c124410. graph_c0;c125113. graph_c0;c125202. graph_c0;c126509. graph_c1;c126580. graph_c0;c126605. graph_c0;c127309. graph_c0;c127792. graph_c0;c128185. graph_c0;c128547. graph_c1;c129616. graph_c0;c130060. graph_c0;c130684. graph_c0;c131799. graph_c0;c132238. graph_c0;c132359. graph_c1;c23686. graph_c0;c71123. graph_c0;c86535. graph_c0;c87790. graph_c0;c94374. graph_c0;c97687. graph_c0 |
| Plant hormone<br>signal<br>transduction | ko040<br>75 | 26      | 403   | 408             | 13897    | c100991. graph_c0;c102167. graph_c0;c104874. graph_c0;c105109. graph_c0;c110148. graph_c0;c112179. graph_c0;c112371. graph_c0;c112578. graph_c0;c112898. graph_c0;c113017. graph_c0;c116665. graph_c0;c117096. graph_c0;c117362. graph_c0;c120105. graph_c1;c14487+K14488+K14488+K14497+K14490+K14488+K14488+K14492+K14516+K14484+K14488+K14496+K14498+K14488+K14496+K14488+K14488+K14512+K14488+K16189+K14432+K14432+K14515+K14509+K1                                                                                                                                                                                                                                              |

|                                          |         |    |     |     |       |                                                                                                                                                                                                                                                                                                                                                                                                                                                                                               |                                                                                                                                                                                |
|------------------------------------------|---------|----|-----|-----|-------|-----------------------------------------------------------------------------------------------------------------------------------------------------------------------------------------------------------------------------------------------------------------------------------------------------------------------------------------------------------------------------------------------------------------------------------------------------------------------------------------------|--------------------------------------------------------------------------------------------------------------------------------------------------------------------------------|
|                                          |         |    |     |     |       | 20345. graph_c0;c120546. graph_c0;c120847. graph_c0<br>;c124826. graph_c0;c127580. graph_c0;c127688. graph_c0;<br>c131060. graph_c0;c131060. graph_c3;c131976. graph_c0;<br>c132990. graph_c0;c88326. graph_c0;c90004. graph_c0                                                                                                                                                                                                                                                               | 4488+K14496                                                                                                                                                                    |
| Phenylpropanoid biosynthesis             | ko00940 | 25 | 250 | 408 | 13897 | c101742. graph_c0;c101742. graph_c1;c111410. graph_c0;<br>c111428. graph_c0;c114770. graph_c0;c117640. graph_c0;<br>c118113. graph_c0;c118816. graph_c0;c119082. graph_c0;<br>c120604. graph_c0;c121941. graph_c0;c121995. graph_c0;<br>c125198. graph_c0;c125906. graph_c0;c127309. graph_c0;<br>c127792. graph_c0;c128306. graph_c0;c128547. graph_c1;<br>c129902. graph_c0;c133129. graph_c0;c133930. graph_c0;<br>c50245. graph_c0;c86535. graph_c0;c89173. graph_c0;<br>c97687. graph_c0 | K00083+K00083+K13065+K00430+K13066+K12356+K01188+K01188+K01904+K01188+K00430+K01188+K00430+K00430+K0538+K01188+K00083+K01188+K13066+K10775+K00430+K00083+K01188+K09755+K01188  |
| Pentose and glucuronate interconversions | ko00040 | 25 | 202 | 408 | 13897 | c102361. graph_c0;c102552. graph_c0;c112594. graph_c0;<br>c112781. graph_c0;c113248. graph_c0;c116799. graph_c0;<br>c117851. graph_c0;c117966. graph_c0;c119325. graph_c0;<br>c120576. graph_c0;c121742. graph_c0;c122856. graph_c0;<br>c123853. graph_c0;c124325. graph_c0;c124325. graph_c1;<br>c124410. graph_c0;c125113. graph_c0;c125202. graph_c0;<br>c126509. graph_c1;c129616. graph_c0;c132359. graph_c1;<br>c23628. graph_c0;c71123. graph_c0;c87790. graph_c0;<br>c94374. graph_c0 | K01728+K01728+K01213+K01728+K00012+K01728+K01051+K01051+K01184+K01051+K01051+K00011+K01728+K01728+K01728+K01051+K01213+K01051+K00012+K01051+K01051+K01728+K01051+K01051+K01051 |
| Carbon metabolism                        | ko01200 | 24 | 955 | 408 | 13897 | c106243. graph_c0;c112914. graph_c0;c114199. graph_c0;<br>c118228. graph_c1;c118938. graph_c0;c119204. gra                                                                                                                                                                                                                                                                                                                                                                                    | K00134+K00134+K01100+K00121+K05605+K05298+K01057+K00844+K01895+K0087                                                                                                           |



|                             |             |    |     |     |       |                                                                                                                                                                                                                                                                                                                                                                                                                                                                                                                                                                                                                                                                                                                                                                                                                                                                                                                                                                                                                                                                                                                                                                                                              |                                                                                                                                                                                                                                                                |
|-----------------------------|-------------|----|-----|-----|-------|--------------------------------------------------------------------------------------------------------------------------------------------------------------------------------------------------------------------------------------------------------------------------------------------------------------------------------------------------------------------------------------------------------------------------------------------------------------------------------------------------------------------------------------------------------------------------------------------------------------------------------------------------------------------------------------------------------------------------------------------------------------------------------------------------------------------------------------------------------------------------------------------------------------------------------------------------------------------------------------------------------------------------------------------------------------------------------------------------------------------------------------------------------------------------------------------------------------|----------------------------------------------------------------------------------------------------------------------------------------------------------------------------------------------------------------------------------------------------------------|
| Plant-pathogen interaction  | ko046<br>26 | 18 | 373 | 408 | 13897 | ph_c0;c119582.graph_c1;c120249.graph_c0;c120295.graph_c0;c123524.graph_c0;c123772.graph_c0;c124334.graph_c0;c124834.graph_c0;c129153.graph_c0;c129490.graph_c0;c130262.graph_c0;c132024.graph_c0;c133476.graph_c0;c134598.graph_c0;c134605.graph_c0;c49644.graph_c0;c50718.graph_c0;c51688.graph_c0;c62501.graph_c0<br>c100506.graph_c0;c105088.graph_c0;c112144.graph_c0;c112507.graph_c0;c114370.graph_c0;c118619.graph_c0;c118881.graph_c0;c122045.graph_c0;c125898.graph_c1;c128389.graph_c0;c128760.graph_c0;c131119.graph_c0;c131119.graph_c1;c132003.graph_c1;c132441.graph_c0;c132784.graph_c0;c134348.graph_c0;c91463.graph_c0<br>c101596.graph_c0;c101644.graph_c0;c102008.graph_c0;c102091.graph_c0;c102177.graph_c0;c105700.graph_c0;c107088.graph_c0;c111404.graph_c0;c111951.graph_c1;c120594.graph_c0;c122529.graph_c0;c124921.graph_c0;c131924.graph_c1;c132793.graph_c0;c50756.graph_c0;c71464.graph_c0;c95982.graph_c0;c97392.graph_c0<br>c100821.graph_c0;c106243.graph_c0;c112408.graph_c0;c112914.graph_c0;c121031.graph_c0;c122230.graph_c0;c123524.graph_c0;c124334.graph_c0;c124834.graph_c0;c125451.graph_c1;c129153.graph_c0;c129927.graph_c0;c130262.graph_c0;c132024.graph_c0;c1 | 3+K00855+K01738+K00615+K01689+K00026+K13034+K01738+K01681+K01738+K01610+K00030+K01057+K01057+K01895                                                                                                                                                            |
| Photosynthesis              | ko001<br>95 | 18 | 144 | 408 | 13897 | c100506.graph_c0;c105088.graph_c0;c112144.graph_c0;c112507.graph_c0;c114370.graph_c0;c118619.graph_c0;c118881.graph_c0;c122045.graph_c0;c125898.graph_c1;c128389.graph_c0;c128760.graph_c0;c131119.graph_c0;c131119.graph_c1;c132003.graph_c1;c132441.graph_c0;c132784.graph_c0;c134348.graph_c0;c91463.graph_c0<br>c101596.graph_c0;c101644.graph_c0;c102008.graph_c0;c102091.graph_c0;c102177.graph_c0;c105700.graph_c0;c107088.graph_c0;c111404.graph_c0;c111951.graph_c1;c120594.graph_c0;c122529.graph_c0;c124921.graph_c0;c131924.graph_c1;c132793.graph_c0;c50756.graph_c0;c71464.graph_c0;c95982.graph_c0;c97392.graph_c0<br>c100821.graph_c0;c106243.graph_c0;c112408.graph_c0;c112914.graph_c0;c121031.graph_c0;c122230.graph_c0;c123524.graph_c0;c124334.graph_c0;c124834.graph_c0;c125451.graph_c1;c129153.graph_c0;c129927.graph_c0;c130262.graph_c0;c132024.graph_c0;c1                                                                                                                                                                                                                                                                                                                        | K13448+K13448+K02183+K13448+K04368+K13448+K13448+K18875+K13457+K13447+K13412+K13412+K13412+K18835+K13412+K13447+K13457+K12795<br>K02701+K02638+K02639+K02698+K02723+K08902+K03542+K14332+K02641+K02113+K02109+K02694+K02693+K02705+K02721+K08905+K02641+K02717 |
| Biosynthesis of amino acids | ko012<br>30 | 18 | 812 | 408 | 13897 | c100506.graph_c0;c105088.graph_c0;c112144.graph_c0;c112507.graph_c0;c114370.graph_c0;c118619.graph_c0;c118881.graph_c0;c122045.graph_c0;c125898.graph_c1;c128389.graph_c0;c128760.graph_c0;c131119.graph_c0;c131119.graph_c1;c132003.graph_c1;c132441.graph_c0;c132784.graph_c0;c134348.graph_c0;c91463.graph_c0<br>c101596.graph_c0;c101644.graph_c0;c102008.graph_c0;c102091.graph_c0;c102177.graph_c0;c105700.graph_c0;c107088.graph_c0;c111404.graph_c0;c111951.graph_c1;c120594.graph_c0;c122529.graph_c0;c124921.graph_c0;c131924.graph_c1;c132793.graph_c0;c50756.graph_c0;c71464.graph_c0;c95982.graph_c0;c97392.graph_c0<br>c100821.graph_c0;c106243.graph_c0;c112408.graph_c0;c112914.graph_c0;c121031.graph_c0;c122230.graph_c0;c123524.graph_c0;c124334.graph_c0;c124834.graph_c0;c125451.graph_c1;c129153.graph_c0;c129927.graph_c0;c130262.graph_c0;c132024.graph_c0;c1                                                                                                                                                                                                                                                                                                                        | K00891+K00134+K13832+K00134+K01817+K01695+K00873+K01738+K00615+K13832+K01689+K13832+K13034+K01738+K13832+K01681+K01738+K00030                                                                                                                                  |

|                                             |         |    |     |     |       |                                                                                                                                                                                                                                                             |                                                                                                          |
|---------------------------------------------|---------|----|-----|-----|-------|-------------------------------------------------------------------------------------------------------------------------------------------------------------------------------------------------------------------------------------------------------------|----------------------------------------------------------------------------------------------------------|
|                                             |         |    |     |     |       | 33161.graph_c0;c133476.graph_c0;c134598.graph_c0;c49644.graph_c0                                                                                                                                                                                            |                                                                                                          |
| Ribosome                                    | ko03010 | 15 | 996 | 408 | 13897 | c100604.graph_c0;c102533.graph_c0;c106099.graph_c0;c108526.graph_c1;c110436.graph_c0;c111222.graph_c0;c118085.graph_c0;c119933.graph_c0;c123322.graph_c0;c123949.graph_c0;c124097.graph_c0;c55594.graph_c0;c74451.graph_c0;c77479.graph_c0;c90571.graph_c0  | K02977+K02937+K02962+K02979+K02870+K02866+K02988+K02880+K02889+K02932+K02988+K02960+K02949+K02960+K02949 |
| Glutathione metabolism                      | ko00480 | 15 | 235 | 408 | 13897 | c101895.graph_c0;c105192.graph_c0;c105273.graph_c0;c108187.graph_c0;c111372.graph_c0;c112220.graph_c0;c113610.graph_c0;c117370.graph_c0;c119814.graph_c0;c125111.graph_c0;c125826.graph_c0;c133973.graph_c0;c51066.graph_c0;c98149.graph_c0;c98296.graph_c0 | K00799+K00799+K01919+K00432+K00799+K00799+K00799+K00799+K00799+K00799+K01919+K00799+K00799+K00799        |
| Protein processing in endoplasmic reticulum | ko04141 | 15 | 868 | 408 | 13897 | c102704.graph_c0;c108317.graph_c0;c109348.graph_c0;c110519.graph_c0;c112831.graph_c0;c115728.graph_c0;c117552.graph_c0;c121542.graph_c1;c125404.graph_c0;c130072.graph_c0;c131510.graph_c0;c131834.graph_c0;c23599.graph_c0;c52034.graph_c0;c93826.graph_c0 | K03094+K03283+K09490+K03283+K09503+K03094+K03347+K13993+K10575+K03283+K03283+K03283+K13993+K1393         |
| Glycolysis / Gluconeogenesis                | ko00010 | 14 | 448 | 408 | 13897 | c106243.graph_c0;c108564.graph_c0;c109130.graph_c0;c112914.graph_c0;c118104.graph_c0;c118228.graph_c1;c120249.graph_c0;c120295.graph_c0;c123524.graph_c0;c129153.graph_c0;c132004.graph_c0;c132004.graph_c1;c134605.graph_c0;c62501.graph_c0                | K00134+K00001+K01792+K00134+K18857+K00121+K00844+K01895+K00873+K01689+K01785+K01785+K01610+K01895        |
| Spliceosome                                 | ko030   | 14 | 868 | 408 | 13897 | c100425.graph_c0;c102019.graph_c0;c108164.graph_c0                                                                                                                                                                                                          | K12874+K12882+K12874+K03283+K03283                                                                       |

|                                      |         |    |     |     |       |                                                                                                                                                                                                            |                                                                                     |
|--------------------------------------|---------|----|-----|-----|-------|------------------------------------------------------------------------------------------------------------------------------------------------------------------------------------------------------------|-------------------------------------------------------------------------------------|
|                                      | 40      |    |     |     |       | c0;c108317.graph_c0;c110519.graph_c0;c120921.graph_c0;c130072.graph_c0;c130121.graph_c0;c131510.graph_c0;c131834.graph_c0;c133691.graph_c0;c134621.graph_c0;c23599.graph_c0;c91908.graph_c0                | +K12874+K03283+K12830+K03283+K03283+K12833+K12882+K03283+K12833                     |
| RNA degradation                      | ko03018 | 12 | 419 | 408 | 13897 | c106929.graph_c0;c115207.graph_c0;c115874.graph_c0;c116900.graph_c0;c116941.graph_c0;c120023.graph_c0;c120290.graph_c0;c122821.graph_c0;c126899.graph_c0;c128434.graph_c0;c129153.graph_c0;c93753.graph_c0 | K12604+K12608+K12605+K12619+K12606+K13126+K12608+K12581+K13126+K12580+K01689+K14442 |
| Cutin, suberine and wax biosynthesis | ko00073 | 11 | 60  | 408 | 13897 | c100231.graph_c0;c119134.graph_c1;c124147.graph_c0;c124424.graph_c0;c128040.graph_c0;c131711.graph_c0;c132698.graph_c0;c133529.graph_c0;c23649.graph_c0;c97209.graph_c0;c99637.graph_c1                    | K13356+K15400+K13356+K15404+K13356+K15404+K15398+K13407+K13356+K13356+K13356        |
| Endocytosis                          | ko04144 | 11 | 472 | 408 | 13897 | c108317.graph_c0;c110519.graph_c0;c112162.graph_c0;c114229.graph_c0;c121339.graph_c0;c130072.graph_c0;c131510.graph_c0;c131641.graph_c0;c131641.graph_c1;c131834.graph_c0;c23599.graph_c0                  | K03283+K03283+K07904+K12489+K01115+K03283+K03283+K12489+K12489+K03283+K03283        |
| Photosynthesis - antenna proteins    | ko00196 | 10 | 52  | 408 | 13897 | c100527.graph_c0;c105640.graph_c0;c106848.graph_c0;c109210.graph_c0;c109381.graph_c0;c114287.graph_c0;c123544.graph_c0;c23604.graph_c0;c46372.graph_c0;c89853.graph_c0                                     | K08910+K08917+K08909+K08912+K08916+K08908+K08912+K08913+K08913+K08908               |
| Galactose metabolism                 | ko00052 | 10 | 166 | 408 | 13897 | c102094.graph_c0;c120249.graph_c0;c122856.graph_c0;c123062.graph_c0;c124235.graph_c0;c127648.graph_c0;c130684.graph_c0;c132004.graph_c0;c132004.                                                           | K18819+K00844+K00011+K01784+K01784+K18819+K01193+K01785+K01785+K06617               |

|                                    |         |    |     |     |       |                                                                                                                                                                                                     |                                                                       |
|------------------------------------|---------|----|-----|-----|-------|-----------------------------------------------------------------------------------------------------------------------------------------------------------------------------------------------------|-----------------------------------------------------------------------|
| Cyanoamino acid metabolism         | ko00460 | 10 | 114 | 408 | 13897 | graph_c1;c49856.graph_c0<br>c118113.graph_c0;c118816.graph_c0;c120604.graph_c0;c121995.graph_c0;c127309.graph_c0;c127792.graph_c0;c128547.graph_c1;c130262.graph_c0;c86535.graph_c0;c97687.graph_c0 | K01188+K01188+K01188+K01188+K05349+K01188+K01188+K13034+K01188+K01188 |
| RNA transport                      | ko03013 | 9  | 630 | 408 | 13897 | c102019.graph_c0;c113016.graph_c1;c116762.graph_c0;c120023.graph_c0;c120228.graph_c0;c126899.graph_c0;c130438.graph_c0;c134621.graph_c0;c97352.graph_c0                                             | K12882+K07936+K03257+K13126+K03113+K13126+K14293+K12882+K12160        |
| alpha-Linolenic acid metabolism    | ko00592 | 9  | 130 | 408 | 13897 | c102687.graph_c0;c115680.graph_c0;c118104.graph_c0;c118459.graph_c0;c120300.graph_c0;c123502.graph_c0;c123665.graph_c0;c133558.graph_c0;c134411.graph_c0                                            | K00454+K10525+K18857+K01723+K05894+K00232+K10525+K00232+K00454        |
| Peroxisome                         | ko04146 | 9  | 287 | 408 | 13897 | c100231.graph_c0;c123502.graph_c0;c124147.graph_c0;c128040.graph_c0;c133558.graph_c0;c23649.graph_c0;c71372.graph_c0;c97209.graph_c0;c99637.graph_c1                                                | K13356+K00232+K13356+K13356+K00232+K13356+K01897+K13356+K13356        |
| Phenylalanine metabolism           | ko00360 | 9  | 171 | 408 | 13897 | c111428.graph_c0;c119082.graph_c0;c121941.graph_c0;c122229.graph_c0;c125198.graph_c0;c125906.graph_c0;c131042.graph_c0;c133129.graph_c0;c133930.graph_c0                                            | K00430+K01904+K00430+K07253+K00430+K00430+K00276+K10775+K00430        |
| Cysteine and methionine metabolism | ko00270 | 9  | 289 | 408 | 13897 | c108515.graph_c0;c112512.graph_c0;c120855.graph_c0;c124334.graph_c0;c129490.graph_c0;c130262.graph_c0;c131509.graph_c0;c132024.graph_c0;c134598.graph_c0                                            | K05933+K08967+K01761+K01738+K00026+K13034+K01244+K01738+K01738        |
| Carbon fixation in                 | ko007   | 8  | 282 | 408 | 13897 | c106243.graph_c0;c112914.graph_c0;c114199.graph_c0                                                                                                                                                  | K00134+K00134+K01100+K05298+K00855                                    |

|                                                     |             |   |     |     |       |                                                                                                                                                |                                                             |
|-----------------------------------------------------|-------------|---|-----|-----|-------|------------------------------------------------------------------------------------------------------------------------------------------------|-------------------------------------------------------------|
| photosynthetic organisms                            | 10          |   |     |     |       | c0;c119204. graph_c0;c123772. graph_c0;c124834. graph_c0;c129490. graph_c0;c134605. graph_c0                                                   | +K00615+K00026+K01610                                       |
| Fatty acid metabolism                               | ko012<br>12 | 8 | 268 | 408 | 13897 | c100226. graph_c0;c108824. graph_c0;c111947. graph_c0;c115084. graph_c0;c123502. graph_c0;c124335. graph_c0;c133558. graph_c0;c71372. graph_c0 | K09458+K01074+K10256+K10251+K00232<br>+K10781+K00232+K01897 |
| Glycerophospholipid metabolism                      | ko005<br>64 | 7 | 243 | 408 | 13897 | c121339. graph_c0;c121925. graph_c0;c122346. graph_c0;c124631. graph_c0;c130294. graph_c0;c70983. graph_c0;c93485. graph_c0                    | K01115+K06130+K01114+K06129+K13508<br>+K13508+K06130        |
| Terpenoid backbone biosynthesis                     | ko009<br>00 | 7 | 155 | 408 | 13897 | c108010. graph_c1;c108150. graph_c0;c112284. graph_c0;c121595. graph_c0;c121595. graph_c1;c125400. graph_c0;c133728. graph_c1                  | K00787+K01662+K01641+K01662+K01662<br>+K11778+K00021        |
| Zeatin biosynthesis                                 | ko009<br>08 | 7 | 19  | 408 | 13897 | c124021. graph_c0;c125250. graph_c0;c129356. graph_c0;c131011. graph_c0;c131511. graph_c0;c132025. graph_c0;c93206. graph_c0                   | K10760+K10760+K13495+K00279+K00791<br>+K00279+K13495        |
| Tyrosine metabolism                                 | ko003<br>50 | 7 | 121 | 408 | 13897 | c108564. graph_c0;c118104. graph_c0;c118228. graph_c1;c122229. graph_c0;c123894. graph_c0;c130866. graph_c0;c131042. graph_c0                  | K00001+K18857+K00121+K07253+K01592<br>+K01592+K00276        |
| Phenylalanine, tyrosine and tryptophan biosynthesis | ko004<br>00 | 7 | 117 | 408 | 13897 | c100821. graph_c0;c112408. graph_c0;c121031. graph_c0;c122230. graph_c0;c125451. graph_c1;c129927. graph_c0;c133161. graph_c0                  | K00891+K13832+K01817+K01695+K13832<br>+K13832+K13832        |
| Oxidative phosphorylation                           | ko001<br>90 | 7 | 552 | 408 | 13897 | c112402. graph_c0;c120594. graph_c0;c121111. graph_c0;c122529. graph_c0;c133150. graph_c1;c50116. graph_c0;c96666. graph_c0                    | K01535+K02113+K03934+K02109+K03935<br>+K01535+K01507        |
| Ubiquitin mediated proteolysis                      | ko041<br>20 | 7 | 468 | 408 | 13897 | c102704. graph_c0;c105963. graph_c0;c115728. graph_c0;c117552. graph_c0;c124199. graph_c0;c125404. gra                                         | K03094+K10144+K03094+K03347+K10143<br>+K10575+K12456        |

|                                             |             |   |     |     |       |                                                                                                                                                 |                                                      |
|---------------------------------------------|-------------|---|-----|-----|-------|-------------------------------------------------------------------------------------------------------------------------------------------------|------------------------------------------------------|
| mRNA surveillance pathway                   | ko030<br>15 | 7 | 452 | 408 | 13897 | ph_c0;c131884.graph_c0<br>c101917.graph_c0;c102019.graph_c0;c120023.graph_c0;c122572.graph_c0;c126899.graph_c0;c134621.graph_c0;c88662.graph_c0 | K11583+K12882+K13126+K11584+K13126<br>+K12882+K03265 |
| Circadian rhythm - plant                    | ko047<br>12 | 6 | 88  | 408 | 13897 | c112186.graph_c0;c122197.graph_c0;c124199.graph_c0;c126452.graph_c1;c130482.graph_c0;c93168.graph_c0                                            | K16166+K12127+K10143+K12130+K12118<br>+K00660        |
| Fructose and mannose metabolism             | ko000<br>51 | 6 | 201 | 408 | 13897 | c104104.graph_c0;c114913.graph_c0;c118742.graph_c0;c120249.graph_c0;c122856.graph_c0;c130978.graph_c0                                           | K00895+K00895+K00895+K00844+K00011<br>+K00895        |
| Thiamine metabolism                         | ko007<br>30 | 6 | 45  | 408 | 13897 | c108150.graph_c0;c112666.graph_c0;c121244.graph_c0;c121595.graph_c0;c121595.graph_c1;c127214.graph_c1                                           | K01662+K03146+K03146+K01662+K01662<br>+K04487        |
| Flavonoid biosynthesis                      | ko009<br>41 | 6 | 64  | 408 | 13897 | c111410.graph_c0;c124882.graph_c0;c126380.graph_c0;c128275.graph_c0;c129786.graph_c1;c93168.graph_c0                                            | K13065+K05277+K13082+K05280+K00475<br>+K00660        |
| Purine metabolism                           | ko002<br>30 | 6 | 563 | 408 | 13897 | c112310.graph_c0;c119749.graph_c0;c121893.graph_c0;c123524.graph_c0;c130274.graph_c0;c64367.graph_c0                                            | K11808+K01466+K01081+K00873+K01427<br>+K02326        |
| Amino sugar and nucleotide sugar metabolism | ko005<br>20 | 6 | 335 | 408 | 13897 | c113248.graph_c0;c120249.graph_c0;c123062.graph_c0;c124235.graph_c0;c126509.graph_c1;c126605.graph_c0                                           | K00012+K00844+K01784+K01784+K00012<br>+K00975        |
| Fatty acid degradation                      | ko000<br>71 | 6 | 197 | 408 | 13897 | c108564.graph_c0;c118104.graph_c0;c118228.graph_c1;c123502.graph_c0;c133558.graph_c0;c71372.graph_c0                                            | K00001+K18857+K00121+K00232+K00232<br>+K01897        |

|                                                   |             |   |     |     |       | h_c0                                                                                      |                                    |  |
|---------------------------------------------------|-------------|---|-----|-----|-------|-------------------------------------------------------------------------------------------|------------------------------------|--|
| Glycine, serine<br>and threonine<br>metabolism    | ko002<br>60 | 5 | 226 | 408 | 13897 | c115387. graph_c0;c116989. graph_c0;c122230. graph_c0;c131042. graph_c0;c96010. graph_c0  | K15893+K00827+K01695+K00276+K02437 |  |
| Pyruvate<br>metabolism                            | ko006<br>20 | 5 | 357 | 408 | 13897 | c120295. graph_c0;c123524. graph_c0;c129490. graph_c0;c134605. graph_c0;c62501. graph_c0  | K01895+K00873+K00026+K01610+K01895 |  |
| SNARE interactions<br>in vesicular<br>transport   | ko041<br>30 | 5 | 99  | 408 | 13897 | c109420. graph_c0;c118823. graph_c0;c122232. graph_c1;c132440. graph_c0;c86325. graph_c0  | K08486+K08503+K08486+K08492+K08507 |  |
| Porphyrin and<br>chlorophyll<br>metabolism        | ko008<br>60 | 5 | 131 | 408 | 13897 | c121882. graph_c0;c123143. graph_c1;c127890. graph_c0;c127890. graph_c1;c98055. graph_c0  | K04035+K03428+K03403+K03403+K03428 |  |
| Alanine, aspartate<br>and glutamate<br>metabolism | ko002<br>50 | 5 | 240 | 408 | 13897 | c116989. graph_c0;c119465. graph_c0;c125256. graph_c1;c127467. graph_c0;c130166. graph_c0 | K00827+K00261+K01955+K01580+K01953 |  |
| Ascorbate and<br>aldarate<br>metabolism           | ko000<br>53 | 5 | 134 | 408 | 13897 | c113248. graph_c0;c119013. graph_c0;c125233. graph_c1;c126509. graph_c1;c70537. graph_c0  | K00012+K00469+K00225+K00012+K00423 |  |
| Pentose phosphate<br>pathway                      | ko000<br>30 | 4 | 196 | 408 | 13897 | c119582. graph_c1;c124834. graph_c0;c50718. graph_c0;c51688. graph_c0                     | K01057+K00615+K01057+K01057        |  |
| Glyoxylate and<br>dicarboxylate<br>metabolism     | ko006<br>30 | 4 | 252 | 408 | 13897 | c115387. graph_c0;c129490. graph_c0;c133476. graph_c0;c96010. graph_c0                    | K15893+K00026+K01681+K02437        |  |
| Steroid<br>biosynthesis                           | ko001<br>00 | 4 | 81  | 408 | 13897 | c101929. graph_c0;c125112. graph_c0;c130196. graph_c0;c97018. graph_c0                    | K01824+K14423+K14423+K01853        |  |
| Protein export                                    | ko030       | 4 | 165 | 408 | 13897 | c109348. graph_c0;c129331. graph_c0;c93255. graph_c0                                      | K09490+K12948+K09648+K03109        |  |

|                                         |             |   |     |     |       |                                                                         |                             |
|-----------------------------------------|-------------|---|-----|-----|-------|-------------------------------------------------------------------------|-----------------------------|
|                                         | 60          |   |     |     |       | 0;c93513. graph_c0                                                      |                             |
| Sulfur metabolism                       | ko009<br>20 | 4 | 92  | 408 | 13897 | c124334. graph_c0;c130262. graph_c0;c132024. graph_c0;c134598. graph_c0 | K01738+K13034+K01738+K01738 |
| Citrate cycle (TCA cycle)               | ko000<br>20 | 4 | 304 | 408 | 13897 | c129490. graph_c0;c133476. graph_c0;c134605. graph_c0;c49644. graph_c0  | K00026+K01681+K01610+K00030 |
| Biosynthesis of unsaturated fatty acids | ko010<br>40 | 4 | 111 | 408 | 13897 | c111947. graph_c0;c115084. graph_c0;c123502. graph_c0;c133558. graph_c0 | K10256+K10251+K00232+K00232 |
| Glycerolipid metabolism                 | ko005<br>61 | 4 | 191 | 408 | 13897 | c122856. graph_c0;c125607. graph_c1;c130294. graph_c0;c70983. graph_c0  | K00011+K03715+K13508+K13508 |
| Carotenoid biosynthesis                 | ko009<br>06 | 4 | 64  | 408 | 13897 | c116858. graph_c0;c122440. graph_c0;c128720. graph_c0;c91224. graph_c0  | K02291+K09840+K09841+K09843 |
| Fatty acid elongation                   | ko000<br>62 | 4 | 86  | 408 | 13897 | c101374. graph_c0;c108824. graph_c0;c115084. graph_c0;c126407. graph_c0 | K15397+K01074+K10251+K15397 |
| Inositol phosphate metabolism           | ko005<br>62 | 4 | 196 | 408 | 13897 | c106470. graph_c0;c119013. graph_c0;c120471. graph_c0;c122346. graph_c0 | K05857+K00469+K00915+K01114 |
| Phosphatidylinositol signaling system   | ko040<br>70 | 3 | 194 | 408 | 13897 | c106470. graph_c0;c112144. graph_c0;c120471. graph_c0                   | K05857+K02183+K00915        |
| Base excision repair                    | ko034<br>10 | 3 | 137 | 408 | 13897 | c124043. graph_c0;c133222. graph_c0;c64367. graph_c0                    | K10798+K10798+K02326        |
| Ribosome biogenesis in eukaryotes       | ko030<br>08 | 3 | 379 | 408 | 13897 | c113016. graph_c1;c116900. graph_c0;c130536. graph_c0                   | K07936+K12619+K11131        |



|                                          |             |   |     |     |       |                                                       |                      |
|------------------------------------------|-------------|---|-----|-----|-------|-------------------------------------------------------|----------------------|
| beta-Alanine<br>metabolism               | ko004<br>10 | 3 | 176 | 408 | 13897 | c118938. graph_c0;c127467. graph_c0;c131042. graph_c0 | K05605+K01580+K00276 |
| Proteasome                               | ko030<br>50 | 3 | 264 | 408 | 13897 | c116158. graph_c0;c118618. graph_c0;c130122. graph_c0 | K02728+K02727+K03062 |
| Propanoate<br>metabolism                 | ko006<br>40 | 3 | 140 | 408 | 13897 | c118938. graph_c0;c120295. graph_c0;c62501. graph_c0  | K05605+K01895+K01895 |
| Nitrogen<br>metabolism                   | ko009<br>10 | 3 | 100 | 408 | 13897 | c119465. graph_c0;c124742. graph_c0;c125396. graph_c0 | K00261+K00366+K01674 |
| Isoquinoline<br>alkaloid<br>biosynthesis | ko009<br>50 | 3 | 54  | 408 | 13897 | c123894. graph_c0;c130866. graph_c0;c131042. graph_c0 | K01592+K01592+K00276 |
| Fatty acid<br>biosynthesis               | ko000<br>61 | 3 | 136 | 408 | 13897 | c100226. graph_c0;c124335. graph_c0;c71372. graph_c0  | K09458+K10781+K01897 |
| Pyrimidine<br>metabolism                 | ko002<br>40 | 3 | 456 | 408 | 13897 | c121893. graph_c0;c125256. graph_c1;c64367. graph_c0  | K01081+K01955+K02326 |
| Homologous<br>recombination              | ko034<br>40 | 3 | 157 | 408 | 13897 | c123433. graph_c0;c127211. graph_c0;c129332. graph_c0 | K10875+K04482+K10879 |
| Brassinosteroid<br>biosynthesis          | ko009<br>05 | 2 | 20  | 408 | 13897 | c105790. graph_c0;c131529. graph_c0                   | K12637+K15639        |
| Other glycan<br>degradation              | ko005<br>11 | 2 | 81  | 408 | 13897 | c123951. graph_c0;c128732. graph_c0                   | K01191+K15923        |
| Butanoate<br>metabolism                  | ko006<br>50 | 2 | 85  | 408 | 13897 | c112284. graph_c0;c127467. graph_c0                   | K01641+K01580        |
| Taurine and<br>hypotaurine<br>metabolism | ko004<br>30 | 2 | 26  | 408 | 13897 | c121597. graph_c0;c127467. graph_c0                   | K10712+K01580        |

---

|                                                  |             |   |     |     |       |                                     |               |
|--------------------------------------------------|-------------|---|-----|-----|-------|-------------------------------------|---------------|
| Biotin metabolism                                | ko007<br>80 | 2 | 39  | 408 | 13897 | c100226. graph_c0;c124338. graph_c0 | K09458+K00652 |
| Nicotinate and<br>nicotinamide<br>metabolism     | ko007<br>60 | 2 | 43  | 408 | 13897 | c121893. graph_c0;c122062. graph_c0 | K01081+K03517 |
| Ether lipid<br>metabolism                        | ko005<br>65 | 2 | 87  | 408 | 13897 | c121339. graph_c0;c122346. graph_c0 | K01115+K01114 |
| Arginine and<br>proline metabolism               | ko003<br>30 | 2 | 287 | 408 | 13897 | c119465. graph_c0;c130274. graph_c0 | K00261+K01427 |
| DNA replication                                  | ko030<br>30 | 2 | 216 | 408 | 13897 | c121683. graph_c0;c64367. graph_c0  | K10745+K02326 |
| Regulation of<br>autophagy                       | ko041<br>40 | 2 | 134 | 408 | 13897 | c120184. graph_c0;c128260. graph_c0 | K07198+K07198 |
| Valine, leucine<br>and isoleucine<br>degradation | ko002<br>80 | 2 | 223 | 408 | 13897 | c112284. graph_c0;c118938. graph_c0 | K01641+K05605 |
| Basal<br>transcription<br>factors                | ko030<br>22 | 2 | 135 | 408 | 13897 | c114404. graph_c0;c124056. graph_c0 | K03139+K03120 |
| 2-Oxocarboxylic<br>acid metabolism               | ko012<br>10 | 2 | 216 | 408 | 13897 | c133476. graph_c0;c49644. graph_c0  | K01681+K00030 |
| Monoterpenoid<br>biosynthesis                    | ko009<br>02 | 2 | 6   | 408 | 13897 | c102174. graph_c0;c129369. graph_c0 | K15086+K15095 |
| Sphingolipid<br>metabolism                       | ko006<br>00 | 2 | 111 | 408 | 13897 | c132695. graph_c0;c133691. graph_c1 | K00654+K04713 |

---

|                                   |             |   |     |     |       |                                   |               |
|-----------------------------------|-------------|---|-----|-----|-------|-----------------------------------|---------------|
| Sulfur relay system               | ko041<br>22 | 2 | 37  | 408 | 13897 | c127214.graph_c1;c127644.graph_c0 | K04487+K03639 |
| Linoleic acid metabolism          | ko005<br>91 | 2 | 39  | 408 | 13897 | c102687.graph_c0;c134411.graph_c0 | K00454+K00454 |
| Degradation of aromatic compounds | ko012<br>20 | 2 | 27  | 408 | 13897 | c108564.graph_c0;c118228.graph_c1 | K00001+K00121 |
| Diterpenoid biosynthesis          | ko009<br>04 | 1 | 25  | 408 | 13897 | c89332.graph_c0                   | K17982        |
| Pantothenate and CoA biosynthesis | ko007<br>70 | 1 | 80  | 408 | 13897 | c114123.graph_c0                  | K02201        |
| Folate biosynthesis               | ko007<br>90 | 1 | 47  | 408 | 13897 | c127644.graph_c0                  | K03639        |
| Nucleotide excision repair        | ko034<br>20 | 1 | 225 | 408 | 13897 | c64367.graph_c0                   | K02326        |
| Phagosome                         | ko041<br>45 | 1 | 348 | 408 | 13897 | c132440.graph_c0                  | K08492        |
| Flavone and flavonol biosynthesis | ko009<br>44 | 1 | 6   | 408 | 13897 | c128275.graph_c0                  | K05280        |
| Selenocompound metabolism         | ko004<br>50 | 1 | 89  | 408 | 13897 | c120855.graph_c0                  | K01761        |
| Vitamin B6 metabolism             | ko007<br>50 | 1 | 38  | 408 | 13897 | c90381.graph_c0                   | K13248        |
| N-Glycan biosynthesis             | ko005<br>10 | 1 | 156 | 408 | 13897 | c117730.graph_c0                  | K00737        |
| Ubiquinone and                    | ko001       | 1 | 74  | 408 | 13897 | c119082.graph_c0                  | K01904        |

---

|                                                                 |             |   |     |     |       |                  |  |        |
|-----------------------------------------------------------------|-------------|---|-----|-----|-------|------------------|--|--------|
| other                                                           | 30          |   |     |     |       |                  |  |        |
| terpenoid-quinone<br>biosynthesis                               |             |   |     |     |       |                  |  |        |
| Vancomycin<br>resistance                                        | ko015<br>02 | 1 | 2   | 408 | 13897 | c108176.graph_c0 |  | K02563 |
| Riboflavin<br>metabolism                                        | ko007<br>40 | 1 | 26  | 408 | 13897 | c112285.graph_c0 |  | K14652 |
| Stilbenoid,<br>diarylheptanoid<br>and gingerol<br>biosynthesis  | ko009<br>45 | 1 | 34  | 408 | 13897 | c111410.graph_c0 |  | K13065 |
| Sesquiterpenoid<br>and triterpenoid<br>biosynthesis             | ko009<br>09 | 1 | 22  | 408 | 13897 | c124467.graph_c0 |  | K15803 |
| Tropane,<br>piperidine and<br>pyridine alkaloid<br>biosynthesis | ko009<br>60 | 1 | 67  | 408 | 13897 | c131042.graph_c0 |  | K00276 |
| Arachidonic acid<br>metabolism                                  | ko005<br>90 | 1 | 51  | 408 | 13897 | c108187.graph_c0 |  | K00432 |
| Non-homologous<br>end-joining                                   | ko034<br>50 | 1 | 24  | 408 | 13897 | c128093.graph_c0 |  | K10886 |
| ABC transporters                                                | ko020<br>10 | 1 | 155 | 408 | 13897 | c134352.graph_c0 |  | K05658 |
| Anthocyanin                                                     | ko009       | 1 | 4   | 408 | 13897 | c117163.graph_c0 |  | K12338 |

---

---

|                                                  |             |   |     |     |       |                  |  |        |
|--------------------------------------------------|-------------|---|-----|-----|-------|------------------|--|--------|
| biosynthesis                                     | 42          |   |     |     |       |                  |  |        |
| Synthesis and<br>degradation of<br>ketone bodies | ko000<br>72 | 1 | 27  | 408 | 13897 | c112284.graph_c0 |  | K01641 |
| Aminoacyl-tRNA<br>biosynthesis                   | ko009<br>70 | 1 | 289 | 408 | 13897 | c78250.graph_c0  |  | K01893 |

---

Table S8. Expression profiles of differentially expressed genes involved in petal variegation of *P.rockii*.

| Genes       | Unigene ID       | FRKM        |           |             |
|-------------|------------------|-------------|-----------|-------------|
|             |                  | Po          | Pr        | RO          |
| <i>PAL</i>  | c133129.graph_c0 | 45          | 15.71     | 9.94        |
| <i>CHS</i>  | c102425.graph_c0 | 6680.96     | 2525.95   | 4231.85     |
| <i>CHI</i>  | c105653.graph_c0 | 5.57        | 71.34     | 9.4         |
| <i>DFR</i>  | c126380.graph_c0 | 26.18       | 49.13     | 153.27      |
| <i>FLS</i>  | c102035.graph_c0 | 3.65        | 7.3       | 3.87        |
| <i>F3'H</i> | c128275.graph_c0 | 5.73        | 19.83     | 20.54       |
| <i>F3H</i>  | c129786.graph_c1 | 2.47        | 0         | 0.34        |
| <i>ANS</i>  | c124882.graph_c0 | 65.93       | 293.27    | 153.75      |
| <i>AOMT</i> | c114770.graph_c0 | 6883.707434 | 1307.0698 | 99.2578947  |
|             | c92897.graph_c0  | 22.26       | 9.44      | 17          |
| <i>3GT</i>  | c132750.graph_c0 | 231.07      | 385.93    | 182.14      |
|             | c117163.graph_c0 | 27.36718756 | 3.8774987 | 3.262678295 |
| <i>5GT</i>  | c132577.graph_c0 | 17.47       | 11.14     | 11.18       |
|             | c116462.graph_c0 | 23.86       | 61.85     | 33.73       |
|             | c166326.graph_c0 | 0.22        | 0.27      | 0.12        |
|             | c122681.graph_c0 | 61.64       | 55.66     | 116         |
|             | c112965.graph_c0 | 5.96        | 2.35      | 6.24        |
|             | c105277.graph_c0 | 5.55        | 2.62      | 4.52        |
|             | c115951.graph_c0 | 78.64       | 600.85    | 275.64      |
|             | c71042.graph_c0  | 42.01       | 5.7       | 53.3        |
| <i>GST</i>  | c117370.graph_c0 | 1.76        | 0.61      | 0.6         |
|             | c98149.graph_c0  | 11.43       | 63.24     | 349.05      |
|             | c125111.graph_c0 | 266.23      | 1919.92   | 914.62      |
|             | c101895.graph_c0 | 3.64        | 8.03      | 14.51       |
|             | c113610.graph_c0 | 6.36        | 2.41      | 1.04        |
|             | c105192.graph_c0 | 0.71        | 12.93     | 6.79        |
|             | c96247.graph_c0  | 123.23      | 7.99      | 128.79      |
|             | c98296.graph_c0  | 102.28      | 60.62     | 47.71       |

Table S9. Differentially expressed three transcription factors families between different colored petals.

| Gene name                     | Unigene ID       | FRKM  |       |       |
|-------------------------------|------------------|-------|-------|-------|
|                               |                  | PO    | PR    | RO    |
| R2R3-MYB transcription factor | c158927.graph_c0 | 0.00  | 0.52  | 0.00  |
|                               | c84113.graph_c0  | 0.32  | 0.10  | 0.60  |
|                               | c119563.graph_c0 | 0.93  | 0.25  | 0.16  |
|                               | c127075.graph_c0 | 2.22  | 0.50  | 1.12  |
|                               | c131300.graph_c0 | 0.00  | 0.28  | 0.71  |
|                               | c119993.graph_c0 | 2.76  | 1.56  | 0.52  |
|                               | c115179.graph_c0 | 36.78 | 11.72 | 20.96 |
|                               | c131300.graph_c1 | 0.00  | 0.28  | 0.71  |
|                               | c124756.graph_c0 | 5.13  | 5.95  | 1.38  |
|                               | c112186.graph_c0 | 11.97 | 0.10  | 25.30 |
|                               | c128847.graph_c0 | 21.56 | 11.81 | 32.35 |
|                               | c133735.graph_c0 | 0.34  | 2.74  | 1.37  |
|                               | c117848.graph_c0 | 0.02  | 5.48  | 0.33  |
|                               | c115438.graph_c0 | 0.24  | 0.92  | 0.29  |
| bHLH transcription factor     | c114227.graph_c0 | 10.53 | 4.43  | 6.97  |
|                               | c102655.graph_c0 | 27.40 | 38.01 | 5.79  |
|                               | c124854.graph_c0 | 12.09 | 23.44 | 22.01 |
|                               | c130824.graph_c0 | 1.32  | 0.37  | 0.68  |

Table S10. Bioanalyzer results of all RNA samples.

| <b>Samples</b> | <b>No.of biological replicates</b> | <b>RIN value</b> | <b>rRNA ratio (28S/18S)</b> | <b>Base line</b> | <b>OD 260/280 value</b> | <b>OD 260/230 value</b> | <b>RNA concentration (ng/μl)</b> | <b>Volume (μl)</b> |
|----------------|------------------------------------|------------------|-----------------------------|------------------|-------------------------|-------------------------|----------------------------------|--------------------|
| PO             | 1                                  | 10               | 2                           | Normal           | 2.22                    | 2.26                    | 820.2                            | 25                 |
|                | 2                                  | 10               | 1.9                         | Normal           | 2.21                    | 2.47                    | 1056.9                           | 25                 |
|                | 3                                  | 9.9              | 2                           | Normal           | 2.37                    | 2.37                    | 1067.8                           | 25                 |
| PR             | 1                                  | 9.9              | 2.1                         | Normal           | 2.21                    | 2.2                     | 1386.6                           | 25                 |
|                | 2                                  | 10               | 2                           | Normal           | 2.19                    | 2.27                    | 1571.7                           | 25                 |
|                | 3                                  | 10               | 1.8                         | Normal           | 2.2                     | 2.21                    | 912.3                            | 25                 |
| RO             | 1                                  | 8.9              | 2.3                         | Normal           | 2.2                     | 2.27                    | 436                              | 25                 |
|                | 2                                  | 9.8              | 1.9                         | Normal           | 2.23                    | 2.2                     | 674.1                            | 25                 |
|                | 3                                  | 9.9              | 1.8                         | Normal           | 2.19                    | 1.97                    | 455.2                            | 25                 |



Table S11. The gene names, sequences and all primers used for qRT-PCR analysis.

| <b>Gene</b>   | <b>Unigene ID</b> | <b>Forward primer(5'-3')</b> | <b>Reverse primer (5'-3')</b> |
|---------------|-------------------|------------------------------|-------------------------------|
| <i>PAL-1</i>  | c133129.graph_c0  | AAGTGATCCGTTTCGTCAACC        | TTGGGGTACCTTGGAAGTTG          |
| <i>CHS-1</i>  | c102425.graph_c0  | TATTGTCGGTGCTGATCCTG         | TCACGCAAGTGTCCATCAAT          |
| <i>CHI-1</i>  | c105653.graph_c0  | ATGGTGACGGGAAAGTGAAG         | CTGCTAAGCTCTGCCTTGCT          |
| <i>F3H-1</i>  | c129786.graph_c1  | AGGCTTTATGGTGCCCTGTA         | GCGAGGGAGATATTGGGATT          |
| <i>FLS-1</i>  | c102035.graph_c0  | CCTATAATCGGCCATCTCCA         | ACAGCACAAGGGATTGAACC          |
| <i>DFR-1</i>  | c126380.graph_c0  | TTCCAAGGACCCTGAGAATG         | GTTCTGCAGATGACGTGAA           |
| <i>5GT-1</i>  | c132577.graph_c0  | TGCCAAGCTGATTGAAGATG         | CTCTCCACCTCCCATAACCA          |
| <i>ANS-1</i>  | c124882.graph_c0  | AGAAATCGATTCCGAGGACA         | CCCTTTCCAAAAGCTCATCA          |
| <i>AOMT-1</i> | c92897.graph_c0   | AAGTGAAGCCCGTTTGTTC          | TCATGCTCCCTTGGGTAGAC          |
| <i>GST-1</i>  | c105192.graph_c0  | TCAGAGGGAATGGATGAAGC         | CCATTACGCAACTGACGATG          |
| <i>MYB-1</i>  | c119993.graph_c0  | CGGAGAAATCGAAGAAGTCG         | TCCATCCCCAAGAAGAAGTG          |
| <i>bHLH-1</i> | c114227.graph_c0  | GAGCTCACCAACCTCGAAAC         | TCGGTCTTCGCAACATAGTG          |
| <i>TUB</i>    | c106431.graph_c0  | AGGTAAGATGAGCACCAAAG         | GGAGGAATGTCACAAACACT          |
